# Supplementary material for: Molecular Characterization of the Clinical and Tumor Immune Microenvironment Signature of 5-methylcytosine-Related Regulators in non-small Cell Lung Cancer
Source: Front Cell Dev Biol. 2021 Nov 11;9:779367. doi: 10.3389/fcell.2021.779367 (PMC8632062; doi:10.3389/fcell.2021.779367)
Supplement: Supplementary file 8 [file DataSheet1.xlsx]

## Sheet: Table S1
Table S1. Details of LUAD samples enrolled in this study.
Source	Platform	Sample size	LUAD patients	Survival data
TCGA: LUAD	Illumina RNAseq	594	535	OS
GSE19188	Affymetrix Human Genome U133 Plus 2.0 Array	156	45	OS
GSE31210	Affymetrix Human Genome U133 Plus 2.0 Array	247	226	OS
GSE37745	Affymetrix Human Genome U133 Plus 2.0 Array	196	106	OS
GSE50081	Affymetrix Human Genome U133 Plus 2.0 Array	181	129	OS

## Sheet: Table S2
Table S1. 5mC regulators enrolled in this study.
5mc regulators	Type
DNMT1	writers
DNMT3A	writers
DNMT3B	writers
MBD1	readers
MBD2	readers
MBD3	readers
MBD4	readers
MECP2	readers
NEIL1	readers
NTHL1	readers
SMUG1	readers
TDG	readers
UHRF1	readers
UHRF2	readers
UNG	readers
ZBTB33	readers
ZBTB38	readers
ZBTB4	readers
TET1	erasers
TET2	erasers
TET3	erasers

## Sheet: Table S3
Table S3. CNV frequency of 5mC regulators in TCGA LUAD patients
5mC regulators	Number of samples with CNV Gain	Gain frequency (%)	Number of samples with CNV Loss	Loss frequency (%)
MECP2	65	11.7117	7	1.26126
SMUG1	34	6.12613	10	1.8018
DNMT3B	31	5.58559	14	2.52252
ZBTB38	27	4.86486	7	1.26126
NTHL1	26	4.68468	13	2.34234
ZBTB33	26	4.68468	6	1.08108
DNMT3A	24	4.32432	10	1.8018
UHRF2	23	4.14414	29	5.22523
MBD4	22	3.96396	7	1.26126
NEIL1	19	3.42342	10	1.8018
TET1	18	3.24324	8	1.44144
DNMT1	16	2.88288	17	3.06306
TDG	14	2.52252	27	4.86486
TET3	13	2.34234	8	1.44144
UNG	13	2.34234	26	4.68468
MBD3	13	2.34234	35	6.30631
TET2	11	1.98198	19	3.42342
MBD2	10	1.8018	26	4.68468
UHRF1	10	1.8018	30	5.40541
ZBTB4	8	1.44144	23	4.14414
MBD1	8	1.44144	31	5.58559

## Sheet: Table S4
Table S4. Survival analysis of m6A regulators in TCGA-LUAD
m5C regulators	HR	HR.95L	HR.95H	pvalue	km
DNMT1	1.00443	0.978445	1.03111	0.741009	0.206283
DNMT3A	1.00743	0.958986	1.05833	0.768323	0.144256
DNMT3B	1.01023	0.977931	1.0436	0.539198	0.0316373
MBD1	1.02407	0.972955	1.07787	0.3626	0.0744031
MBD2	1.04214	0.999534	1.08656	0.0526109	5.00829e-05
MBD3	1.03109	0.986594	1.0776	0.173714	0.00527682
MBD4	0.983381	0.954341	1.01331	0.273196	0.0162916
MECP2	0.842815	0.739999	0.959917	0.00998778	0.00228951
NEIL1	0.894865	0.82123	0.975102	0.0112303	3.9992e-06
NTHL1	0.987889	0.963155	1.01326	0.346255	0.0645696
SMUG1	1.04745	1.00801	1.08844	0.017903	0.00186161
TDG	1.05076	1.0079	1.09544	0.0197976	0.00379369
UHRF1	1.05595	1.01307	1.10064	0.0100504	0.00111148
UHRF2	1.04069	0.975789	1.1099	0.224781	0.0150665
UNG	1.01855	1.00365	1.03368	0.0145181	0.00243622
ZBTB33	0.96736	0.917876	1.01951	0.215462	0.155569
ZBTB38	1.03227	0.989399	1.077	0.14224	0.0013386
ZBTB4	0.976026	0.957113	0.995313	0.0150754	0.00084619
TET1	1.10768	0.919713	1.33407	0.28109	0.129876
TET2	0.847369	0.716334	1.00237	0.0533235	0.00415161
TET3	1.01798	0.936961	1.10601	0.673597	0.0814351

## Sheet: Table S5
Table S5. Correlation among 5mC regulators.
5mC regulators	5mC regulators	Correlation	p.value
DNMT1	DNMT1	1	NA
DNMT1	DNMT3A	0.525067	0
DNMT1	DNMT3B	0.465329	0
DNMT1	MBD1	0.249601	6.89917e-10
DNMT1	MBD2	0.0537925	0.190459
DNMT1	MBD3	0.354717	0
DNMT1	MBD4	0.28055	3.3189e-12
DNMT1	MECP2	0.151	0.000221069
DNMT1	NEIL1	-0.0583762	0.155327
DNMT1	NTHL1	0.0163074	0.691636
DNMT1	SMUG1	0.00313901	0.939146
DNMT1	TDG	0.314484	4.21885e-15
DNMT1	TET1	0.239852	3.21912e-09
DNMT1	TET2	0.0495697	0.227696
DNMT1	TET3	0.487137	0
DNMT1	UHRF1	0.679952	0
DNMT1	UHRF2	0.194711	1.74106e-06
DNMT1	UNG	0.417676	0
DNMT1	ZBTB33	0.317567	2.22045e-15
DNMT1	ZBTB38	-0.0375996	0.36031
DNMT1	ZBTB4	-0.250812	5.67125e-10
DNMT3A	DNMT1	0.525067	0
DNMT3A	DNMT3A	1	NA
DNMT3A	DNMT3B	0.507394	0
DNMT3A	MBD1	0.277343	5.95923e-12
DNMT3A	MBD2	-0.00860542	0.834218
DNMT3A	MBD3	0.20527	4.50767e-07
DNMT3A	MBD4	0.177761	1.31235e-05
DNMT3A	MECP2	0.136174	0.000876682
DNMT3A	NEIL1	0.0256592	0.532526
DNMT3A	NTHL1	0.0430599	0.29476
DNMT3A	SMUG1	0.262238	8.48206e-11
DNMT3A	TDG	0.538213	0
DNMT3A	TET1	0.41988	0
DNMT3A	TET2	0.168546	3.64738e-05
DNMT3A	TET3	0.649305	0
DNMT3A	UHRF1	0.431936	0
DNMT3A	UHRF2	0.168383	3.71229e-05
DNMT3A	UNG	0.436035	0
DNMT3A	ZBTB33	0.259924	1.25565e-10
DNMT3A	ZBTB38	-0.0347352	0.398088
DNMT3A	ZBTB4	-0.208587	2.90487e-07
DNMT3B	DNMT1	0.465329	0
DNMT3B	DNMT3A	0.507394	0
DNMT3B	DNMT3B	1	NA
DNMT3B	MBD1	0.093997	0.0219544
DNMT3B	MBD2	-0.0519975	0.205701
DNMT3B	MBD3	0.107074	0.00901076
DNMT3B	MBD4	0.15973	9.23414e-05
DNMT3B	MECP2	0.0033356	0.935343
DNMT3B	NEIL1	-0.0625786	0.127645
DNMT3B	NTHL1	-0.0219971	0.592614
DNMT3B	SMUG1	0.125904	0.00210975
DNMT3B	TDG	0.343205	0
DNMT3B	TET1	0.498959	0
DNMT3B	TET2	0.0585268	0.154262
DNMT3B	TET3	0.346558	0
DNMT3B	UHRF1	0.340407	0
DNMT3B	UHRF2	0.114879	0.00505932
DNMT3B	UNG	0.307202	1.90958e-14
DNMT3B	ZBTB33	0.174146	1.97215e-05
DNMT3B	ZBTB38	-0.0412127	0.315981
DNMT3B	ZBTB4	-0.205299	4.49043e-07
MBD1	DNMT1	0.249601	6.89917e-10
MBD1	DNMT3A	0.277343	5.95923e-12
MBD1	DNMT3B	0.093997	0.0219544
MBD1	MBD1	1	NA
MBD1	MBD2	0.387813	0
MBD1	MBD3	0.228642	1.74481e-08
MBD1	MBD4	0.114293	0.00528971
MBD1	MECP2	0.147695	0.000303973
MBD1	NEIL1	0.179705	1.05055e-05
MBD1	NTHL1	-0.0185869	0.651206
MBD1	SMUG1	0.0527044	0.199596
MBD1	TDG	0.190259	3.01259e-06
MBD1	TET1	0.0968441	0.0182318
MBD1	TET2	0.044976	0.273777
MBD1	TET3	0.263425	6.92617e-11
MBD1	UHRF1	0.202854	6.18047e-07
MBD1	UHRF2	0.111749	0.00640362
MBD1	UNG	0.17273	2.30815e-05
MBD1	ZBTB33	0.0498693	0.224895
MBD1	ZBTB38	0.0155768	0.704789
MBD1	ZBTB4	0.0451806	0.271598
MBD2	DNMT1	0.0537925	0.190459
MBD2	DNMT3A	-0.00860542	0.834218
MBD2	DNMT3B	-0.0519975	0.205701
MBD2	MBD1	0.387813	0
MBD2	MBD2	1	NA
MBD2	MBD3	0.00619973	0.880146
MBD2	MBD4	0.197251	1.26619e-06
MBD2	MECP2	0.22503	2.9536e-08
MBD2	NEIL1	-0.0753906	0.0663324
MBD2	NTHL1	-0.188112	3.90638e-06
MBD2	SMUG1	-0.11213	0.00622442
MBD2	TDG	0.109709	0.00744405
MBD2	TET1	0.19731	1.25694e-06
MBD2	TET2	0.343884	0
MBD2	TET3	0.241496	2.49415e-09
MBD2	UHRF1	0.0874217	0.0331516
MBD2	UHRF2	0.261755	9.20937e-11
MBD2	UNG	0.0246574	0.548654
MBD2	ZBTB33	0.206045	4.0707e-07
MBD2	ZBTB38	0.295403	1.99618e-13
MBD2	ZBTB4	0.00672814	0.870018
MBD3	DNMT1	0.354717	0
MBD3	DNMT3A	0.20527	4.50767e-07
MBD3	DNMT3B	0.107074	0.00901076
MBD3	MBD1	0.228642	1.74481e-08
MBD3	MBD2	0.00619973	0.880146
MBD3	MBD3	1	NA
MBD3	MBD4	-0.0308243	0.453345
MBD3	MECP2	0.00524625	0.89847
MBD3	NEIL1	0.219767	6.26096e-08
MBD3	NTHL1	0.303942	3.68594e-14
MBD3	SMUG1	0.107786	0.00856116
MBD3	TDG	0.00555904	0.892453
MBD3	TET1	-0.165445	5.08433e-05
MBD3	TET2	-0.276837	6.53078e-12
MBD3	TET3	0.0631557	0.124163
MBD3	UHRF1	0.283189	2.03859e-12
MBD3	UHRF2	-0.0831912	0.0426841
MBD3	UNG	0.1155	0.00482497
MBD3	ZBTB33	-0.168289	3.75036e-05
MBD3	ZBTB38	-0.360523	0
MBD3	ZBTB4	0.00157394	0.969465
MBD4	DNMT1	0.28055	3.3189e-12
MBD4	DNMT3A	0.177761	1.31235e-05
MBD4	DNMT3B	0.15973	9.23414e-05
MBD4	MBD1	0.114293	0.00528971
MBD4	MBD2	0.197251	1.26619e-06
MBD4	MBD3	-0.0308243	0.453345
MBD4	MBD4	1	NA
MBD4	MECP2	0.15213	0.000197966
MBD4	NEIL1	0.00856018	0.835077
MBD4	NTHL1	-0.202264	6.67165e-07
MBD4	SMUG1	0.0833996	0.0421653
MBD4	TDG	0.229824	1.46592e-08
MBD4	TET1	0.159422	9.52996e-05
MBD4	TET2	0.211856	1.87052e-07
MBD4	TET3	0.278987	4.41869e-12
MBD4	UHRF1	0.222304	4.36889e-08
MBD4	UHRF2	0.313473	5.32907e-15
MBD4	UNG	0.242295	2.20192e-09
MBD4	ZBTB33	0.30765	1.73195e-14
MBD4	ZBTB38	0.324479	4.44089e-16
MBD4	ZBTB4	-0.300091	7.9492e-14
MECP2	DNMT1	0.151	0.000221069
MECP2	DNMT3A	0.136174	0.000876682
MECP2	DNMT3B	0.0033356	0.935343
MECP2	MBD1	0.147695	0.000303973
MECP2	MBD2	0.22503	2.9536e-08
MECP2	MBD3	0.00524625	0.89847
MECP2	MBD4	0.15213	0.000197966
MECP2	MECP2	1	NA
MECP2	NEIL1	0.154803	0.000151998
MECP2	NTHL1	-0.220686	5.49789e-08
MECP2	SMUG1	-0.253183	3.8525e-10
MECP2	TDG	-0.0154885	0.706385
MECP2	TET1	0.370869	0
MECP2	TET2	0.532976	0
MECP2	TET3	0.423364	0
MECP2	UHRF1	-0.0709683	0.0839555
MECP2	UHRF2	0.366885	0
MECP2	UNG	-0.115764	0.00472855
MECP2	ZBTB33	0.552319	0
MECP2	ZBTB38	0.343267	0
MECP2	ZBTB4	0.251835	4.80241e-10
NEIL1	DNMT1	-0.0583762	0.155327
NEIL1	DNMT3A	0.0256592	0.532526
NEIL1	DNMT3B	-0.0625786	0.127645
NEIL1	MBD1	0.179705	1.05055e-05
NEIL1	MBD2	-0.0753906	0.0663324
NEIL1	MBD3	0.219767	6.26096e-08
NEIL1	MBD4	0.00856018	0.835077
NEIL1	MECP2	0.154803	0.000151998
NEIL1	NEIL1	1	NA
NEIL1	NTHL1	0.227631	2.02354e-08
NEIL1	SMUG1	-0.0190201	0.643632
NEIL1	TDG	-0.173345	2.15607e-05
NEIL1	TET1	-0.0116486	0.776937
NEIL1	TET2	0.0921524	0.0247041
NEIL1	TET3	-0.0123287	0.764288
NEIL1	UHRF1	-0.24887	7.76147e-10
NEIL1	UHRF2	0.00254645	0.950617
NEIL1	UNG	-0.286651	1.06715e-12
NEIL1	ZBTB33	-0.100811	0.0139684
NEIL1	ZBTB38	-0.183388	6.84878e-06
NEIL1	ZBTB4	0.21062	2.21095e-07
NTHL1	DNMT1	0.0163074	0.691636
NTHL1	DNMT3A	0.0430599	0.29476
NTHL1	DNMT3B	-0.0219971	0.592614
NTHL1	MBD1	-0.0185869	0.651206
NTHL1	MBD2	-0.188112	3.90638e-06
NTHL1	MBD3	0.303942	3.68594e-14
NTHL1	MBD4	-0.202264	6.67165e-07
NTHL1	MECP2	-0.220686	5.49789e-08
NTHL1	NEIL1	0.227631	2.02354e-08
NTHL1	NTHL1	1	NA
NTHL1	SMUG1	0.327502	2.22045e-16
NTHL1	TDG	-0.0127003	0.757403
NTHL1	TET1	-0.186002	5.02837e-06
NTHL1	TET2	-0.257571	1.864e-10
NTHL1	TET3	-0.219661	6.35506e-08
NTHL1	UHRF1	0.0453108	0.270218
NTHL1	UHRF2	-0.149006	0.000268103
NTHL1	UNG	0.0706483	0.0853648
NTHL1	ZBTB33	-0.18576	5.17504e-06
NTHL1	ZBTB38	-0.41971	0
NTHL1	ZBTB4	-0.101407	0.013411
SMUG1	DNMT1	0.00313901	0.939146
SMUG1	DNMT3A	0.262238	8.48206e-11
SMUG1	DNMT3B	0.125904	0.00210975
SMUG1	MBD1	0.0527044	0.199596
SMUG1	MBD2	-0.11213	0.00622442
SMUG1	MBD3	0.107786	0.00856116
SMUG1	MBD4	0.0833996	0.0421653
SMUG1	MECP2	-0.253183	3.8525e-10
SMUG1	NEIL1	-0.0190201	0.643632
SMUG1	NTHL1	0.327502	2.22045e-16
SMUG1	SMUG1	1	NA
SMUG1	TDG	0.385717	0
SMUG1	TET1	0.0206322	0.615777
SMUG1	TET2	-0.16662	4.48649e-05
SMUG1	TET3	0.028127	0.493846
SMUG1	UHRF1	0.213156	1.56699e-07
SMUG1	UHRF2	-0.0658872	0.108676
SMUG1	UNG	0.406082	0
SMUG1	ZBTB33	-0.100354	0.0144101
SMUG1	ZBTB38	-0.153672	0.00017006
SMUG1	ZBTB4	-0.424307	0
TDG	DNMT1	0.314484	4.21885e-15
TDG	DNMT3A	0.538213	0
TDG	DNMT3B	0.343205	0
TDG	MBD1	0.190259	3.01259e-06
TDG	MBD2	0.109709	0.00744405
TDG	MBD3	0.00555904	0.892453
TDG	MBD4	0.229824	1.46592e-08
TDG	MECP2	-0.0154885	0.706385
TDG	NEIL1	-0.173345	2.15607e-05
TDG	NTHL1	-0.0127003	0.757403
TDG	SMUG1	0.385717	0
TDG	TDG	1	NA
TDG	TET1	0.414771	0
TDG	TET2	0.175422	1.70968e-05
TDG	TET3	0.491226	0
TDG	UHRF1	0.412132	0
TDG	UHRF2	0.178133	1.25791e-05
TDG	UNG	0.603655	0
TDG	ZBTB33	0.263951	6.3296e-11
TDG	ZBTB38	0.122258	0.00283947
TDG	ZBTB4	-0.43296	0
TET1	DNMT1	0.239852	3.21912e-09
TET1	DNMT3A	0.41988	0
TET1	DNMT3B	0.498959	0
TET1	MBD1	0.0968441	0.0182318
TET1	MBD2	0.19731	1.25694e-06
TET1	MBD3	-0.165445	5.08433e-05
TET1	MBD4	0.159422	9.52996e-05
TET1	MECP2	0.370869	0
TET1	NEIL1	-0.0116486	0.776937
TET1	NTHL1	-0.186002	5.02837e-06
TET1	SMUG1	0.0206322	0.615777
TET1	TDG	0.414771	0
TET1	TET1	1	NA
TET1	TET2	0.661744	0
TET1	TET3	0.544927	0
TET1	UHRF1	0.181624	8.41512e-06
TET1	UHRF2	0.438047	0
TET1	UNG	0.139495	0.00065125
TET1	ZBTB33	0.468445	0
TET1	ZBTB38	0.39646	0
TET1	ZBTB4	-0.166703	4.44659e-05
TET2	DNMT1	0.0495697	0.227696
TET2	DNMT3A	0.168546	3.64738e-05
TET2	DNMT3B	0.0585268	0.154262
TET2	MBD1	0.044976	0.273777
TET2	MBD2	0.343884	0
TET2	MBD3	-0.276837	6.53078e-12
TET2	MBD4	0.211856	1.87052e-07
TET2	MECP2	0.532976	0
TET2	NEIL1	0.0921524	0.0247041
TET2	NTHL1	-0.257571	1.864e-10
TET2	SMUG1	-0.16662	4.48649e-05
TET2	TDG	0.175422	1.70968e-05
TET2	TET1	0.661744	0
TET2	TET2	1	NA
TET2	TET3	0.465789	0
TET2	UHRF1	-0.0172532	0.674747
TET2	UHRF2	0.528641	0
TET2	UNG	-0.168625	3.61652e-05
TET2	ZBTB33	0.524883	0
TET2	ZBTB38	0.639651	0
TET2	ZBTB4	0.00124064	0.975929
TET3	DNMT1	0.487137	0
TET3	DNMT3A	0.649305	0
TET3	DNMT3B	0.346558	0
TET3	MBD1	0.263425	6.92617e-11
TET3	MBD2	0.241496	2.49415e-09
TET3	MBD3	0.0631557	0.124163
TET3	MBD4	0.278987	4.41869e-12
TET3	MECP2	0.423364	0
TET3	NEIL1	-0.0123287	0.764288
TET3	NTHL1	-0.219661	6.35506e-08
TET3	SMUG1	0.028127	0.493846
TET3	TDG	0.491226	0
TET3	TET1	0.544927	0
TET3	TET2	0.465789	0
TET3	TET3	1	NA
TET3	UHRF1	0.375971	0
TET3	UHRF2	0.331574	0
TET3	UNG	0.306813	2.04281e-14
TET3	ZBTB33	0.476276	0
TET3	ZBTB38	0.313023	5.77316e-15
TET3	ZBTB4	-0.114159	0.00534382
UHRF1	DNMT1	0.679952	0
UHRF1	DNMT3A	0.431936	0
UHRF1	DNMT3B	0.340407	0
UHRF1	MBD1	0.202854	6.18047e-07
UHRF1	MBD2	0.0874217	0.0331516
UHRF1	MBD3	0.283189	2.03859e-12
UHRF1	MBD4	0.222304	4.36889e-08
UHRF1	MECP2	-0.0709683	0.0839555
UHRF1	NEIL1	-0.24887	7.76147e-10
UHRF1	NTHL1	0.0453108	0.270218
UHRF1	SMUG1	0.213156	1.56699e-07
UHRF1	TDG	0.412132	0
UHRF1	TET1	0.181624	8.41512e-06
UHRF1	TET2	-0.0172532	0.674747
UHRF1	TET3	0.375971	0
UHRF1	UHRF1	1	NA
UHRF1	UHRF2	0.187869	4.02242e-06
UHRF1	UNG	0.578165	0
UHRF1	ZBTB33	0.172098	2.47498e-05
UHRF1	ZBTB38	0.0206855	0.614864
UHRF1	ZBTB4	-0.454465	0
UHRF2	DNMT1	0.194711	1.74106e-06
UHRF2	DNMT3A	0.168383	3.71229e-05
UHRF2	DNMT3B	0.114879	0.00505932
UHRF2	MBD1	0.111749	0.00640362
UHRF2	MBD2	0.261755	9.20937e-11
UHRF2	MBD3	-0.0831912	0.0426841
UHRF2	MBD4	0.313473	5.32907e-15
UHRF2	MECP2	0.366885	0
UHRF2	NEIL1	0.00254645	0.950617
UHRF2	NTHL1	-0.149006	0.000268103
UHRF2	SMUG1	-0.0658872	0.108676
UHRF2	TDG	0.178133	1.25791e-05
UHRF2	TET1	0.438047	0
UHRF2	TET2	0.528641	0
UHRF2	TET3	0.331574	0
UHRF2	UHRF1	0.187869	4.02242e-06
UHRF2	UHRF2	1	NA
UHRF2	UNG	0.0473471	0.249254
UHRF2	ZBTB33	0.411138	0
UHRF2	ZBTB38	0.486807	0
UHRF2	ZBTB4	-0.207569	3.32665e-07
UNG	DNMT1	0.417676	0
UNG	DNMT3A	0.436035	0
UNG	DNMT3B	0.307202	1.90958e-14
UNG	MBD1	0.17273	2.30815e-05
UNG	MBD2	0.0246574	0.548654
UNG	MBD3	0.1155	0.00482497
UNG	MBD4	0.242295	2.20192e-09
UNG	MECP2	-0.115764	0.00472855
UNG	NEIL1	-0.286651	1.06715e-12
UNG	NTHL1	0.0706483	0.0853648
UNG	SMUG1	0.406082	0
UNG	TDG	0.603655	0
UNG	TET1	0.139495	0.00065125
UNG	TET2	-0.168625	3.61652e-05
UNG	TET3	0.306813	2.04281e-14
UNG	UHRF1	0.578165	0
UNG	UHRF2	0.0473471	0.249254
UNG	UNG	1	NA
UNG	ZBTB33	0.183008	7.16033e-06
UNG	ZBTB38	-0.107953	0.00845843
UNG	ZBTB4	-0.425667	0
ZBTB33	DNMT1	0.317567	2.22045e-15
ZBTB33	DNMT3A	0.259924	1.25565e-10
ZBTB33	DNMT3B	0.174146	1.97215e-05
ZBTB33	MBD1	0.0498693	0.224895
ZBTB33	MBD2	0.206045	4.0707e-07
ZBTB33	MBD3	-0.168289	3.75036e-05
ZBTB33	MBD4	0.30765	1.73195e-14
ZBTB33	MECP2	0.552319	0
ZBTB33	NEIL1	-0.100811	0.0139684
ZBTB33	NTHL1	-0.18576	5.17504e-06
ZBTB33	SMUG1	-0.100354	0.0144101
ZBTB33	TDG	0.263951	6.3296e-11
ZBTB33	TET1	0.468445	0
ZBTB33	TET2	0.524883	0
ZBTB33	TET3	0.476276	0
ZBTB33	UHRF1	0.172098	2.47498e-05
ZBTB33	UHRF2	0.411138	0
ZBTB33	UNG	0.183008	7.16033e-06
ZBTB33	ZBTB33	1	NA
ZBTB33	ZBTB38	0.445951	0
ZBTB33	ZBTB4	-0.110079	0.00724468
ZBTB38	DNMT1	-0.0375996	0.36031
ZBTB38	DNMT3A	-0.0347352	0.398088
ZBTB38	DNMT3B	-0.0412127	0.315981
ZBTB38	MBD1	0.0155768	0.704789
ZBTB38	MBD2	0.295403	1.99618e-13
ZBTB38	MBD3	-0.360523	0
ZBTB38	MBD4	0.324479	4.44089e-16
ZBTB38	MECP2	0.343267	0
ZBTB38	NEIL1	-0.183388	6.84878e-06
ZBTB38	NTHL1	-0.41971	0
ZBTB38	SMUG1	-0.153672	0.00017006
ZBTB38	TDG	0.122258	0.00283947
ZBTB38	TET1	0.39646	0
ZBTB38	TET2	0.639651	0
ZBTB38	TET3	0.313023	5.77316e-15
ZBTB38	UHRF1	0.0206855	0.614864
ZBTB38	UHRF2	0.486807	0
ZBTB38	UNG	-0.107953	0.00845843
ZBTB38	ZBTB33	0.445951	0
ZBTB38	ZBTB38	1	NA
ZBTB38	ZBTB4	-0.000994595	0.980702
ZBTB4	DNMT1	-0.250812	5.67125e-10
ZBTB4	DNMT3A	-0.208587	2.90487e-07
ZBTB4	DNMT3B	-0.205299	4.49043e-07
ZBTB4	MBD1	0.0451806	0.271598
ZBTB4	MBD2	0.00672814	0.870018
ZBTB4	MBD3	0.00157394	0.969465
ZBTB4	MBD4	-0.300091	7.9492e-14
ZBTB4	MECP2	0.251835	4.80241e-10
ZBTB4	NEIL1	0.21062	2.21095e-07
ZBTB4	NTHL1	-0.101407	0.013411
ZBTB4	SMUG1	-0.424307	0
ZBTB4	TDG	-0.43296	0
ZBTB4	TET1	-0.166703	4.44659e-05
ZBTB4	TET2	0.00124064	0.975929
ZBTB4	TET3	-0.114159	0.00534382
ZBTB4	UHRF1	-0.454465	0
ZBTB4	UHRF2	-0.207569	3.32665e-07
ZBTB4	UNG	-0.425667	0
ZBTB4	ZBTB33	-0.110079	0.00724468
ZBTB4	ZBTB38	-0.000994595	0.980702
ZBTB4	ZBTB4	1	NA

## Sheet: Table S6
Table S6. Network edge of 5mC regulators.
From	To	Cor	Pvalue	Color	Weight
TET1	TET2	0.661744	4.34267e-76	pink	3.97046
TET1	TET3	0.544927	3.06422e-47	pink	3.26956
TET1	MBD2	0.19731	1.25694e-06	pink	1.18386
TET1	MBD3	-0.165445	5.08433e-05	#6495ED	0.992673
TET1	MBD4	0.159422	9.52996e-05	pink	0.956534
TET1	MECP2	0.370869	8.31935e-21	pink	2.22521
TET1	NTHL1	-0.186002	5.02837e-06	#6495ED	1.11601
TET1	TDG	0.414771	4.22608e-26	pink	2.48862
TET1	UHRF1	0.181624	8.41512e-06	pink	1.08975
TET1	UHRF2	0.438047	3.04174e-29	pink	2.62828
TET1	ZBTB33	0.468445	9.87614e-34	pink	2.81067
TET1	ZBTB38	0.39646	8.53076e-24	pink	2.37876
TET1	ZBTB4	-0.166703	4.44659e-05	#6495ED	1.00022
TET1	DNMT1	0.239852	3.21912e-09	pink	1.43911
TET1	DNMT3A	0.41988	9.05605e-27	pink	2.51928
TET1	DNMT3B	0.498959	1.02729e-38	pink	2.99375
TET2	TET3	0.465789	2.54057e-33	pink	2.79473
TET2	MBD2	0.343884	6.2405e-18	pink	2.06331
TET2	MBD3	-0.276837	6.53079e-12	#6495ED	1.66102
TET2	MBD4	0.211856	1.87052e-07	pink	1.27113
TET2	MECP2	0.532976	6.76067e-45	pink	3.19785
TET2	NTHL1	-0.257571	1.864e-10	#6495ED	1.54543
TET2	SMUG1	-0.16662	4.48649e-05	#6495ED	0.999719
TET2	TDG	0.175422	1.70968e-05	pink	1.05253
TET2	UHRF2	0.528641	4.54126e-44	pink	3.17184
TET2	UNG	-0.168625	3.61652e-05	#6495ED	1.01175
TET2	ZBTB33	0.524883	2.31569e-43	pink	3.1493
TET2	ZBTB38	0.639651	1.16211e-69	pink	3.8379
TET2	DNMT3A	0.168546	3.64738e-05	pink	1.01128
TET3	MBD1	0.263425	6.92617e-11	pink	1.58055
TET3	MBD2	0.241496	2.49415e-09	pink	1.44898
TET3	MBD4	0.278987	4.4186e-12	pink	1.67392
TET3	MECP2	0.423364	3.11895e-27	pink	2.54019
TET3	NTHL1	-0.219661	6.35506e-08	#6495ED	1.31796
TET3	TDG	0.491226	2.10054e-37	pink	2.94735
TET3	UHRF1	0.375971	2.21371e-21	pink	2.25582
TET3	UHRF2	0.331574	1.04029e-16	pink	1.98945
TET3	UNG	0.306813	2.05526e-14	pink	1.84088
TET3	ZBTB33	0.476276	5.79666e-35	pink	2.85766
TET3	ZBTB38	0.313023	5.71468e-15	pink	1.87814
TET3	DNMT1	0.487137	1.00425e-36	pink	2.92282
TET3	DNMT3A	0.649305	2.10119e-72	pink	3.89583
TET3	DNMT3B	0.346558	3.33037e-18	pink	2.07935
MBD1	MBD2	0.387813	9.34436e-23	pink	2.32688
MBD1	MBD3	0.228642	1.74481e-08	pink	1.37185
MBD1	NEIL1	0.179705	1.05055e-05	pink	1.07823
MBD1	TDG	0.190259	3.01259e-06	pink	1.14155
MBD1	UHRF1	0.202854	6.18047e-07	pink	1.21712
MBD1	UNG	0.17273	2.30815e-05	pink	1.03638
MBD1	DNMT1	0.249601	6.89917e-10	pink	1.49761
MBD1	DNMT3A	0.277343	5.95935e-12	pink	1.66406
MBD2	MBD4	0.197251	1.26619e-06	pink	1.18351
MBD2	MECP2	0.22503	2.9536e-08	pink	1.35018
MBD2	NTHL1	-0.188112	3.90638e-06	#6495ED	1.12867
MBD2	UHRF2	0.261755	9.20936e-11	pink	1.57053
MBD2	ZBTB33	0.206045	4.0707e-07	pink	1.23627
MBD2	ZBTB38	0.295403	1.99584e-13	pink	1.77242
MBD3	NEIL1	0.219767	6.26096e-08	pink	1.3186
MBD3	NTHL1	0.303942	3.67595e-14	pink	1.82365
MBD3	UHRF1	0.283189	2.03861e-12	pink	1.69913
MBD3	ZBTB33	-0.168289	3.75036e-05	#6495ED	1.00973
MBD3	ZBTB38	-0.360523	1.13519e-19	#6495ED	2.16314
MBD3	DNMT1	0.354717	4.72055e-19	pink	2.1283
MBD3	DNMT3A	0.20527	4.50767e-07	pink	1.23162
MBD4	NTHL1	-0.202264	6.67165e-07	#6495ED	1.21358
MBD4	TDG	0.229824	1.46592e-08	pink	1.37894
MBD4	UHRF1	0.222304	4.36889e-08	pink	1.33382
MBD4	UHRF2	0.313473	5.20279e-15	pink	1.88084
MBD4	UNG	0.242295	2.20192e-09	pink	1.45377
MBD4	ZBTB33	0.30765	1.73262e-14	pink	1.8459
MBD4	ZBTB38	0.324479	4.97601e-16	pink	1.94687
MBD4	ZBTB4	-0.300091	7.93954e-14	#6495ED	1.80055
MBD4	DNMT1	0.28055	3.31892e-12	pink	1.6833
MBD4	DNMT3A	0.177761	1.31235e-05	pink	1.06656
MBD4	DNMT3B	0.15973	9.23414e-05	pink	0.958378
MECP2	NTHL1	-0.220686	5.49789e-08	#6495ED	1.32412
MECP2	SMUG1	-0.253183	3.8525e-10	#6495ED	1.5191
MECP2	UHRF2	0.366885	2.30162e-20	pink	2.20131
MECP2	ZBTB33	0.552319	9.74678e-49	pink	3.31391
MECP2	ZBTB38	0.343267	7.20741e-18	pink	2.0596
MECP2	ZBTB4	0.251835	4.80241e-10	pink	1.51101
NEIL1	NTHL1	0.227631	2.02354e-08	pink	1.36579
NEIL1	TDG	-0.173345	2.15607e-05	#6495ED	1.04007
NEIL1	UHRF1	-0.24887	7.76147e-10	#6495ED	1.49322
NEIL1	UNG	-0.286651	1.06715e-12	#6495ED	1.71991
NEIL1	ZBTB38	-0.183388	6.84878e-06	#6495ED	1.10033
NEIL1	ZBTB4	0.21062	2.21095e-07	pink	1.26372
NTHL1	SMUG1	0.327502	2.56705e-16	pink	1.96501
NTHL1	ZBTB33	-0.18576	5.17504e-06	#6495ED	1.11456
NTHL1	ZBTB38	-0.41971	9.53573e-27	#6495ED	2.51826
SMUG1	TDG	0.385717	1.65206e-22	pink	2.3143
SMUG1	UHRF1	0.213156	1.56699e-07	pink	1.27894
SMUG1	UNG	0.406082	5.46479e-25	pink	2.43649
SMUG1	ZBTB4	-0.424307	2.33232e-27	#6495ED	2.54584
SMUG1	DNMT3A	0.262238	8.48205e-11	pink	1.57343
TDG	UHRF1	0.412132	9.26769e-26	pink	2.47279
TDG	UHRF2	0.178133	1.25791e-05	pink	1.0688
TDG	UNG	0.603655	2.99322e-60	pink	3.62193
TDG	ZBTB33	0.263951	6.32961e-11	pink	1.5837
TDG	ZBTB4	-0.43296	1.5525e-28	#6495ED	2.59776
TDG	DNMT1	0.314484	4.21079e-15	pink	1.8869
TDG	DNMT3A	0.538213	6.52297e-46	pink	3.22928
TDG	DNMT3B	0.343205	7.31318e-18	pink	2.05923
UHRF1	UHRF2	0.187869	4.02242e-06	pink	1.12721
UHRF1	UNG	0.578165	2.80112e-54	pink	3.46899
UHRF1	ZBTB33	0.172098	2.47498e-05	pink	1.03259
UHRF1	ZBTB4	-0.454465	1.30317e-31	#6495ED	2.72679
UHRF1	DNMT1	0.679952	8.20283e-82	pink	4.07971
UHRF1	DNMT3A	0.431936	2.14778e-28	pink	2.59162
UHRF1	DNMT3B	0.340407	1.39958e-17	pink	2.04244
UHRF2	ZBTB33	0.411138	1.24366e-25	pink	2.46683
UHRF2	ZBTB38	0.486807	1.1387e-36	pink	2.92084
UHRF2	ZBTB4	-0.207569	3.32665e-07	#6495ED	1.24541
UHRF2	DNMT1	0.194711	1.74106e-06	pink	1.16827
UHRF2	DNMT3A	0.168383	3.71229e-05	pink	1.0103
UNG	ZBTB33	0.183008	7.16033e-06	pink	1.09805
UNG	ZBTB4	-0.425667	1.53162e-27	#6495ED	2.554
UNG	DNMT1	0.417676	1.76575e-26	pink	2.50605
UNG	DNMT3A	0.436035	5.8145e-29	pink	2.61621
UNG	DNMT3B	0.307202	1.89856e-14	pink	1.84321
ZBTB33	ZBTB38	0.445951	2.28615e-30	pink	2.67571
ZBTB33	DNMT1	0.317567	2.19772e-15	pink	1.9054
ZBTB33	DNMT3A	0.259924	1.25565e-10	pink	1.55955
ZBTB33	DNMT3B	0.174146	1.97215e-05	pink	1.04488
ZBTB4	DNMT1	-0.250812	5.67125e-10	#6495ED	1.50487
ZBTB4	DNMT3A	-0.208587	2.90487e-07	#6495ED	1.25152
ZBTB4	DNMT3B	-0.205299	4.49043e-07	#6495ED	1.2318
DNMT1	DNMT3A	0.525067	2.13929e-43	pink	3.1504
DNMT1	DNMT3B	0.465329	2.98969e-33	pink	2.79198
DNMT3A	DNMT3B	0.507394	3.49338e-40	pink	3.04436

## Sheet: Table S7
Table S7.Network node of 5mC regulators
Id	Group	Color	Shape	Frame	Pvalue	Size
TET1	erasers	#E41A1C	circle	purple	0.28109	8
TET2	erasers	#E41A1C	circle	green	0.0533235	8
TET3	erasers	#E41A1C	circle	purple	0.673597	8
MBD1	readers	#FF7F00	circle	purple	0.3626	8
MBD2	readers	#FF7F00	circle	purple	0.0526109	8
MBD3	readers	#FF7F00	circle	purple	0.173714	8
MBD4	readers	#FF7F00	circle	green	0.273196	8
MECP2	readers	#FF7F00	circle	green	0.00998778	12
NEIL1	readers	#FF7F00	circle	green	0.0112303	10
NTHL1	readers	#FF7F00	circle	green	0.346255	8
SMUG1	readers	#FF7F00	circle	purple	0.017903	10
TDG	readers	#FF7F00	circle	purple	0.0197976	10
UHRF1	readers	#FF7F00	circle	purple	0.0100504	10
UHRF2	readers	#FF7F00	circle	purple	0.224781	8
UNG	readers	#FF7F00	circle	purple	0.0145181	10
ZBTB33	readers	#FF7F00	circle	green	0.215462	8
ZBTB38	readers	#FF7F00	circle	purple	0.14224	8
ZBTB4	readers	#FF7F00	circle	green	0.0150754	10
DNMT1	writers	#999999	circle	purple	0.741009	8
DNMT3A	writers	#999999	circle	purple	0.768323	8
DNMT3B	writers	#999999	circle	purple	0.539198	8

## Sheet: Table S8
Table S8. LUAD patients in different 5mC clusters
ID	5mCcluster
TCGA-75-6207-01A-11R-1755-07	A
TCGA-78-7160-01A-11R-2039-07	B
TCGA-49-6743-01A-11R-1858-07	C
TCGA-05-4425-01A-01R-1755-07	C
TCGA-78-7143-01A-11R-2039-07	C
TCGA-55-8087-01A-11R-2241-07	B
TCGA-55-6986-01A-11R-1949-07	B
TCGA-35-4123-01A-01R-1107-07	C
TCGA-55-7576-01A-11R-2066-07	B
TCGA-64-5781-01A-01R-1628-07	B
TCGA-L9-A50W-01A-12R-A39D-07	A
TCGA-97-A4M5-01A-11R-A24X-07	B
TCGA-35-4122-01A-01R-1107-07	C
TCGA-55-A48Z-01A-12R-A24X-07	C
TCGA-86-6851-01A-11R-1949-07	B
TCGA-NJ-A4YF-01A-12R-A262-07	A
TCGA-05-4389-01A-01R-1206-07	C
TCGA-NJ-A4YQ-01A-11R-A262-07	A
TCGA-55-6981-01A-11R-1949-07	A
TCGA-97-7546-01A-11R-2039-07	B
TCGA-MN-A4N1-01A-11R-A24X-07	A
TCGA-62-A471-01A-12R-A24H-07	C
TCGA-55-7570-01A-11R-2039-07	C
TCGA-44-3917-01A-01R-A278-07	C
TCGA-55-A4DF-01A-11R-A24H-07	C
TCGA-50-5946-02A-11R-2090-07	C
TCGA-78-8648-01A-11R-2403-07	B
TCGA-67-3770-01A-01R-0946-07	A
TCGA-50-5936-01A-11R-1628-07	C
TCGA-67-6216-01A-11R-1755-07	B
TCGA-69-7974-01A-11R-2187-07	C
TCGA-86-8281-01A-11R-2287-07	B
TCGA-44-2662-01B-02R-A277-07	B
TCGA-93-A4JQ-01A-11R-A24X-07	C
TCGA-55-8207-01A-11R-2241-07	B
TCGA-97-8176-01A-11R-2403-07	A
TCGA-86-8280-01A-11R-2287-07	B
TCGA-MP-A4T8-01A-11R-A24X-07	A
TCGA-55-A492-01A-11R-A24H-07	A
TCGA-J2-8192-01A-11R-2241-07	B
TCGA-50-8460-01A-11R-2326-07	B
TCGA-80-5607-01A-31R-1949-07	C
TCGA-NJ-A55A-01A-11R-A262-07	B
TCGA-55-8097-01A-11R-2241-07	A
TCGA-44-6147-01A-11R-1755-07	B
TCGA-55-A490-01A-11R-A466-07	A
TCGA-86-7711-01A-11R-2066-07	C
TCGA-MP-A4TK-01A-11R-A24X-07	B
TCGA-50-5066-01A-01R-1628-07	A
TCGA-44-2666-01A-01R-A278-07	C
TCGA-50-5942-01A-21R-1755-07	B
TCGA-69-8453-01A-12R-2326-07	B
TCGA-44-8119-01A-11R-2241-07	C
TCGA-MP-A4TE-01A-22R-A466-07	A
TCGA-55-6543-01A-11R-1755-07	B
TCGA-49-AAR3-01A-11R-A41B-07	C
TCGA-38-4632-01A-01R-1755-07	C
TCGA-62-A46S-01A-11R-A24H-07	B
TCGA-99-8033-01A-11R-2241-07	C
TCGA-55-6980-01A-11R-1949-07	B
TCGA-05-4244-01A-01R-1107-07	C
TCGA-91-8497-01A-11R-2403-07	B
TCGA-64-1680-01A-02R-0946-07	A
TCGA-86-7953-01A-11R-2187-07	C
TCGA-55-8616-01A-11R-2403-07	B
TCGA-86-8055-01A-11R-2241-07	B
TCGA-73-4668-01A-01R-1206-07	A
TCGA-95-7567-01A-11R-2066-07	A
TCGA-99-AA5R-01A-11R-A39D-07	B
TCGA-97-8174-01A-11R-2287-07	B
TCGA-55-8089-01A-11R-2241-07	C
TCGA-69-A59K-01A-11R-A262-07	C
TCGA-55-6978-01A-11R-1949-07	C
TCGA-78-7153-01A-11R-2039-07	A
TCGA-05-5715-01A-01R-1628-07	A
TCGA-69-8254-01A-11R-2287-07	B
TCGA-J2-A4AE-01A-21R-A24H-07	C
TCGA-78-7150-01A-21R-2039-07	C
TCGA-93-A4JN-01A-11R-A24X-07	C
TCGA-J2-8194-01A-11R-2241-07	B
TCGA-55-6712-01A-11R-1858-07	A
TCGA-44-2668-01A-01R-A278-07	C
TCGA-55-7815-01A-11R-2170-07	B
TCGA-50-5049-01A-01R-1628-07	C
TCGA-49-4510-01A-01R-1206-07	A
TCGA-73-4666-01A-01R-1206-07	C
TCGA-MP-A5C7-01A-11R-A262-07	B
TCGA-55-7994-01A-11R-2187-07	C
TCGA-95-7039-01A-11R-1949-07	A
TCGA-78-7156-01A-11R-2039-07	B
TCGA-55-8299-01A-11R-2287-07	B
TCGA-44-7661-01A-11R-2066-07	C
TCGA-44-4112-01A-01R-1107-07	A
TCGA-69-7765-01A-11R-2170-07	B
TCGA-55-7281-01A-11R-2039-07	A
TCGA-50-6597-01A-11R-1858-07	A
TCGA-73-4677-01A-01R-1206-07	B
TCGA-05-4434-01A-01R-1206-07	C
TCGA-MP-A4SW-01A-21R-A24X-07	A
TCGA-55-6972-01A-11R-1949-07	A
TCGA-78-7633-01A-11R-2066-07	B
TCGA-44-2659-01A-01R-0946-07	B
TCGA-55-6983-01A-11R-1949-07	B
TCGA-97-A4M0-01A-11R-A24X-07	B
TCGA-50-5068-01A-01R-1628-07	A
TCGA-86-A4P8-01A-11R-A24X-07	B
TCGA-86-A4D0-01A-11R-A24H-07	C
TCGA-55-8085-01A-11R-2241-07	A
TCGA-50-5935-01A-11R-1755-07	B
TCGA-53-7813-01A-11R-2170-07	C
TCGA-73-4662-01A-01R-1206-07	B
TCGA-62-8399-01A-21R-2326-07	B
TCGA-44-7671-01A-11R-2066-07	B
TCGA-97-7552-01A-11R-2039-07	B
TCGA-44-6145-01A-11R-1755-07	C
TCGA-44-7670-01A-11R-2066-07	C
TCGA-49-AARO-01A-12R-A41B-07	A
TCGA-44-2657-01A-01R-1107-07	B
TCGA-55-8204-01A-11R-2241-07	C
TCGA-64-1676-01A-01R-0946-07	A
TCGA-91-8496-01A-11R-2403-07	A
TCGA-35-3615-01A-01R-0946-07	B
TCGA-55-8096-01A-11R-2241-07	A
TCGA-67-6215-01A-11R-1755-07	B
TCGA-53-A4EZ-01A-12R-A24X-07	C
TCGA-MP-A4SY-01A-21R-A24X-07	C
TCGA-73-4676-01A-01R-1755-07	C
TCGA-86-8075-01A-11R-2241-07	C
TCGA-78-8660-01A-11R-2403-07	C
TCGA-91-6840-01A-11R-1949-07	C
TCGA-44-2665-01A-01R-0946-07	A
TCGA-44-6775-01A-11R-1858-07	C
TCGA-75-7025-01A-12R-1949-07	B
TCGA-44-A479-01A-31R-A24H-07	C
TCGA-44-3917-01B-02R-A277-07	B
TCGA-78-7146-01A-11R-2039-07	C
TCGA-91-8499-01A-11R-2403-07	C
TCGA-55-6970-01A-11R-1949-07	B
TCGA-05-4420-01A-01R-1206-07	C
TCGA-86-7701-01A-11R-2170-07	C
TCGA-NJ-A55R-01A-11R-A262-07	A
TCGA-05-4397-01A-01R-1206-07	C
TCGA-53-7626-01A-12R-2066-07	B
TCGA-95-7944-01A-11R-2187-07	C
TCGA-44-2656-01B-06R-A277-07	B
TCGA-73-A9RS-01A-11R-A41B-07	C
TCGA-44-7667-01A-31R-2066-07	C
TCGA-NJ-A55O-01A-11R-A262-07	B
TCGA-55-8301-01A-11R-2287-07	B
TCGA-05-4415-01A-22R-1858-07	C
TCGA-91-6835-01A-11R-1858-07	C
TCGA-55-7725-01A-11R-2170-07	B
TCGA-55-8506-01A-11R-2403-07	A
TCGA-50-5931-01A-11R-1755-07	C
TCGA-44-5645-01A-01R-1628-07	B
TCGA-55-A494-01A-11R-A24X-07	A
TCGA-50-5930-01A-11R-1755-07	B
TCGA-38-4627-01A-01R-1206-07	B
TCGA-67-4679-01B-01R-1755-07	B
TCGA-55-7903-01A-11R-2170-07	C
TCGA-55-8619-01A-11R-2403-07	B
TCGA-05-5428-01A-01R-1628-07	A
TCGA-55-7724-01A-11R-2170-07	C
TCGA-97-7938-01A-11R-2170-07	B
TCGA-50-6590-01A-12R-1858-07	C
TCGA-69-8255-01A-11R-2287-07	C
TCGA-73-7498-01A-12R-2187-07	B
TCGA-78-7148-01A-11R-2039-07	B
TCGA-95-A4VN-01A-11R-A262-07	C
TCGA-78-7152-01A-11R-2039-07	B
TCGA-MP-A4TD-01A-32R-A262-07	A
TCGA-55-7914-01A-11R-2170-07	C
TCGA-44-A47A-01A-21R-A24H-07	A
TCGA-97-A4M3-01A-11R-A24X-07	B
TCGA-67-3773-01A-01R-0946-07	A
TCGA-50-6593-01A-11R-1755-07	B
TCGA-73-4659-01A-01R-1206-07	A
TCGA-38-4630-01A-01R-1206-07	C
TCGA-78-7540-01A-11R-2066-07	A
TCGA-J2-A4AD-01A-11R-A24H-07	B
TCGA-44-6778-01A-11R-1858-07	C
TCGA-38-A44F-01A-11R-A24H-07	B
TCGA-50-6592-01A-11R-1755-07	C
TCGA-44-6775-01A-11R-A278-07	C
TCGA-95-8494-01A-11R-2326-07	A
TCGA-44-2656-01A-02R-0946-07	C
TCGA-50-5055-01A-01R-1628-07	B
TCGA-75-5147-01A-01R-1628-07	C
TCGA-86-8278-01A-11R-2287-07	A
TCGA-05-4250-01A-01R-1107-07	C
TCGA-4B-A93V-01A-11R-A39D-07	A
TCGA-86-7713-01A-11R-2066-07	A
TCGA-55-6982-01A-11R-1949-07	C
TCGA-67-6217-01A-11R-1755-07	B
TCGA-44-6146-01A-11R-A278-07	B
TCGA-49-4512-01A-21R-1858-07	A
TCGA-64-5774-01A-01R-1628-07	A
TCGA-97-8177-01A-11R-2287-07	A
TCGA-78-8640-01A-11R-2403-07	C
TCGA-95-7947-01A-11R-2187-07	C
TCGA-44-6777-01A-11R-1858-07	B
TCGA-55-7816-01A-11R-2170-07	B
TCGA-49-AAR4-01A-12R-A41B-07	A
TCGA-55-7907-01A-11R-2170-07	B
TCGA-86-8359-01A-11R-2326-07	A
TCGA-50-5051-01A-21R-1858-07	A
TCGA-05-4402-01A-01R-1206-07	C
TCGA-50-8459-01A-11R-2326-07	B
TCGA-NJ-A7XG-01A-12R-A39D-07	B
TCGA-49-4488-01A-01R-1755-07	A
TCGA-64-5815-01A-01R-1628-07	B
TCGA-86-8056-01A-11R-2241-07	B
TCGA-78-8655-01A-11R-2403-07	A
TCGA-MP-A4TF-01A-11R-A262-07	C
TCGA-55-8203-01A-11R-2241-07	A
TCGA-91-6848-01A-11R-1949-07	C
TCGA-86-8073-01A-11R-2241-07	B
TCGA-64-5775-01A-01R-1628-07	C
TCGA-44-7659-01A-11R-2066-07	B
TCGA-55-A4DG-01A-11R-A24H-07	B
TCGA-55-6985-01A-11R-1949-07	B
TCGA-86-8054-01A-11R-2241-07	C
TCGA-38-4629-01A-02R-1206-07	A
TCGA-78-7147-01A-11R-2039-07	C
TCGA-55-8092-01A-11R-2241-07	B
TCGA-75-6205-01A-11R-1755-07	C
TCGA-86-A456-01A-11R-A24H-07	B
TCGA-55-8302-01A-11R-2326-07	A
TCGA-05-4384-01A-01R-1755-07	B
TCGA-55-8511-01A-11R-2403-07	A
TCGA-97-7941-01A-11R-2187-07	B
TCGA-62-8397-01A-11R-2326-07	B
TCGA-91-6830-01A-11R-1949-07	B
TCGA-44-3398-01A-01R-1107-07	C
TCGA-55-7913-01B-11R-2241-07	C
TCGA-44-2656-01A-02R-A278-07	C
TCGA-55-1592-01A-01R-0946-07	B
TCGA-91-A4BD-01A-11R-A24H-07	A
TCGA-78-7149-01A-11R-2039-07	B
TCGA-78-7535-01A-11R-2066-07	A
TCGA-49-6742-01A-11R-1858-07	C
TCGA-05-4249-01A-01R-1107-07	A
TCGA-64-1679-01A-21R-2066-07	B
TCGA-69-7760-01A-11R-2170-07	A
TCGA-05-4405-01A-21R-1858-07	B
TCGA-55-6987-01A-11R-1949-07	C
TCGA-05-5429-01A-01R-1628-07	C
TCGA-55-A48X-01A-11R-A24H-07	B
TCGA-86-8673-01A-11R-2403-07	B
TCGA-86-8674-01A-21R-2403-07	A
TCGA-49-6744-01A-11R-1858-07	B
TCGA-44-5643-01A-01R-1628-07	C
TCGA-05-4382-01A-01R-1206-07	B
TCGA-49-AARQ-01A-11R-A41B-07	C
TCGA-55-8094-01A-11R-2241-07	A
TCGA-MP-A4TC-01A-11R-A24X-07	B
TCGA-49-AAR0-01A-21R-A39D-07	A
TCGA-05-4427-01A-21R-1858-07	C
TCGA-75-6214-01A-41R-1949-07	C
TCGA-69-7763-01A-11R-2170-07	B
TCGA-86-8076-01A-31R-2241-07	B
TCGA-62-A46V-01A-11R-A24H-07	B
TCGA-55-A48Y-01A-11R-A24H-07	C
TCGA-71-6725-01A-11R-1858-07	B
TCGA-55-6642-01A-11R-1858-07	B
TCGA-78-7220-01A-11R-2039-07	C
TCGA-L9-A8F4-01A-11R-A39D-07	C
TCGA-35-5375-01A-01R-1628-07	C
TCGA-50-5939-01A-11R-1628-07	C
TCGA-55-8510-01A-11R-2403-07	B
TCGA-38-6178-01A-11R-1755-07	B
TCGA-MN-A4N4-01A-12R-A24X-07	A
TCGA-44-7662-01A-11R-2066-07	C
TCGA-MP-A4T4-01A-11R-A262-07	B
TCGA-95-A4VP-01A-21R-A262-07	A
TCGA-55-8206-01A-11R-2241-07	B
TCGA-86-8585-01A-11R-2403-07	A
TCGA-95-7562-01A-11R-2241-07	C
TCGA-05-4426-01A-01R-1206-07	B
TCGA-55-8508-01A-11R-2403-07	A
TCGA-99-8025-01A-11R-2241-07	A
TCGA-44-7672-01A-11R-2066-07	A
TCGA-NJ-A4YG-01A-22R-A262-07	A
TCGA-44-8117-01A-11R-2241-07	B
TCGA-62-A46O-01A-11R-A24H-07	C
TCGA-93-A4JO-01A-21R-A24X-07	A
TCGA-44-2666-01A-01R-0946-07	B
TCGA-67-3774-01A-01R-0946-07	B
TCGA-86-8358-01A-11R-2326-07	C
TCGA-62-8394-01A-11R-2326-07	C
TCGA-MP-A4T6-01A-32R-A262-07	A
TCGA-55-8514-01A-11R-2403-07	A
TCGA-44-6147-01A-11R-A278-07	B
TCGA-64-1681-01A-11R-2066-07	A
TCGA-50-5944-01A-11R-1755-07	B
TCGA-44-A47B-01A-11R-A24H-07	C
TCGA-L4-A4E6-01A-11R-A24H-07	B
TCGA-49-AARR-01A-11R-A41B-07	B
TCGA-49-4507-01A-01R-1206-07	A
TCGA-75-7027-01A-11R-1949-07	A
TCGA-38-4625-01A-01R-1206-07	C
TCGA-44-8120-01A-11R-2241-07	B
TCGA-44-6776-01A-11R-1858-07	B
TCGA-62-8402-01A-11R-2326-07	C
TCGA-75-5125-01A-01R-1755-07	C
TCGA-64-1678-01A-01R-0946-07	A
TCGA-50-5066-02A-11R-2090-07	C
TCGA-97-7554-01A-11R-2039-07	B
TCGA-78-7167-01A-11R-2066-07	B
TCGA-50-6595-01A-12R-1858-07	C
TCGA-64-1677-01A-01R-0946-07	C
TCGA-97-A4M6-01A-11R-A24X-07	A
TCGA-97-8547-01A-11R-2403-07	A
TCGA-62-A470-01A-11R-A24H-07	A
TCGA-62-8395-01A-11R-2326-07	B
TCGA-55-7727-01A-11R-2170-07	B
TCGA-73-4675-01A-01R-1206-07	B
TCGA-44-2668-01A-01R-0946-07	C
TCGA-38-4628-01A-01R-1206-07	A
TCGA-O1-A52J-01A-11R-A262-07	B
TCGA-05-4396-01A-21R-1858-07	B
TCGA-44-7660-01A-11R-2066-07	C
TCGA-86-8279-01A-11R-2287-07	A
TCGA-97-7937-01A-11R-2170-07	C
TCGA-05-5420-01A-01R-1628-07	C
TCGA-78-7542-01A-21R-2066-07	C
TCGA-67-3771-01A-01R-0946-07	C
TCGA-38-7271-01A-11R-2039-07	B
TCGA-78-7163-01A-12R-2066-07	B
TCGA-73-4658-01A-01R-1755-07	B
TCGA-97-8171-01A-11R-2287-07	A
TCGA-44-6148-01A-11R-1755-07	B
TCGA-MP-A4T7-01A-11R-A24X-07	B
TCGA-49-4514-01A-21R-1858-07	A
TCGA-50-5946-01A-11R-1755-07	C
TCGA-55-8621-01A-11R-2403-07	B
TCGA-55-8614-01A-11R-2403-07	C
TCGA-71-8520-01A-11R-2403-07	A
TCGA-69-7978-01A-11R-2187-07	C
TCGA-L9-A443-01A-12R-A24H-07	A
TCGA-55-7573-01A-11R-2039-07	B
TCGA-78-7154-01A-11R-2039-07	C
TCGA-44-3918-01B-02R-A277-07	B
TCGA-S2-AA1A-01A-12R-A39D-07	B
TCGA-05-5423-01A-01R-1628-07	A
TCGA-50-6591-01A-11R-1755-07	C
TCGA-49-4505-01A-01R-1206-07	A
TCGA-97-8552-01A-11R-2403-07	A
TCGA-MP-A4TJ-01A-51R-A262-07	B
TCGA-73-4670-01A-01R-1206-07	A
TCGA-55-A493-01A-11R-A24H-07	C
TCGA-49-6745-01A-11R-1858-07	C
TCGA-38-4631-01A-01R-1755-07	C
TCGA-38-4626-01A-01R-1206-07	B
TCGA-44-6147-01B-06R-A277-07	B
TCGA-55-7227-01A-11R-2039-07	B
TCGA-55-A57B-01A-12R-A39D-07	B
TCGA-69-7979-01A-11R-2187-07	A
TCGA-44-A4SS-01A-11R-A24X-07	C
TCGA-05-4424-01A-22R-1858-07	C
TCGA-MN-A4N5-01A-11R-A24X-07	B
TCGA-99-8028-01A-11R-2241-07	B
TCGA-75-5146-01A-01R-1628-07	A
TCGA-55-1596-01A-01R-0946-07	C
TCGA-55-7910-01A-11R-2170-07	A
TCGA-80-5611-01A-01R-1628-07	C
TCGA-91-6828-01A-11R-1858-07	C
TCGA-69-7761-01A-11R-2170-07	C
TCGA-91-6849-01A-11R-1949-07	B
TCGA-MP-A4TH-01A-31R-A262-07	B
TCGA-44-7669-01A-21R-2066-07	C
TCGA-44-2662-01A-01R-A278-07	C
TCGA-73-7499-01A-11R-2187-07	C
TCGA-55-8505-01A-11R-2403-07	C
TCGA-86-8671-01A-11R-2403-07	B
TCGA-95-7948-01A-11R-2187-07	A
TCGA-95-7043-01A-11R-1949-07	C
TCGA-50-5044-01A-21R-1858-07	C
TCGA-J2-A4AG-01A-11R-A24H-07	A
TCGA-86-7955-01A-11R-2187-07	C
TCGA-62-A472-01A-11R-A24H-07	C
TCGA-44-6146-01A-11R-1755-07	B
TCGA-MP-A4SV-01A-11R-A24X-07	C
TCGA-49-AARN-01A-21R-A41B-07	A
TCGA-50-5072-01A-21R-1858-07	C
TCGA-55-5899-01A-11R-1628-07	A
TCGA-97-A4LX-01A-11R-A24X-07	B
TCGA-L9-A444-01A-21R-A24H-07	B
TCGA-55-8615-01A-11R-2403-07	A
TCGA-50-7109-01A-11R-2039-07	C
TCGA-91-7771-01A-11R-2170-07	B
TCGA-97-A4M1-01A-11R-A24X-07	A
TCGA-44-5644-01A-21R-2039-07	C
TCGA-78-7536-01A-11R-2066-07	C
TCGA-MP-A4TI-01A-21R-A24X-07	C
TCGA-05-4403-01A-01R-1206-07	B
TCGA-44-2666-01B-02R-A277-07	B
TCGA-99-7458-01A-11R-2039-07	B
TCGA-64-5778-01A-01R-1628-07	A
TCGA-78-7145-01A-11R-2039-07	C
TCGA-NJ-A4YP-01A-11R-A262-07	A
TCGA-55-7283-01A-11R-2039-07	A
TCGA-55-8208-01A-11R-2241-07	C
TCGA-78-7537-01A-11R-2066-07	B
TCGA-78-7166-01A-12R-2066-07	A
TCGA-55-7995-01A-11R-2187-07	C
TCGA-49-4494-01A-01R-1206-07	A
TCGA-49-4501-01A-01R-1206-07	A
TCGA-91-6847-01A-11R-1949-07	C
TCGA-75-5126-01A-01R-1755-07	C
TCGA-86-A4JF-01A-11R-A24X-07	A
TCGA-49-AAR2-01A-11R-A39D-07	A
TCGA-75-6211-01A-11R-1755-07	A
TCGA-78-7159-01A-11R-2039-07	C
TCGA-55-6971-01A-11R-1949-07	B
TCGA-50-5933-01A-11R-1755-07	C
TCGA-95-A4VK-01A-11R-A262-07	B
TCGA-64-5779-01A-01R-1628-07	C
TCGA-05-4410-01A-21R-1858-07	B
TCGA-44-A47G-01A-21R-A24H-07	B
TCGA-97-8179-01A-11R-2287-07	A
TCGA-78-7155-01A-11R-2039-07	C
TCGA-75-6206-01A-11R-1755-07	B
TCGA-05-4418-01A-01R-1206-07	C
TCGA-44-2661-01A-01R-1107-07	B
TCGA-80-5608-01A-31R-1949-07	A
TCGA-55-6984-01A-11R-1949-07	B
TCGA-75-7031-01A-11R-1949-07	A
TCGA-99-8032-01A-11R-2241-07	A
TCGA-55-8512-01A-11R-2403-07	B
TCGA-97-A4M2-01A-12R-A24X-07	B
TCGA-50-6673-01A-11R-1949-07	B
TCGA-67-3772-01A-01R-0946-07	A
TCGA-86-7954-01A-11R-2187-07	C
TCGA-44-6775-01C-02R-A277-07	B
TCGA-L9-A743-01A-43R-A39D-07	C
TCGA-05-4433-01A-22R-1858-07	B
TCGA-91-A4BC-01A-11R-A24H-07	C
TCGA-91-6829-01A-21R-1858-07	C
TCGA-44-6779-01A-11R-1858-07	C
TCGA-05-4432-01A-01R-1206-07	A
TCGA-05-4398-01A-01R-1206-07	C
TCGA-L4-A4E5-01A-11R-A24X-07	C
TCGA-53-7624-01A-11R-2066-07	C
TCGA-55-6968-01A-11R-1949-07	C
TCGA-93-A4JP-01A-11R-A24X-07	B
TCGA-44-2655-01A-01R-0946-07	B
TCGA-55-1594-01A-01R-0946-07	C
TCGA-50-5941-01A-11R-1755-07	B
TCGA-49-6767-01A-11R-1858-07	C
TCGA-75-5122-01A-01R-1755-07	C
TCGA-78-7539-01A-11R-2066-07	B
TCGA-55-7726-01A-11R-2170-07	C
TCGA-78-7162-01A-21R-2066-07	B
TCGA-55-6979-01A-11R-1949-07	C
TCGA-86-8669-01A-11R-2403-07	A
TCGA-44-3918-01A-01R-1107-07	C
TCGA-75-6212-01A-11R-1755-07	B
TCGA-44-5645-01B-04R-A277-07	B
TCGA-44-3396-01A-01R-1206-07	A
TCGA-50-8457-01A-11R-2326-07	B
TCGA-49-AARE-01A-11R-A41B-07	C
TCGA-49-4487-01A-21R-1858-07	C
TCGA-44-6774-01A-21R-1858-07	B
TCGA-L9-A5IP-01A-21R-A39D-07	C
TCGA-69-8253-01A-11R-2287-07	B
TCGA-L9-A7SV-01A-11R-A39D-07	A
TCGA-97-8172-01A-11R-2287-07	B
TCGA-86-A4P7-01A-11R-A24X-07	A
TCGA-55-7574-01A-11R-2039-07	B
TCGA-NJ-A4YI-01A-11R-A262-07	A
TCGA-44-2668-01B-02R-A277-07	B
TCGA-55-8620-01A-11R-2403-07	C
TCGA-55-7728-01A-11R-2187-07	B
TCGA-69-7973-01A-11R-2187-07	A
TCGA-50-5932-01A-11R-1755-07	B
TCGA-05-4430-01A-02R-1206-07	A
TCGA-49-4486-01A-01R-1206-07	B
TCGA-78-8662-01A-11R-2403-07	A
TCGA-95-8039-01A-11R-2241-07	A
TCGA-MP-A4TA-01A-21R-A24X-07	C
TCGA-55-7284-01B-11R-2241-07	B
TCGA-69-7764-01A-11R-2170-07	B
TCGA-44-A4SU-01A-11R-A24X-07	A
TCGA-49-4506-01A-01R-1206-07	A
TCGA-78-7161-01A-11R-2039-07	A
TCGA-49-AAQV-01A-11R-A39D-07	A
TCGA-62-A46P-01A-11R-A24H-07	A
TCGA-49-6761-01A-31R-1949-07	C
TCGA-44-3919-01A-02R-1107-07	C
TCGA-69-7980-01A-11R-2187-07	A
TCGA-93-7348-01A-21R-2039-07	B
TCGA-75-7030-01A-11R-1949-07	B
TCGA-86-8074-01A-11R-2241-07	B
TCGA-78-7158-01A-11R-2039-07	A
TCGA-05-5425-01A-02R-1628-07	A
TCGA-91-6831-01A-11R-1858-07	C
TCGA-97-8175-01A-11R-2287-07	C
TCGA-86-8672-01A-21R-2403-07	A
TCGA-44-5645-01A-01R-A278-07	B
TCGA-50-6594-01A-11R-1755-07	C
TCGA-86-7714-01A-12R-2170-07	B
TCGA-86-6562-01A-11R-1755-07	B
TCGA-55-8090-01A-11R-2241-07	B
TCGA-55-7911-01A-11R-2170-07	C
TCGA-55-8507-01A-11R-2403-07	A
TCGA-93-8067-01A-11R-2287-07	C
TCGA-44-3918-01A-01R-A278-07	C
TCGA-97-7553-01A-21R-2039-07	B
TCGA-55-8205-01A-11R-2241-07	C
TCGA-05-4390-01A-02R-1755-07	A
TCGA-86-8668-01A-11R-2403-07	B
TCGA-62-8398-01A-11R-2326-07	A
TCGA-55-8513-01A-11R-2403-07	B
TCGA-83-5908-01A-21R-2287-07	C
TCGA-05-4422-01A-01R-1206-07	B
TCGA-44-2662-01A-01R-0946-07	C
TCGA-50-5045-01A-01R-1628-07	A
TCGA-44-6146-01B-04R-A277-07	B
TCGA-44-4112-01B-06R-A277-07	B
TCGA-91-6836-01A-21R-1858-07	C
TCGA-55-6975-01A-11R-1949-07	C
TCGA-55-A491-01A-11R-A24H-07	C
TCGA-93-7347-01A-11R-2187-07	B
TCGA-MP-A4T9-01A-11R-A24X-07	B
TCGA-49-AAR9-01A-21R-A41B-07	C
TCGA-75-6203-01A-11R-1755-07	B
TCGA-55-8091-01A-11R-2241-07	B
TCGA-97-7547-01A-11R-2039-07	B
TCGA-05-4417-01A-22R-1858-07	A
TCGA-62-A46R-01A-11R-A24H-07	B
TCGA-49-4490-01A-21R-1858-07	A
TCGA-05-4395-01A-01R-1206-07	C
TCGA-62-A46Y-01A-11R-A24H-07	B
TCGA-97-A4M7-01A-11R-A24X-07	A

## Sheet: Table S9
Table S9. The different biological pathways in distinct 5mC modification patterns by GSVA enrichment analysis
A-B
Pathway	logFC	AveExpr	t	P.Value	adj.P.Val	B
KEGG_BASE_EXCISION_REPAIR	-0.348334	-0.169471	-13.3319	6.3181e-33	1.16885e-30	64.0427
KEGG_PYRIMIDINE_METABOLISM	-0.256152	-0.134918	-10.9173	5.35765e-24	4.95582e-22	43.7625
KEGG_PROTEASOME	-0.392887	-0.186725	-9.8867	1.96748e-20	1.21328e-18	35.6773
KEGG_OXIDATIVE_PHOSPHORYLATION	-0.362491	-0.042599	-9.84562	2.70538e-20	1.25124e-18	35.3638
KEGG_PARKINSONS_DISEASE	-0.337364	-0.0537631	-9.6043	1.73121e-19	6.40546e-18	33.5373
KEGG_HUNTINGTONS_DISEASE	-0.259727	-0.073001	-9.56347	2.36407e-19	7.28922e-18	33.2308
KEGG_PHOSPHATIDYLINOSITOL_SIGNALING_SYSTEM	0.238463	-0.0201208	9.39584	8.42866e-19	2.22758e-17	31.9804
KEGG_SPLICEOSOME	-0.249822	-0.175235	-9.13469	5.95338e-18	1.37672e-16	30.0583
KEGG_DNA_REPLICATION	-0.347742	-0.280283	-9.0563	1.06384e-17	2.18677e-16	29.4878
KEGG_RNA_POLYMERASE	-0.270273	-0.109726	-8.99209	1.70785e-17	3.15952e-16	29.0226
KEGG_ALDOSTERONE_REGULATED_SODIUM_REABSORPTION	0.229759	0.0370898	8.86232	4.41801e-17	7.4303e-16	28.0888
KEGG_ALZHEIMERS_DISEASE	-0.238876	-0.0562421	-8.637	2.25588e-16	3.47781e-15	26.4876
KEGG_LONG_TERM_POTENTIATION	0.174472	-0.0137868	8.32283	2.09734e-15	2.97852e-14	24.2994
KEGG_GLYOXYLATE_AND_DICARBOXYLATE_METABOLISM	-0.274892	-0.115758	-8.31256	2.25401e-15	2.97852e-14	24.2287
KEGG_TYPE_II_DIABETES_MELLITUS	0.189216	6.03683e-05	7.90343	3.78817e-14	4.67208e-13	21.4625
KEGG_CALCIUM_SIGNALING_PATHWAY	0.174336	0.0180719	7.81226	7.01419e-14	8.11016e-13	20.859
KEGG_JAK_STAT_SIGNALING_PATHWAY	0.200456	-0.021836	7.72103	1.29309e-13	1.40719e-12	20.2601
KEGG_INOSITOL_PHOSPHATE_METABOLISM	0.191836	-0.0392846	7.60104	2.86961e-13	2.94932e-12	19.4798
KEGG_T_CELL_RECEPTOR_SIGNALING_PATHWAY	0.221831	-0.0604429	7.58486	3.1932e-13	3.10917e-12	19.3753
KEGG_ENDOMETRIAL_CANCER	0.204358	-0.0372573	7.55233	3.95655e-13	3.65981e-12	19.1655
KEGG_LONG_TERM_DEPRESSION	0.153043	-0.00407595	7.38668	1.16707e-12	1.02813e-11	18.1075
KEGG_DORSO_VENTRAL_AXIS_FORMATION	0.226349	-0.022461	7.37797	1.23474e-12	1.03492e-11	18.0524
KEGG_VASCULAR_SMOOTH_MUSCLE_CONTRACTION	0.184439	0.0212217	7.37161	1.28666e-12	1.03492e-11	18.0122
KEGG_HOMOLOGOUS_RECOMBINATION	-0.253383	-0.246223	-7.32247	1.76705e-12	1.3621e-11	17.702
KEGG_ARRHYTHMOGENIC_RIGHT_VENTRICULAR_CARDIOMYOPATHY_ARVC	0.213633	-0.00534086	7.31208	1.8893e-12	1.39808e-11	17.6366
KEGG_NEUROTROPHIN_SIGNALING_PATHWAY	0.169913	-0.0415634	7.14888	5.3555e-12	3.67378e-11	16.6186
KEGG_COLORECTAL_CANCER	0.179821	-0.0587849	7.1487	5.36173e-12	3.67378e-11	16.6175
KEGG_GNRH_SIGNALING_PATHWAY	0.15319	-0.00214291	7.11573	6.60429e-12	4.36355e-11	16.4139
KEGG_GLIOMA	0.17529	-0.0600145	7.10867	6.90548e-12	4.40522e-11	16.3704
KEGG_ADHERENS_JUNCTION	0.208851	-0.058165	7.09233	7.6548e-12	4.72046e-11	16.2698
KEGG_B_CELL_RECEPTOR_SIGNALING_PATHWAY	0.218758	-0.0364664	7.07256	8.66841e-12	5.17308e-11	16.1484
KEGG_FC_EPSILON_RI_SIGNALING_PATHWAY	0.169308	-0.016138	6.87945	2.88406e-11	1.66735e-10	14.9753
KEGG_NON_SMALL_CELL_LUNG_CANCER	0.167873	-0.062025	6.72565	7.38499e-11	4.14007e-10	14.0585
KEGG_ERBB_SIGNALING_PATHWAY	0.160136	-0.0510337	6.70105	8.57136e-11	4.66383e-10	13.9133
KEGG_DILATED_CARDIOMYOPATHY	0.193803	0.0159821	6.66547	1.06247e-10	5.6159e-10	13.7041
KEGG_MELANOGENESIS	0.138772	-0.00137038	6.6327	1.29382e-10	6.62712e-10	13.5122
KEGG_AXON_GUIDANCE	0.170485	-0.0271988	6.62868	1.32542e-10	6.62712e-10	13.4887
KEGG_MAPK_SIGNALING_PATHWAY	0.136842	-0.0149384	6.5812	1.76098e-10	8.57321e-10	13.212
KEGG_PATHWAYS_IN_CANCER	0.144512	-0.0508105	6.49228	2.98581e-10	1.41635e-09	12.698
KEGG_FOCAL_ADHESION	0.198536	-0.0294949	6.42788	4.36241e-10	2.01762e-09	12.329
KEGG_WNT_SIGNALING_PATHWAY	0.13831	-0.0168566	6.42199	4.51572e-10	2.03758e-09	12.2954
KEGG_ABC_TRANSPORTERS	0.150832	0.00316896	6.38336	5.66045e-10	2.49329e-09	12.0757
KEGG_HEDGEHOG_SIGNALING_PATHWAY	0.168717	0.00556142	6.34771	6.96621e-10	2.99709e-09	11.8738
KEGG_HYPERTROPHIC_CARDIOMYOPATHY_HCM	0.172742	0.00336948	6.28842	9.81954e-10	4.12867e-09	11.5401
KEGG_PURINE_METABOLISM	-0.116408	-0.0761891	-6.2768	1.05002e-09	4.31675e-09	11.475
KEGG_NOD_LIKE_RECEPTOR_SIGNALING_PATHWAY	0.175763	-0.0803696	6.19558	1.6729e-09	6.72796e-09	11.0225
KEGG_LEUKOCYTE_TRANSENDOTHELIAL_MIGRATION	0.17907	-0.00676842	6.1244	2.50682e-09	9.86726e-09	10.6297
KEGG_NUCLEOTIDE_EXCISION_REPAIR	-0.15952	-0.187014	-6.03217	4.21134e-09	1.62312e-08	10.1263
KEGG_CARDIAC_MUSCLE_CONTRACTION	-0.151528	0.00902972	-6.02249	4.44523e-09	1.6783e-08	10.0739
KEGG_SMALL_CELL_LUNG_CANCER	0.151295	-0.0897059	6.00218	4.97863e-09	1.84209e-08	9.96395
KEGG_REGULATION_OF_ACTIN_CYTOSKELETON	0.157689	-0.0503756	5.98086	5.60574e-09	2.03345e-08	9.8489
KEGG_BASAL_CELL_CARCINOMA	0.155983	0.0262055	5.94379	6.8844e-09	2.44926e-08	9.64969
KEGG_CHEMOKINE_SIGNALING_PATHWAY	0.176768	-0.0446145	5.8788	9.84703e-09	3.43717e-08	9.30281
KEGG_CELL_CYCLE	-0.168114	-0.223984	-5.80802	1.44906e-08	4.96438e-08	8.92861
KEGG_ACUTE_MYELOID_LEUKEMIA	0.162585	-0.0438171	5.76925	1.7878e-08	6.01351e-08	8.72524
KEGG_PORPHYRIN_AND_CHLOROPHYLL_METABOLISM	-0.151219	0.0125577	-5.70901	2.47267e-08	8.16866e-08	8.41139
KEGG_CELL_ADHESION_MOLECULES_CAMS	0.19799	0.0226018	5.63321	3.70475e-08	1.18704e-07	8.02037
KEGG_MISMATCH_REPAIR	-0.199815	-0.254532	-5.63236	3.72152e-08	1.18704e-07	8.01601
KEGG_TGF_BETA_SIGNALING_PATHWAY	0.141987	-0.0272604	5.58759	4.71572e-08	1.47866e-07	7.78716
KEGG_MELANOMA	0.137901	-0.0403634	5.56933	5.1917e-08	1.60078e-07	7.69424
KEGG_RIBOSOME	-0.328417	0.0047545	-5.54318	5.95598e-08	1.80632e-07	7.56157
KEGG_ECM_RECEPTOR_INTERACTION	0.204598	-0.0160281	5.53226	6.30618e-08	1.88168e-07	7.50638
KEGG_CHRONIC_MYELOID_LEUKEMIA	0.143161	-0.078397	5.5111	7.04351e-08	2.06833e-07	7.3996
KEGG_APOPTOSIS	0.135031	-0.0397285	5.50554	7.2508e-08	2.09593e-07	7.37159
KEGG_NATURAL_KILLER_CELL_MEDIATED_CYTOTOXICITY	0.16943	-0.0453345	5.46967	8.73737e-08	2.48679e-07	7.19155
KEGG_TOLL_LIKE_RECEPTOR_SIGNALING_PATHWAY	0.155452	-0.0573973	5.4613	9.12487e-08	2.55773e-07	7.14966
KEGG_COMPLEMENT_AND_COAGULATION_CASCADES	0.164922	0.0455542	5.41052	1.18586e-07	3.2744e-07	6.89682
KEGG_CIRCADIAN_RHYTHM_MAMMAL	0.180016	0.0115561	5.37137	1.44949e-07	3.94348e-07	6.70322
KEGG_RENAL_CELL_CARCINOMA	0.140076	-0.0764259	5.35303	1.59176e-07	4.26777e-07	6.61295
KEGG_PROSTATE_CANCER	0.131046	-0.0630523	5.3431	1.6744e-07	4.36533e-07	6.56416
KEGG_GLUTATHIONE_METABOLISM	-0.162724	-0.0430188	-5.34286	1.67643e-07	4.36533e-07	6.56299
KEGG_ENDOCYTOSIS	0.123089	-0.0428978	5.33856	1.71356e-07	4.36533e-07	6.54188
KEGG_BASAL_TRANSCRIPTION_FACTORS	-0.139302	-0.158673	-5.33753	1.72253e-07	4.36533e-07	6.53684
KEGG_HEMATOPOIETIC_CELL_LINEAGE	0.198446	0.012698	5.26275	2.51475e-07	6.28688e-07	6.1723
KEGG_NEUROACTIVE_LIGAND_RECEPTOR_INTERACTION	0.117051	0.0308323	5.25266	2.64564e-07	6.52591e-07	6.12344
KEGG_TIGHT_JUNCTION	0.115422	-0.00924804	5.24121	2.80218e-07	6.82109e-07	6.06809
KEGG_LEISHMANIA_INFECTION	0.200996	-0.0156593	5.13911	4.65763e-07	1.11904e-06	5.57917
KEGG_FC_GAMMA_R_MEDIATED_PHAGOCYTOSIS	0.142893	-0.0648571	5.07327	6.43638e-07	1.52658e-06	5.26825
KEGG_VEGF_SIGNALING_PATHWAY	0.105037	-0.0173486	5.01312	8.62412e-07	2.01957e-06	4.98722
KEGG_ADIPOCYTOKINE_SIGNALING_PATHWAY	0.109262	-0.0301178	4.94088	1.22103e-06	2.82364e-06	4.65354
KEGG_PENTOSE_PHOSPHATE_PATHWAY	-0.153418	-0.0899761	-4.86264	1.77142e-06	4.04585e-06	4.29684
KEGG_CYSTEINE_AND_METHIONINE_METABOLISM	-0.118318	-0.0994439	-4.84627	1.91371e-06	4.31751e-06	4.22283
KEGG_PANCREATIC_CANCER	0.128795	-0.0858991	4.8333	2.03417e-06	4.53398e-06	4.16436
KEGG_DRUG_METABOLISM_OTHER_ENZYMES	-0.105819	-0.00670934	-4.73738	3.18205e-06	7.00808e-06	3.73615
KEGG_GAP_JUNCTION	0.117434	-0.0438224	4.62347	5.36313e-06	1.16727e-05	3.23737
KEGG_INTESTINAL_IMMUNE_NETWORK_FOR_IGA_PRODUCTION	0.215355	0.00871969	4.60043	5.95279e-06	1.28054e-05	3.13781
KEGG_CYTOKINE_CYTOKINE_RECEPTOR_INTERACTION	0.143065	-0.0203159	4.57699	6.61664e-06	1.40699e-05	3.03694
KEGG_RNA_DEGRADATION	-0.115563	-0.153486	-4.53162	8.10921e-06	1.70478e-05	2.84298
KEGG_FOLATE_BIOSYNTHESIS	-0.166374	-0.039971	-4.28913	2.33868e-05	4.8613e-05	1.83566
KEGG_ONE_CARBON_POOL_BY_FOLATE	-0.138533	-0.140222	-4.22705	3.04392e-05	6.18819e-05	1.58575
KEGG_PROTEIN_EXPORT	-0.173244	-0.0953609	-4.20173	3.38633e-05	6.80948e-05	1.48476
KEGG_AMINOACYL_TRNA_BIOSYNTHESIS	-0.153227	-0.13009	-4.17002	3.86711e-05	7.69264e-05	1.35906
KEGG_RENIN_ANGIOTENSIN_SYSTEM	0.13181	0.0121908	4.15451	4.12537e-05	8.03361e-05	1.29788
KEGG_ARGININE_AND_PROLINE_METABOLISM	-0.109228	-0.0129102	-4.07009	5.84489e-05	0.000112636	0.968539
KEGG_GLYCOSPHINGOLIPID_BIOSYNTHESIS_GANGLIO_SERIES	0.133181	0.0346019	4.04636	6.43955e-05	0.000122816	0.877064
KEGG_AUTOIMMUNE_THYROID_DISEASE	0.173361	0.0264881	3.99127	8.04931e-05	0.000150416	0.666604
KEGG_VASOPRESSIN_REGULATED_WATER_REABSORPTION	0.101035	-0.0107814	3.96323	9.00906e-05	0.000166668	0.56046
KEGG_PYRUVATE_METABOLISM	-0.10983	-0.0553442	-3.87964	0.00012555	0.000225502	0.248164
KEGG_ALLOGRAFT_REJECTION	0.206373	0.00979073	3.87525	0.000127737	0.000227225	0.231929
KEGG_ASTHMA	0.189942	0.0478152	3.86278	0.000134151	0.000236361	0.185894
KEGG_TERPENOID_BACKBONE_BIOSYNTHESIS	-0.155947	-0.0601867	-3.77928	0.000185601	0.000323927	-0.118771
KEGG_GLYCOSAMINOGLYCAN_DEGRADATION	0.120747	0.0242791	3.63244	0.000323906	0.000554838	-0.639665
KEGG_CITRATE_CYCLE_TCA_CYCLE	-0.13818	-0.0892514	-3.61332	0.000347798	0.000590299	-0.706072
KEGG_PRIMARY_IMMUNODEFICIENCY	0.168441	-0.0630888	3.48232	0.000561792	0.000944831	-1.15242
KEGG_GRAFT_VERSUS_HOST_DISEASE	0.17805	-0.00513349	3.46275	0.000602749	0.00100458	-1.21775
KEGG_LYSOSOME	0.104276	0.00640703	3.36254	0.000860022	0.00139565	-1.54708
KEGG_STEROID_BIOSYNTHESIS	-0.136782	-0.0300498	-3.25759	0.00123657	0.00198927	-1.88223
KEGG_TYPE_I_DIABETES_MELLITUS	0.143994	-0.00262507	3.11584	0.00198987	0.00306772	-2.31907
A-C
Pathway	logFC	AveExpr	t	P.Value	adj.P.Val	B
KEGG_CELL_CYCLE	0.39189	0.0942112	14.4048	7.96071e-37	1.47273e-34	72.9368
KEGG_MISMATCH_REPAIR	0.447572	0.113393	12.4649	1.76387e-29	1.63158e-27	56.2172
KEGG_HOMOLOGOUS_RECOMBINATION	0.39214	0.121425	11.7727	6.06677e-27	3.74118e-25	50.4472
KEGG_DNA_REPLICATION	0.457308	0.178679	11.7239	9.11475e-27	4.21557e-25	50.0452
KEGG_ALPHA_LINOLENIC_ACID_METABOLISM	-0.27249	-0.0872665	-11.4894	6.37837e-26	2.36e-24	48.1238
KEGG_OOCYTE_MEIOSIS	0.242458	0.0267329	10.7288	3.12799e-23	9.64463e-22	42.0084
KEGG_ARACHIDONIC_ACID_METABOLISM	-0.226059	-0.0753516	-10.1997	2.06832e-21	5.46628e-20	37.8739
KEGG_NUCLEOTIDE_EXCISION_REPAIR	0.275804	0.0607548	10.0879	4.95117e-21	1.14496e-19	37.0132
KEGG_PROGESTERONE_MEDIATED_OOCYTE_MATURATION	0.220984	-0.00273155	10.0236	8.16052e-21	1.67744e-19	36.5206
KEGG_UBIQUITIN_MEDIATED_PROTEOLYSIS	0.209751	-0.00654169	9.81555	4.06073e-20	7.51234e-19	34.9391
KEGG_RNA_DEGRADATION	0.234485	0.0455635	9.11868	7.67483e-18	1.29077e-16	29.7768
KEGG_SMALL_CELL_LUNG_CANCER	0.224578	-0.0505706	8.86269	4.98095e-17	7.67897e-16	27.9366
KEGG_LINOLEIC_ACID_METABOLISM	-0.221965	-0.0803873	-8.61891	2.87117e-16	4.0249e-15	26.2142
KEGG_BASAL_TRANSCRIPTION_FACTORS	0.229796	0.0514608	8.61062	3.04587e-16	4.0249e-15	26.1561
KEGG_P53_SIGNALING_PATHWAY	0.185346	0.00369534	8.43073	1.08756e-15	1.34133e-14	24.9054
KEGG_NON_HOMOLOGOUS_END_JOINING	0.260084	-0.00590009	7.53735	4.68125e-13	5.4127e-12	18.9551
KEGG_SPLICEOSOME	0.216453	0.0912907	7.1571	5.38706e-12	5.86239e-11	16.5639
KEGG_PANCREATIC_CANCER	0.187375	-0.0547293	6.97699	1.66182e-11	1.70798e-10	15.4628
KEGG_NOD_LIKE_RECEPTOR_SIGNALING_PATHWAY	0.213387	-0.0616946	6.88554	2.92148e-11	2.8446e-10	14.9117
KEGG_TAURINE_AND_HYPOTAURINE_METABOLISM	-0.200534	-0.102449	-6.67758	1.03329e-10	9.37902e-10	13.6787
KEGG_PRIMARY_BILE_ACID_BIOSYNTHESIS	-0.206411	-0.101433	-6.67261	1.06465e-10	9.37902e-10	13.6495
KEGG_REGULATION_OF_AUTOPHAGY	0.130444	-0.00849732	6.59232	1.72047e-10	1.44676e-09	13.1815
KEGG_RENAL_CELL_CARCINOMA	0.172021	-0.0604376	6.51356	2.74374e-10	2.20692e-09	12.7265
KEGG_CHRONIC_MYELOID_LEUKEMIA	0.176437	-0.0617023	6.41819	4.80197e-10	3.70152e-09	12.1813
KEGG_GLIOMA	0.161672	-0.0702266	6.4063	5.14683e-10	3.80865e-09	12.1137
KEGG_T_CELL_RECEPTOR_SIGNALING_PATHWAY	0.190237	-0.081463	6.13625	2.42345e-09	1.72438e-08	10.6062
KEGG_CARDIAC_MUSCLE_CONTRACTION	-0.153071	0.0103494	-6.05995	3.72091e-09	2.48635e-08	10.1896
KEGG_NON_SMALL_CELL_LUNG_CANCER	0.15414	-0.0721943	6.05793	3.76313e-09	2.48635e-08	10.1786
KEGG_ADHERENS_JUNCTION	0.171935	-0.0819986	5.66635	3.18449e-08	2.03148e-07	8.10732
KEGG_ERBB_SIGNALING_PATHWAY	0.138895	-0.0653246	5.61119	4.26455e-08	2.6298e-07	7.82464
KEGG_ARGININE_AND_PROLINE_METABOLISM	-0.138527	-0.0278526	-5.58284	4.95089e-08	2.95456e-07	7.68025
KEGG_PATHWAYS_IN_CANCER	0.123682	-0.0646439	5.55683	5.67437e-08	3.28049e-07	7.54831
KEGG_REGULATION_OF_ACTIN_CYTOSKELETON	0.144161	-0.0602822	5.51423	7.08762e-08	3.8565e-07	7.33327
KEGG_PROSTATE_CANCER	0.133402	-0.0636178	5.41661	1.1738e-07	6.2044e-07	6.84579
KEGG_TOLL_LIKE_RECEPTOR_SIGNALING_PATHWAY	0.161155	-0.0564276	5.40793	1.2273e-07	6.27503e-07	6.80275
KEGG_COLORECTAL_CANCER	0.141862	-0.0827868	5.40357	1.25501e-07	6.27503e-07	6.78119
KEGG_SULFUR_METABOLISM	-0.166581	-0.0694291	-5.37517	1.45114e-07	6.96899e-07	6.64098
KEGG_ONE_CARBON_POOL_BY_FOLATE	0.17148	0.0365844	5.37275	1.46914e-07	6.96899e-07	6.62909
KEGG_PROTEASOME	0.211768	0.159895	5.25505	2.66393e-07	1.21197e-06	6.05496
KEGG_FC_GAMMA_R_MEDIATED_PHAGOCYTOSIS	0.146677	-0.0647886	5.25341	2.68599e-07	1.21197e-06	6.04701
KEGG_HISTIDINE_METABOLISM	-0.129858	-0.0674494	-5.08079	6.30841e-07	2.7787e-06	5.22471
KEGG_NITROGEN_METABOLISM	-0.131628	-0.0644271	-5.0473	7.4257e-07	3.19478e-06	5.06787
KEGG_NATURAL_KILLER_CELL_MEDIATED_CYTOTOXICITY	0.158576	-0.0539027	4.99511	9.55766e-07	4.01856e-06	4.82524
KEGG_RIG_I_LIKE_RECEPTOR_SIGNALING_PATHWAY	0.117199	-0.0338494	4.93802	1.25662e-06	5.16609e-06	4.56236
KEGG_NEUROTROPHIN_SIGNALING_PATHWAY	0.119347	-0.0725308	4.86384	1.78666e-06	7.18547e-06	4.2246
KEGG_PATHOGENIC_ESCHERICHIA_COLI_INFECTION	0.138021	0.00884839	4.7426	3.14665e-06	1.23857e-05	3.68217
KEGG_TYROSINE_METABOLISM	-0.113737	-0.03464	-4.68031	4.19001e-06	1.6149e-05	3.4081
KEGG_OXIDATIVE_PHOSPHORYLATION	-0.181709	0.0645755	-4.66041	4.5884e-06	1.73236e-05	3.32123
KEGG_LYSINE_DEGRADATION	0.126334	-0.0217957	4.63415	5.1704e-06	1.91305e-05	3.20705
KEGG_GAP_JUNCTION	0.111592	-0.0488135	4.60278	5.95889e-06	2.16156e-05	3.07142
KEGG_DORSO_VENTRAL_AXIS_FORMATION	0.140092	-0.074369	4.5947	6.17993e-06	2.19863e-05	3.03662
KEGG_DRUG_METABOLISM_CYTOCHROME_P450	-0.133286	-0.0330676	-4.57229	6.83511e-06	2.38584e-05	2.94039
KEGG_RIBOSOME	-0.26416	0.0457321	-4.43939	1.23242e-05	4.22219e-05	2.37813
KEGG_MELANOMA	0.104523	-0.0611769	4.34843	1.83009e-05	6.15575e-05	2.00179
KEGG_ENDOMETRIAL_CANCER	0.118799	-0.088454	4.28034	2.44977e-05	7.96062e-05	1.72463
KEGG_PEROXISOME	-0.117037	-0.0594977	-4.28006	2.45273e-05	7.96062e-05	1.72348
KEGG_CHEMOKINE_SIGNALING_PATHWAY	0.129541	-0.0737984	4.20781	3.32856e-05	0.00010617	1.4337
KEGG_BASE_EXCISION_REPAIR	0.119504	0.0993594	4.18162	3.71442e-05	0.000116469	1.32972
KEGG_B_CELL_RECEPTOR_SIGNALING_PATHWAY	0.132937	-0.0880192	4.16933	3.90979e-05	0.000120552	1.28114
KEGG_INOSITOL_PHOSPHATE_METABOLISM	0.110271	-0.0880483	4.15363	4.17373e-05	0.00012658	1.21925
KEGG_THYROID_CANCER	0.109761	-0.0511837	4.12678	4.66482e-05	0.000139192	1.11391
KEGG_CYSTEINE_AND_METHIONINE_METABOLISM	0.101313	0.0261076	4.09818	5.24824e-05	0.000154115	1.00239
KEGG_METABOLISM_OF_XENOBIOTICS_BY_CYTOCHROME_P450	-0.125834	-0.015633	-4.0495	6.40401e-05	0.000185116	0.814202
KEGG_JAK_STAT_SIGNALING_PATHWAY	0.108363	-0.0766605	3.97904	8.51305e-05	0.000242294	0.545411
KEGG_PHOSPHATIDYLINOSITOL_SIGNALING_SYSTEM	0.104554	-0.0990725	3.90972	0.000112206	0.000314516	0.285116
KEGG_ACUTE_MYELOID_LEUKEMIA	0.107511	-0.0772206	3.73414	0.000221869	0.000603613	-0.355435
KEGG_PRIMARY_IMMUNODEFICIENCY	0.179804	-0.0591155	3.71731	0.000236536	0.00063419	-0.415419
KEGG_PARKINSONS_DISEASE	-0.138098	0.0634703	-3.70067	0.000251935	0.00065645	-0.474491
KEGG_AMINOACYL_TRNA_BIOSYNTHESIS	0.130313	0.0320018	3.63763	0.000319246	0.000809047	-0.696
KEGG_GLYCOSPHINGOLIPID_BIOSYNTHESIS_GANGLIO_SERIES	-0.119768	-0.109951	-3.61803	0.000343408	0.000857825	-0.764164
KEGG_PRION_DISEASES	0.104115	-0.0215195	3.61463	0.000347767	0.000857825	-0.775944
KEGG_FATTY_ACID_METABOLISM	-0.10827	-0.0833465	-3.57663	0.0004002	0.00097417	-0.907014
KEGG_FOCAL_ADHESION	0.111586	-0.0813918	3.49759	0.000533898	0.00125027	-1.17553
KEGG_PHENYLALANINE_METABOLISM	-0.1068	-0.0134306	-3.45108	0.000631058	0.00142373	-1.33095
KEGG_ANTIGEN_PROCESSING_AND_PRESENTATION	0.109778	-0.0217153	3.00388	0.00286979	0.00610242	-2.72559
KEGG_LIMONENE_AND_PINENE_DEGRADATION	-0.10107	-0.0879269	-2.74162	0.00644751	0.0128257	-3.45834
Pathway
id	logFC	AveExpr	t	P.Value	adj.P.Val	B
KEGG_DNA_REPLICATION	0.80505	-0.0362673	25.6254	5.81315e-85	1.07543e-82	183.139
KEGG_CELL_CYCLE	0.560005	-0.0231308	24.686	4.28192e-81	3.96077e-79	174.269
KEGG_HOMOLOGOUS_RECOMBINATION	0.645523	-0.0398284	22.0863	3.15899e-70	1.94804e-68	149.338
KEGG_MISMATCH_REPAIR	0.647387	-0.0246437	21.7293	1.01649e-68	4.70126e-67	145.879
KEGG_BASE_EXCISION_REPAIR	0.467838	-0.0893378	19.005	3.7469e-57	1.38635e-55	119.343
KEGG_NUCLEOTIDE_EXCISION_REPAIR	0.435325	-0.043038	18.0399	4.71333e-53	1.45328e-51	109.939
KEGG_SPLICEOSOME	0.466276	-0.0543192	17.6865	1.48194e-51	3.91654e-50	106.504
KEGG_PROTEASOME	0.604655	-0.0589885	17.1264	3.46048e-49	8.00235e-48	101.073
KEGG_PYRIMIDINE_METABOLISM	0.347231	-0.0744386	16.1174	6.00391e-45	1.23414e-43	91.3516
KEGG_BASAL_TRANSCRIPTION_FACTORS	0.369098	-0.0383083	15.2682	2.04071e-41	3.77532e-40	83.2564
KEGG_RNA_DEGRADATION	0.350049	-0.0323547	14.7423	2.98337e-39	5.01749e-38	78.2949
KEGG_OOCYTE_MEIOSIS	0.278212	-0.0107303	14.4929	3.12044e-38	4.81068e-37	75.9589
KEGG_ARACHIDONIC_ACID_METABOLISM	-0.248811	-0.0458703	-11.2936	1.03065e-25	1.4667e-24	47.306
KEGG_ALDOSTERONE_REGULATED_SODIUM_REABSORPTION	-0.269954	0.00297993	-11.1858	2.57866e-25	3.14726e-24	46.3959
KEGG_ALPHA_LINOLENIC_ACID_METABOLISM	-0.266925	-0.0687113	-11.1853	2.58938e-25	3.14726e-24	46.3918
KEGG_P53_SIGNALING_PATHWAY	0.228663	-0.0331717	11.1795	2.72196e-25	3.14726e-24	46.3422
KEGG_UBIQUITIN_MEDIATED_PROTEOLYSIS	0.212304	-0.0243443	11.0114	1.12701e-24	1.22646e-23	44.9324
KEGG_PRIMARY_BILE_ACID_BIOSYNTHESIS	-0.304623	-0.0346532	-10.9066	2.71924e-24	2.79477e-23	44.0586
KEGG_ONE_CARBON_POOL_BY_FOLATE	0.310013	-0.0482046	10.7842	7.56614e-24	7.36703e-23	43.0435
KEGG_GLYOXYLATE_AND_DICARBOXYLATE_METABOLISM	0.313114	-0.0797359	10.3139	3.64349e-22	3.37023e-21	39.202
KEGG_RNA_POLYMERASE	0.292352	-0.0818317	10.2946	4.2648e-22	3.75709e-21	39.046
KEGG_PROGESTERONE_MEDIATED_OOCYTE_MATURATION	0.200751	-0.00968802	10.2571	5.78434e-22	4.8641e-21	38.7439
KEGG_LINOLEIC_ACID_METABOLISM	-0.248215	-0.0494269	-10.1317	1.59436e-21	1.28242e-20	37.7392
KEGG_CYSTEINE_AND_METHIONINE_METABOLISM	0.219631	-0.0427599	10.0294	3.62824e-21	2.79677e-20	36.9245
KEGG_TAURINE_AND_HYPOTAURINE_METABOLISM	-0.272786	-0.0494943	-9.24914	1.63496e-18	1.20987e-17	30.8756
KEGG_BASAL_CELL_CARCINOMA	-0.223005	-0.0162326	-9.11483	4.54204e-18	3.23184e-17	29.8651
KEGG_VASCULAR_SMOOTH_MUSCLE_CONTRACTION	-0.210363	-0.00308234	-9.09582	5.24489e-18	3.59372e-17	29.7228
KEGG_AMINOACYL_TRNA_BIOSYNTHESIS	0.28354	-0.0571147	8.74038	7.46184e-17	4.93015e-16	27.0988
KEGG_PURINE_METABOLISM	0.144429	-0.055192	8.39552	9.18822e-16	5.86145e-15	24.6198
KEGG_GLYCOSPHINGOLIPID_BIOSYNTHESIS_GANGLIO_SERIES	-0.252949	-0.031982	-8.26023	2.41589e-15	1.4898e-14	23.666
KEGG_NON_HOMOLOGOUS_END_JOINING	0.242625	-0.0173581	8.05999	9.90999e-15	5.91403e-14	22.2741
KEGG_ETHER_LIPID_METABOLISM	-0.171141	-0.0366863	-8.03757	1.15892e-14	6.69998e-14	22.1198
KEGG_PPAR_SIGNALING_PATHWAY	-0.166159	-0.0207159	-7.91184	2.77325e-14	1.5547e-13	21.26
KEGG_CALCIUM_SIGNALING_PATHWAY	-0.165146	0.0114491	-7.88969	3.23085e-14	1.75796e-13	21.1095
KEGG_HUNTINGTONS_DISEASE	0.20332	-0.0838623	7.7243	1.00118e-13	5.29193e-13	19.9956
KEGG_PENTOSE_PHOSPHATE_PATHWAY	0.238714	-0.0388333	7.71915	1.03674e-13	5.3277e-13	19.9612
KEGG_CIRCADIAN_RHYTHM_MAMMAL	-0.234235	-0.0261975	-7.4168	7.83862e-13	3.91931e-12	17.9708
KEGG_COMPLEMENT_AND_COAGULATION_CASCADES	-0.219447	0.00861197	-7.23612	2.55437e-12	1.24358e-11	16.8096
KEGG_GNRH_SIGNALING_PATHWAY	-0.13559	-0.00334058	-6.976	1.34793e-11	6.39404e-11	15.1765
KEGG_HEDGEHOG_SIGNALING_PATHWAY	-0.170817	-0.00618224	-6.94421	1.6468e-11	7.61645e-11	14.98
KEGG_PATHOGENIC_ESCHERICHIA_COLI_INFECTION	0.19248	-0.0300336	6.92026	1.9141e-11	8.63678e-11	14.8324
KEGG_ABC_TRANSPORTERS	-0.15823	-0.0100093	-6.90586	2.09482e-11	9.2272e-11	14.7439
KEGG_LONG_TERM_DEPRESSION	-0.131148	-0.00317994	-6.8559	2.86183e-11	1.23125e-10	14.4379
KEGG_DRUG_METABOLISM_CYTOCHROME_P450	-0.174648	-0.00129921	-6.55178	1.84336e-10	7.75048e-10	12.613
KEGG_MELANOGENESIS	-0.128645	-0.00527767	-6.53337	2.05919e-10	8.46554e-10	12.5047
KEGG_FATTY_ACID_METABOLISM	-0.186594	-0.0345187	-6.44362	3.52064e-10	1.41591e-09	11.9799
KEGG_DILATED_CARDIOMYOPATHY	-0.178011	0.0113255	-6.41739	4.1138e-10	1.61926e-09	11.8276
KEGG_NEUROACTIVE_LIGAND_RECEPTOR_INTERACTION	-0.12931	0.0174428	-6.18319	1.61643e-09	6.22998e-09	10.4904
KEGG_GLYCOSAMINOGLYCAN_DEGRADATION	-0.200309	-0.0220046	-6.16423	1.80273e-09	6.80624e-09	10.3839
KEGG_NITROGEN_METABOLISM	-0.140663	-0.0494297	-6.08935	2.76637e-09	1.02356e-08	9.966
KEGG_PARKINSONS_DISEASE	0.199265	-0.0993305	5.82319	1.22639e-08	4.31239e-08	8.5147
KEGG_N_GLYCAN_BIOSYNTHESIS	0.152669	-0.052923	5.82185	1.23544e-08	4.31239e-08	8.50754
KEGG_CELL_ADHESION_MOLECULES_CAMS	-0.193673	0.0121106	-5.81254	1.30029e-08	4.45471e-08	8.45774
KEGG_ALZHEIMERS_DISEASE	0.154235	-0.0821296	5.79733	1.41341e-08	4.7542e-08	8.37655
KEGG_HYPERTROPHIC_CARDIOMYOPATHY_HCM	-0.152919	0.00200789	-5.76294	1.70565e-08	5.63473e-08	8.19366
KEGG_CITRATE_CYCLE_TCA_CYCLE	0.202609	-0.0492034	5.7168	2.19173e-08	7.1135e-08	7.94974
KEGG_TYPE_II_DIABETES_MELLITUS	-0.123759	0.0197955	-5.70653	2.31699e-08	7.3904e-08	7.89569
KEGG_PHOSPHATIDYLINOSITOL_SIGNALING_SYSTEM	-0.133908	0.0154561	-5.64875	3.16328e-08	9.91875e-08	7.593
KEGG_LYSOSOME	-0.167571	-0.0309355	-5.61278	3.83501e-08	1.18246e-07	7.40588
KEGG_PROTEIN_EXPORT	0.213995	-0.0645734	5.59472	4.22277e-08	1.28068e-07	7.3123
KEGG_LYSINE_DEGRADATION	0.132338	-0.0348172	5.5621	5.02198e-08	1.49849e-07	7.14395
KEGG_ASTHMA	-0.25149	0.0058745	-5.55774	5.13947e-08	1.50921e-07	7.12149
KEGG_PROXIMAL_TUBULE_BICARBONATE_RECLAMATION	-0.141273	-0.0195958	-5.51531	6.43045e-08	1.8588e-07	6.90392
KEGG_FC_EPSILON_RI_SIGNALING_PATHWAY	-0.127159	-0.0064477	-5.38808	1.24886e-07	3.55445e-07	6.26005
KEGG_HISTIDINE_METABOLISM	-0.135149	-0.0545177	-5.33151	1.67099e-07	4.68384e-07	5.97788
KEGG_GLYCOLYSIS_GLUCONEOGENESIS	0.134261	-0.0168951	5.20503	3.1756e-07	8.76845e-07	5.35632
KEGG_CYTOSOLIC_DNA_SENSING_PATHWAY	0.118651	-0.0246967	5.08607	5.74333e-07	1.56252e-06	4.78356
KEGG_OXIDATIVE_PHOSPHORYLATION	0.180782	-0.107731	5.06007	6.52782e-07	1.75021e-06	4.65991
KEGG_HEMATOPOIETIC_CELL_LINEAGE	-0.185489	0.00637068	-5.05225	6.78317e-07	1.7927e-06	4.62286
KEGG_SULFUR_METABOLISM	-0.152316	-0.0636772	-4.94827	1.12521e-06	2.93189e-06	4.13456
KEGG_ARRHYTHMOGENIC_RIGHT_VENTRICULAR_CARDIOMYOPATHY_ARVC	-0.140967	0.0163404	-4.8841	1.53115e-06	3.93422e-06	3.83769
KEGG_VASOPRESSIN_REGULATED_WATER_REABSORPTION	-0.110234	-0.0216679	-4.80268	2.25277e-06	5.70909e-06	3.46595
KEGG_RIBOFLAVIN_METABOLISM	0.118315	-0.0505439	4.50954	8.65744e-06	1.97732e-05	2.17367
KEGG_O_GLYCAN_BIOSYNTHESIS	-0.131518	-0.0296059	-4.47104	1.02788e-05	2.31901e-05	2.00934
KEGG_RENIN_ANGIOTENSIN_SYSTEM	-0.133334	0.00307265	-4.4647	1.05726e-05	2.35653e-05	1.98239
KEGG_VALINE_LEUCINE_AND_ISOLEUCINE_DEGRADATION	-0.141783	-0.0531887	-4.44502	1.15355e-05	2.54055e-05	1.899
KEGG_TYROSINE_METABOLISM	-0.100505	-0.0325105	-4.23942	2.81415e-05	6.12492e-05	1.04771
KEGG_LEUKOCYTE_TRANSENDOTHELIAL_MIGRATION	-0.115348	0.01277	-4.10896	4.86703e-05	0.000104698	0.526588
KEGG_METABOLISM_OF_XENOBIOTICS_BY_CYTOCHROME_P450	-0.114468	-0.0115924	-4.06496	5.8362e-05	0.000123679	0.354179
KEGG_INTESTINAL_IMMUNE_NETWORK_FOR_IGA_PRODUCTION	-0.182246	0.0110963	-4.06301	5.8831e-05	0.000123679	0.346583
KEGG_OTHER_GLYCAN_DEGRADATION	-0.137261	-0.0246368	-3.8322	0.000148473	0.000308625	-0.529376
KEGG_PENTOSE_AND_GLUCURONATE_INTERCONVERSIONS	0.10871	0.00561939	3.74492	0.000208275	0.000423416	-0.848285
KEGG_GALACTOSE_METABOLISM	0.104841	-0.0254576	3.65008	0.000298671	0.000575564	-1.18706
KEGG_FOLATE_BIOSYNTHESIS	0.125732	-0.0491166	3.53788	0.000453051	0.000838144	-1.57739
KEGG_TERPENOID_BACKBONE_BIOSYNTHESIS	0.13518	-0.0603508	3.49312	0.000533368	0.000976961	-1.72989
KEGG_LIMONENE_AND_PINENE_DEGRADATION	-0.12229	-0.0690594	-3.4379	0.000650839	0.00116898	-1.91556
KEGG_ECM_RECEPTOR_INTERACTION	-0.117911	0.0130312	-3.24203	0.0012912	0.00221177	-2.55162
KEGG_AUTOIMMUNE_THYROID_DISEASE	-0.130991	0.0360277	-3.1583	0.0017133	0.00286076	-2.81275
KEGG_LEISHMANIA_INFECTION	-0.113862	0.0138458	-2.97237	0.00314243	0.00514469	-3.36936
KEGG_ALLOGRAFT_REJECTION	-0.146446	0.025752	-2.87508	0.00426561	0.00674477	-3.64779
KEGG_VALINE_LEUCINE_AND_ISOLEUCINE_BIOSYNTHESIS	0.110902	-0.0358946	2.82825	0.00492716	0.00759604	-3.77864

## Sheet: Table S10
Table S10. Estimating the content of tumor microenvironment cells in LUAD patients by the method of Single-Sample Gene-Set Enrichment Analysis (ssGSEA)
Id	Activated.B.cellna	Activated.CD4.T.cellna	Activated.CD8.T.cellna	Activated.dendritic.cellna	CD56bright.natural.killer.cellna	CD56dim.natural.killer.cellna	Eosinophilna	Gamma.delta.T.cellna	Immature..B.cellna	Immature.dendritic.cellna	MDSCna	Macrophagena	Mast.cellna	Monocytena	Natural.killer.T.cellna	Natural.killer.cellna	Neutrophilna	Plasmacytoid.dendritic.cellna	Regulatory.T.cellna	T.follicular.helper.cellna	Type.1.T.helper.cellna	Type.17.T.helper.cellna	Type.2.T.helper.cellna
TCGA-75-6207-01A-11R-1755-07	0.46859	0.692681	0.723425	0.603619	0.730494	0.765469	0.425941	0.749501	0.531857	0.79217	0.833225	0.539795	0.502221	0.817757	0.492334	0.690874	0.395263	0.708525	0.73898	0.598148	0.617273	0.483459	0.642678
TCGA-78-7160-01A-11R-2039-07	0.606968	0.795842	0.853056	0.680366	0.752295	0.776822	0.477203	0.750293	0.644862	0.819937	0.902553	0.652494	0.682639	0.829861	0.629289	0.782923	0.550979	0.743984	0.791734	0.706063	0.68952	0.509149	0.75754
TCGA-49-6743-01A-11R-1858-07	0.545228	0.787989	0.738797	0.62431	0.747191	0.791544	0.340532	0.73557	0.590398	0.768575	0.859944	0.572525	0.564844	0.836827	0.565601	0.749159	0.497384	0.775635	0.781743	0.666046	0.667752	0.506769	0.65231
TCGA-05-4425-01A-01R-1755-07	0.489272	0.744417	0.804057	0.688255	0.790605	0.836316	0.406858	0.74908	0.572813	0.795948	0.914703	0.65868	0.661391	0.845951	0.523475	0.806655	0.350873	0.767329	0.82773	0.73927	0.693097	0.603555	0.718686
TCGA-78-7143-01A-11R-2039-07	0.524923	0.729463	0.701282	0.668536	0.743965	0.794303	0.418242	0.727016	0.565099	0.794834	0.848765	0.525868	0.576733	0.844196	0.454461	0.732979	0.318992	0.695182	0.747971	0.658764	0.636644	0.473777	0.699914
TCGA-55-8087-01A-11R-2241-07	0.336344	0.442421	0.647315	0.629051	0.714634	0.752582	0.356705	0.679352	0.429234	0.773139	0.803866	0.505855	0.547075	0.797318	0.41496	0.730078	0.278875	0.721525	0.683991	0.640762	0.575939	0.49484	0.549575
TCGA-55-6986-01A-11R-1949-07	0.590101	0.655153	0.758868	0.649936	0.73863	0.727763	0.455681	0.737163	0.580724	0.815911	0.844886	0.60753	0.615333	0.845012	0.492746	0.741364	0.316406	0.72346	0.736144	0.651033	0.643573	0.512669	0.679432
TCGA-35-4123-01A-01R-1107-07	0.588931	0.803801	0.894578	0.688289	0.781883	0.805053	0.426269	0.756202	0.662519	0.782496	0.94765	0.618509	0.706851	0.823491	0.653655	0.770925	0.380217	0.731052	0.85438	0.728041	0.707664	0.53033	0.680494
TCGA-55-7576-01A-11R-2066-07	0.57845	0.737686	0.769415	0.657762	0.758824	0.803189	0.406966	0.741425	0.631031	0.814799	0.865876	0.619673	0.656084	0.83004	0.547269	0.756858	0.446972	0.754998	0.789605	0.665006	0.665948	0.498596	0.688536
TCGA-64-5781-01A-01R-1628-07	0.568999	0.774045	0.883306	0.65096	0.793734	0.814457	0.395556	0.744454	0.603707	0.733065	0.875453	0.582677	0.588725	0.798038	0.628871	0.77609	0.437885	0.704373	0.713341	0.701541	0.687865	0.497547	0.72799
TCGA-L9-A50W-01A-12R-A39D-07	0.4657	0.591787	0.717959	0.639155	0.740148	0.78073	0.377729	0.68237	0.522366	0.793206	0.828947	0.494016	0.651624	0.827609	0.448066	0.732817	0.409783	0.740862	0.647536	0.6251	0.6227	0.547761	0.637936
TCGA-97-A4M5-01A-11R-A24X-07	0.578697	0.632487	0.778678	0.673315	0.775711	0.809626	0.461294	0.752123	0.615467	0.826689	0.874823	0.625865	0.709819	0.82202	0.55831	0.760269	0.460666	0.790606	0.759495	0.682211	0.655741	0.489419	0.66487
TCGA-35-4122-01A-01R-1107-07	0.629387	0.805296	0.872911	0.689572	0.765319	0.738617	0.425213	0.789451	0.687678	0.803279	0.959491	0.708228	0.685391	0.843187	0.659667	0.765735	0.475437	0.781692	0.856322	0.753981	0.715182	0.499811	0.684838
TCGA-55-A48Z-01A-12R-A24X-07	0.505527	0.690845	0.763648	0.602834	0.745733	0.780235	0.337824	0.737231	0.566344	0.799167	0.890828	0.535526	0.551602	0.794053	0.51698	0.737039	0.268217	0.779572	0.786242	0.651257	0.672032	0.482551	0.649381
TCGA-86-6851-01A-11R-1949-07	0.708608	0.745426	0.880958	0.640986	0.734372	0.806885	0.385616	0.705491	0.735188	0.794444	0.946192	0.587168	0.590188	0.814684	0.613023	0.766434	0.294066	0.770709	0.789531	0.682793	0.696299	0.554682	0.654872
TCGA-NJ-A4YF-01A-12R-A262-07	0.373294	0.609713	0.698456	0.618164	0.684322	0.831225	0.400783	0.663463	0.421277	0.800541	0.818288	0.420945	0.400687	0.805887	0.463828	0.653431	0.415553	0.736107	0.628209	0.558125	0.553146	0.482911	0.571967
TCGA-05-4389-01A-01R-1206-07	0.552117	0.755555	0.860722	0.699591	0.785944	0.823564	0.372316	0.774866	0.61919	0.861444	0.871847	0.632615	0.620772	0.85815	0.612479	0.754878	0.3863	0.776712	0.79299	0.673613	0.684244	0.579515	0.674617
TCGA-NJ-A4YQ-01A-11R-A262-07	0.755665	0.757823	0.895008	0.634039	0.720345	0.808185	0.399949	0.713112	0.756785	0.76628	0.935513	0.581617	0.538183	0.832838	0.568795	0.719615	0.513387	0.748605	0.808188	0.683935	0.684443	0.477474	0.616808
TCGA-55-6981-01A-11R-1949-07	0.596483	0.651906	0.692737	0.646684	0.738051	0.764615	0.433381	0.738599	0.592114	0.814549	0.819139	0.563117	0.661041	0.833486	0.507746	0.716315	0.368227	0.747243	0.745049	0.681209	0.624036	0.533481	0.677417
TCGA-97-7546-01A-11R-2039-07	0.641153	0.702589	0.778765	0.681831	0.743904	0.724911	0.525903	0.742516	0.649568	0.801388	0.879983	0.605214	0.645533	0.823758	0.566507	0.76161	0.436536	0.759493	0.783599	0.702119	0.672152	0.522778	0.68894
TCGA-MN-A4N1-01A-11R-A24X-07	0.363845	0.614513	0.612718	0.580387	0.717389	0.754902	0.315655	0.6914	0.377455	0.74489	0.750896	0.479003	0.513725	0.806055	0.466249	0.686939	0.310275	0.695148	0.653958	0.590157	0.581054	0.428457	0.616646
TCGA-62-A471-01A-12R-A24H-07	0.464566	0.686569	0.749549	0.563925	0.752698	0.789158	0.340413	0.656021	0.441635	0.754115	0.755248	0.470153	0.495565	0.782674	0.533135	0.664531	0.487085	0.740405	0.588525	0.534661	0.596664	0.508077	0.680341
TCGA-55-7570-01A-11R-2039-07	0.433351	0.689415	0.717039	0.546029	0.709482	0.739956	0.374608	0.675248	0.487367	0.726094	0.738766	0.418379	0.470663	0.777506	0.445361	0.680096	0.178016	0.726621	0.614326	0.548453	0.546767	0.470579	0.666755
TCGA-44-3917-01A-01R-A278-07	0.480896	0.772261	0.770512	0.527304	0.63814	0.757763	0.446355	0.692863	0.563675	0.728386	0.79796	0.479262	0.424356	0.757391	0.400466	0.695219	0.267513	0.64679	0.725147	0.570411	0.580884	0.452325	0.657569
TCGA-55-A4DF-01A-11R-A24H-07	0.564771	0.805008	0.816527	0.691452	0.786031	0.793693	0.352004	0.714313	0.665515	0.841642	0.902801	0.558928	0.481199	0.78855	0.533931	0.760797	0.250891	0.760044	0.767231	0.612183	0.638236	0.471061	0.665149
TCGA-50-5946-02A-11R-2090-07	0.507337	0.736886	0.763181	0.573151	0.746601	0.796291	0.360309	0.737817	0.560235	0.766018	0.809506	0.509143	0.581497	0.807141	0.540154	0.754679	0.292365	0.752885	0.747499	0.629941	0.6395	0.536596	0.702795
TCGA-78-8648-01A-11R-2403-07	0.696757	0.748722	0.86975	0.703303	0.758595	0.760223	0.545951	0.767537	0.721833	0.836747	0.967482	0.719796	0.756006	0.855944	0.671609	0.784259	0.383113	0.792197	0.863934	0.735965	0.726474	0.483526	0.708105
TCGA-67-3770-01A-01R-0946-07	0.412272	0.671397	0.808825	0.677305	0.740236	0.733052	0.435463	0.76102	0.500529	0.798856	0.876779	0.597936	0.626797	0.830438	0.520775	0.7335	0.353549	0.778381	0.720214	0.669226	0.624464	0.459955	0.659411
TCGA-50-5936-01A-11R-1628-07	0.561085	0.710774	0.728519	0.666064	0.767942	0.732805	0.392984	0.773184	0.569872	0.797298	0.875084	0.625919	0.615792	0.838687	0.539174	0.744689	0.487837	0.751814	0.799338	0.679807	0.656722	0.515005	0.700243
TCGA-67-6216-01A-11R-1755-07	0.627405	0.682902	0.777028	0.698636	0.756556	0.770049	0.461543	0.71606	0.64693	0.819732	0.894729	0.631586	0.634349	0.858026	0.503243	0.753841	0.410921	0.753503	0.779873	0.646981	0.641796	0.490108	0.679712
TCGA-69-7974-01A-11R-2187-07	0.579159	0.784603	0.79718	0.700949	0.730981	0.808947	0.492424	0.75891	0.63789	0.856332	0.93066	0.663828	0.705684	0.837426	0.628107	0.783784	0.456818	0.782103	0.846325	0.708566	0.670006	0.524833	0.699368
TCGA-86-8281-01A-11R-2287-07	0.585197	0.591295	0.742577	0.631149	0.699037	0.79822	0.387479	0.710449	0.577392	0.754519	0.798189	0.525575	0.5663	0.808701	0.489025	0.706875	0.344694	0.720383	0.683238	0.641483	0.6382	0.494072	0.633297
TCGA-44-2662-01B-02R-A277-07	0.142921	0.677388	0.418767	0.559729	0.55073	0.562607	0.435699	0.596655	0.439879	0.749691	0.764959	0.376992	0.409923	0.631157	0.341389	0.587282	0.287055	0.629341	0.76033	0.507737	0.479013	0.363571	0.625136
TCGA-93-A4JQ-01A-11R-A24X-07	0.74362	0.766546	0.845113	0.635204	0.738033	0.782269	0.434756	0.706986	0.741918	0.788229	0.902312	0.556981	0.550174	0.834394	0.553355	0.75374	0.285635	0.771685	0.789751	0.6869	0.702078	0.530685	0.670724
TCGA-55-8207-01A-11R-2241-07	0.4688	0.605714	0.753835	0.672354	0.745281	0.756237	0.473588	0.726909	0.557375	0.857458	0.909213	0.654399	0.726507	0.820636	0.510537	0.766766	0.451484	0.781249	0.82284	0.67285	0.657979	0.483146	0.613348
TCGA-97-8176-01A-11R-2403-07	0.47606	0.705363	0.713384	0.653964	0.731631	0.762858	0.369989	0.748346	0.493309	0.813647	0.853374	0.598416	0.524747	0.82166	0.496583	0.709525	0.557898	0.774552	0.739808	0.629435	0.633634	0.502844	0.671599
TCGA-86-8280-01A-11R-2287-07	0.644402	0.69535	0.826233	0.695502	0.7517	0.755278	0.472149	0.747619	0.661637	0.832235	0.897147	0.614853	0.6578	0.847191	0.542892	0.761534	0.382261	0.780184	0.811537	0.716797	0.683696	0.541927	0.6621
TCGA-MP-A4T8-01A-11R-A24X-07	0.35963	0.670067	0.679774	0.620309	0.755678	0.860389	0.340805	0.686894	0.393213	0.771069	0.774932	0.472366	0.481224	0.806071	0.489934	0.701963	0.444476	0.723561	0.663224	0.584496	0.600445	0.452548	0.652163
TCGA-55-A492-01A-11R-A24H-07	0.466405	0.51867	0.724301	0.633972	0.686026	0.757711	0.377732	0.691237	0.443589	0.753437	0.763991	0.528239	0.5097	0.809855	0.518531	0.692463	0.427469	0.660064	0.625359	0.563972	0.58772	0.451264	0.582881
TCGA-J2-8192-01A-11R-2241-07	0.544358	0.678208	0.756403	0.691528	0.752269	0.757268	0.427176	0.757003	0.616121	0.844153	0.920408	0.625841	0.656378	0.838475	0.510041	0.782859	0.418231	0.790866	0.85509	0.690657	0.689938	0.522759	0.679175
TCGA-50-8460-01A-11R-2326-07	0.664142	0.667403	0.806062	0.684454	0.78199	0.751555	0.442306	0.734341	0.638631	0.84649	0.895405	0.636685	0.717699	0.861543	0.508585	0.759062	0.401919	0.767396	0.764096	0.663463	0.658043	0.502811	0.630439
TCGA-80-5607-01A-31R-1949-07	0.550716	0.778351	0.815128	0.666855	0.761682	0.776653	0.519719	0.728806	0.569721	0.80295	0.873603	0.583659	0.686768	0.822118	0.532619	0.750866	0.412417	0.717104	0.760192	0.665641	0.636658	0.491715	0.709077
TCGA-NJ-A55A-01A-11R-A262-07	0.696932	0.648991	0.816474	0.661841	0.751832	0.731839	0.504506	0.696342	0.677302	0.828222	0.858421	0.532018	0.677868	0.82678	0.50695	0.777498	0.375285	0.763316	0.737222	0.669754	0.640692	0.484141	0.668868
TCGA-55-8097-01A-11R-2241-07	0.566861	0.551001	0.740451	0.596215	0.709873	0.737252	0.446009	0.68114	0.550241	0.788762	0.839067	0.550489	0.68224	0.807434	0.469967	0.733172	0.271476	0.715614	0.675921	0.645402	0.606536	0.490088	0.582065
TCGA-44-6147-01A-11R-1755-07	0.688986	0.666899	0.765098	0.638252	0.765268	0.7557	0.492248	0.702206	0.678176	0.810261	0.865016	0.581652	0.653223	0.831137	0.506374	0.741081	0.456118	0.782235	0.728017	0.665863	0.662916	0.472237	0.631358
TCGA-55-A490-01A-11R-A466-07	0.491906	0.647281	0.736416	0.62861	0.722078	0.844978	0.395648	0.726674	0.553899	0.749756	0.897328	0.597649	0.583504	0.843148	0.542361	0.748685	0.344251	0.750643	0.778783	0.633454	0.601258	0.46123	0.628705
TCGA-86-7711-01A-11R-2066-07	0.528388	0.762693	0.724946	0.713037	0.748466	0.7443	0.45133	0.75986	0.6174	0.835248	0.876544	0.621367	0.614122	0.82214	0.553589	0.751294	0.621665	0.810376	0.793753	0.636887	0.663341	0.515275	0.677016
TCGA-MP-A4TK-01A-11R-A24X-07	0.655423	0.73529	0.776661	0.677939	0.763953	0.806846	0.441776	0.761921	0.650856	0.776482	0.914479	0.649999	0.605102	0.825545	0.562734	0.744456	0.36812	0.738468	0.831714	0.691815	0.690058	0.509565	0.672437
TCGA-50-5066-01A-01R-1628-07	0.682055	0.813198	0.887502	0.689739	0.752486	0.771428	0.489046	0.771622	0.727176	0.810602	0.92965	0.677649	0.692149	0.828979	0.634247	0.765891	0.432546	0.746362	0.841908	0.706677	0.682664	0.459718	0.7015
TCGA-44-2666-01A-01R-A278-07	0.347232	0.62711	0.613293	0.525434	0.683276	0.67318	0.394521	0.653613	0.472774	0.79108	0.724978	0.466223	0.627523	0.735651	0.385565	0.648647	0.217787	0.666676	0.658947	0.542166	0.555448	0.384925	0.655913
TCGA-50-5942-01A-21R-1755-07	0.576584	0.562882	0.728292	0.634426	0.745036	0.719603	0.503669	0.661399	0.595312	0.817976	0.804017	0.543812	0.636543	0.816155	0.498941	0.749349	0.321136	0.728876	0.682662	0.66131	0.638062	0.544662	0.657923
TCGA-69-8453-01A-12R-2326-07	0.616709	0.749555	0.837324	0.743301	0.753253	0.803186	0.530375	0.778846	0.674369	0.872313	0.956318	0.676737	0.736908	0.8529	0.59007	0.787214	0.534088	0.80687	0.838202	0.703672	0.704378	0.585366	0.708824
TCGA-44-8119-01A-11R-2241-07	0.526693	0.740659	0.780477	0.652213	0.742733	0.866379	0.443249	0.732052	0.566104	0.816592	0.886374	0.564326	0.602476	0.825693	0.552805	0.760514	0.413396	0.785382	0.79719	0.648078	0.642177	0.570183	0.696961
TCGA-MP-A4TE-01A-22R-A466-07	0.464068	0.611423	0.662258	0.55418	0.685268	0.871289	0.289482	0.663326	0.4183	0.766644	0.736847	0.465982	0.453329	0.797079	0.452425	0.696583	0.532941	0.754828	0.587177	0.52608	0.550647	0.566061	0.644941
TCGA-55-6543-01A-11R-1755-07	0.471077	0.62134	0.728889	0.690091	0.737634	0.775514	0.456249	0.77512	0.560338	0.815774	0.90169	0.626292	0.670286	0.822987	0.53995	0.766281	0.530367	0.771446	0.802304	0.642925	0.650912	0.510031	0.65053
TCGA-49-AAR3-01A-11R-A41B-07	0.65841	0.788579	0.884598	0.64282	0.766674	0.807512	0.393598	0.744268	0.696619	0.78304	0.94936	0.615106	0.553392	0.826531	0.622095	0.786392	0.391881	0.756568	0.844859	0.684736	0.703412	0.474197	0.658304
TCGA-38-4632-01A-01R-1755-07	0.563598	0.796298	0.821602	0.722431	0.78483	0.800942	0.448868	0.76407	0.635646	0.829814	0.910799	0.65661	0.658543	0.838092	0.597793	0.734563	0.482647	0.759733	0.81821	0.692626	0.673976	0.551444	0.696254
TCGA-62-A46S-01A-11R-A24H-07	0.508368	0.61161	0.768415	0.640105	0.743441	0.812223	0.499331	0.688474	0.52002	0.786928	0.854688	0.525296	0.588044	0.801847	0.551371	0.701508	0.356883	0.70231	0.707932	0.639608	0.624535	0.539473	0.687578
TCGA-99-8033-01A-11R-2241-07	0.471638	0.770063	0.822999	0.654312	0.724964	0.787017	0.353831	0.680216	0.53769	0.767558	0.864767	0.516091	0.531015	0.7923	0.535884	0.742185	0.486244	0.731155	0.722513	0.65249	0.653149	0.505773	0.691252
TCGA-55-6980-01A-11R-1949-07	0.477125	0.633488	0.812218	0.686049	0.769383	0.789979	0.502342	0.71317	0.559634	0.823258	0.913776	0.634234	0.662471	0.884056	0.537897	0.805821	0.423607	0.785909	0.804595	0.706911	0.684492	0.516957	0.657421
TCGA-05-4244-01A-01R-1107-07	0.377832	0.703757	0.748837	0.684379	0.744377	0.737878	0.421017	0.743176	0.492516	0.830787	0.886868	0.563339	0.63961	0.841382	0.486112	0.711952	0.395735	0.745324	0.792647	0.642251	0.62008	0.472696	0.644737
TCGA-91-8497-01A-11R-2403-07	0.757562	0.630991	0.794897	0.685216	0.756654	0.827142	0.488258	0.738854	0.718024	0.855605	0.9089	0.64253	0.636453	0.848811	0.561572	0.777612	0.399308	0.759025	0.814132	0.710517	0.682226	0.556107	0.647702
TCGA-64-1680-01A-02R-0946-07	0.405142	0.635233	0.715009	0.639783	0.736417	0.711628	0.427035	0.69495	0.46241	0.843901	0.781581	0.538103	0.590968	0.794398	0.488439	0.719202	0.379272	0.71823	0.622092	0.601665	0.597953	0.512471	0.652587
TCGA-86-7953-01A-11R-2187-07	0.574997	0.801149	0.778655	0.712199	0.770014	0.785878	0.472286	0.73676	0.61824	0.855152	0.914139	0.599675	0.576687	0.829933	0.505129	0.765735	0.416867	0.777272	0.785208	0.682565	0.662989	0.606123	0.696509
TCGA-55-8616-01A-11R-2403-07	0.631467	0.650383	0.730344	0.61145	0.734162	0.791917	0.459996	0.678859	0.601227	0.81598	0.799952	0.51064	0.591013	0.820239	0.461824	0.728925	0.402416	0.735794	0.657121	0.63641	0.614725	0.522433	0.622956
TCGA-86-8055-01A-11R-2241-07	0.542573	0.707217	0.723233	0.652459	0.756807	0.783737	0.368689	0.755011	0.609821	0.812929	0.881571	0.611383	0.606775	0.824964	0.535946	0.763959	0.357918	0.753853	0.833893	0.675448	0.690784	0.517207	0.689247
TCGA-73-4668-01A-01R-1206-07	0.462239	0.682937	0.693371	0.646484	0.754157	0.824808	0.399924	0.723991	0.523639	0.826309	0.822429	0.515578	0.644944	0.820521	0.533696	0.73841	0.327256	0.724611	0.738688	0.635347	0.616124	0.454552	0.650917
TCGA-95-7567-01A-11R-2066-07	0.58228	0.743842	0.7971	0.631652	0.746361	0.806237	0.375147	0.726164	0.610858	0.749947	0.852863	0.524342	0.547832	0.8187	0.553963	0.746719	0.388281	0.706963	0.751583	0.625091	0.651544	0.54094	0.664942
TCGA-99-AA5R-01A-11R-A39D-07	0.751437	0.711114	0.873325	0.673667	0.761631	0.751019	0.53984	0.74312	0.740894	0.813035	0.931555	0.635973	0.67513	0.8538	0.6192	0.77357	0.376911	0.797289	0.795862	0.711666	0.705602	0.523157	0.669054
TCGA-97-8174-01A-11R-2287-07	0.604712	0.622583	0.759478	0.630303	0.712509	0.754656	0.453704	0.729668	0.593183	0.787203	0.867838	0.597523	0.65901	0.818725	0.54255	0.737772	0.33247	0.739439	0.753631	0.666167	0.655256	0.511633	0.657095
TCGA-55-8089-01A-11R-2241-07	0.663165	0.820018	0.908742	0.639948	0.768924	0.758557	0.426272	0.759107	0.717715	0.789247	0.950763	0.656289	0.601492	0.849477	0.689094	0.770528	0.414886	0.765836	0.854701	0.721928	0.694669	0.492271	0.69398
TCGA-69-A59K-01A-11R-A262-07	0.557041	0.68635	0.74642	0.612922	0.687899	0.831696	0.398948	0.692483	0.627422	0.797649	0.847719	0.518778	0.494318	0.83693	0.492868	0.695806	0.293768	0.720059	0.759106	0.621721	0.600792	0.414287	0.564254
TCGA-55-6978-01A-11R-1949-07	0.543388	0.832106	0.891432	0.663999	0.773537	0.779555	0.464904	0.767392	0.641282	0.800468	0.926923	0.625562	0.591405	0.827552	0.655547	0.792668	0.430441	0.763893	0.88548	0.731802	0.705475	0.517874	0.7167
TCGA-78-7153-01A-11R-2039-07	0.553865	0.645939	0.762513	0.583107	0.746605	0.806198	0.378381	0.660115	0.514043	0.760488	0.761887	0.507018	0.502412	0.796305	0.484362	0.714127	0.218876	0.662826	0.606384	0.617905	0.611412	0.528281	0.670861
TCGA-05-5715-01A-01R-1628-07	0.512655	0.642982	0.719146	0.655879	0.776856	0.760788	0.396579	0.745659	0.570305	0.86021	0.871331	0.602915	0.6811	0.867376	0.54197	0.74509	0.431615	0.729966	0.782087	0.666769	0.666286	0.57192	0.654304
TCGA-69-8254-01A-11R-2287-07	0.630624	0.685004	0.778088	0.668525	0.738102	0.778754	0.494575	0.727177	0.629079	0.84677	0.851354	0.590066	0.643926	0.846694	0.549769	0.751937	0.425949	0.731237	0.759585	0.655368	0.664736	0.570026	0.68654
TCGA-J2-A4AE-01A-21R-A24H-07	0.615265	0.733199	0.770213	0.629012	0.709874	0.730311	0.522662	0.705973	0.614063	0.824809	0.858993	0.53186	0.640749	0.811321	0.467967	0.704866	0.332556	0.748793	0.728756	0.627494	0.632855	0.498674	0.681694
TCGA-78-7150-01A-21R-2039-07	0.380331	0.693835	0.702677	0.59122	0.727427	0.80235	0.300037	0.70881	0.406977	0.732012	0.760925	0.484075	0.470235	0.772636	0.515239	0.693195	0.387288	0.742921	0.662031	0.607497	0.625995	0.466048	0.709085
TCGA-93-A4JN-01A-11R-A24X-07	0.666818	0.707585	0.711279	0.61877	0.730194	0.745265	0.446919	0.708811	0.649139	0.792087	0.839227	0.551691	0.641136	0.824403	0.511842	0.754904	0.341803	0.723458	0.716675	0.643152	0.638578	0.481813	0.697294
TCGA-J2-8194-01A-11R-2241-07	0.476816	0.631729	0.700327	0.672221	0.717198	0.797083	0.457578	0.722717	0.500388	0.82165	0.842722	0.573859	0.603593	0.797041	0.490956	0.730334	0.549456	0.775368	0.74567	0.639537	0.637713	0.548665	0.644474
TCGA-55-6712-01A-11R-1858-07	0.650218	0.788166	0.844618	0.661282	0.763023	0.766954	0.444837	0.763144	0.699527	0.802217	0.912274	0.602539	0.659006	0.845168	0.587164	0.770495	0.402443	0.759721	0.818626	0.67986	0.678274	0.489372	0.675011
TCGA-44-2668-01A-01R-A278-07	0.465744	0.840941	0.778604	0.663867	0.746191	0.736329	0.366202	0.752737	0.607284	0.777499	0.905276	0.596097	0.509126	0.78809	0.553072	0.766432	0.579884	0.791509	0.838624	0.660473	0.665598	0.558715	0.685649
TCGA-55-7815-01A-11R-2170-07	0.576818	0.811091	0.78957	0.715535	0.771953	0.762104	0.445452	0.764348	0.653728	0.815726	0.871595	0.626883	0.531961	0.802328	0.541343	0.759462	0.435184	0.696309	0.814907	0.654745	0.654459	0.549942	0.754797
TCGA-50-5049-01A-01R-1628-07	0.752225	0.798501	0.899336	0.706961	0.776669	0.772295	0.498361	0.786556	0.77764	0.830276	0.962323	0.674789	0.717961	0.866886	0.616467	0.800055	0.405034	0.750503	0.883142	0.73102	0.739645	0.49197	0.692724
TCGA-49-4510-01A-01R-1206-07	0.476094	0.509766	0.730052	0.639064	0.717528	0.824464	0.466964	0.704629	0.483434	0.765361	0.808795	0.514828	0.560084	0.824553	0.514655	0.699349	0.399851	0.717939	0.657766	0.631056	0.597794	0.497385	0.604917
TCGA-73-4666-01A-01R-1206-07	0.509501	0.817315	0.86522	0.668409	0.759591	0.822037	0.441859	0.752285	0.637564	0.803525	0.937566	0.636953	0.624578	0.833851	0.640706	0.737098	0.410533	0.725438	0.820546	0.696108	0.678956	0.498348	0.687782
TCGA-MP-A5C7-01A-11R-A262-07	0.327373	0.583282	0.646825	0.526073	0.665543	0.77721	0.352013	0.629195	0.3456	0.705628	0.679446	0.370561	0.470779	0.774687	0.468273	0.648751	0.200473	0.705298	0.568314	0.564577	0.52502	0.444884	0.594641
TCGA-55-7994-01A-11R-2187-07	0.605971	0.781721	0.849024	0.658922	0.718537	0.769722	0.412246	0.72353	0.676824	0.78896	0.916532	0.578489	0.527222	0.828506	0.556813	0.754395	0.351219	0.744197	0.807235	0.682846	0.647728	0.526037	0.646224
TCGA-95-7039-01A-11R-1949-07	0.47972	0.686525	0.746531	0.603851	0.744257	0.848483	0.446772	0.715425	0.519781	0.777022	0.792995	0.517521	0.611292	0.817955	0.548128	0.764754	0.276019	0.696802	0.687962	0.657592	0.6393	0.498725	0.672772
TCGA-78-7156-01A-11R-2039-07	0.324899	0.550825	0.727819	0.580276	0.668961	0.703935	0.42314	0.675609	0.414575	0.724499	0.728188	0.418448	0.492161	0.775767	0.495939	0.647462	0.281481	0.689669	0.573958	0.547244	0.571255	0.445115	0.575899
TCGA-55-8299-01A-11R-2287-07	0.657328	0.78352	0.893144	0.694752	0.796376	0.764266	0.465518	0.765351	0.667561	0.814693	0.943806	0.687592	0.709303	0.840855	0.645817	0.779048	0.535637	0.828222	0.829595	0.721623	0.696061	0.558181	0.728756
TCGA-44-7661-01A-11R-2066-07	0.566534	0.806688	0.789947	0.718741	0.759744	0.758082	0.443426	0.787632	0.615083	0.825469	0.938473	0.660404	0.680163	0.836247	0.600459	0.793887	0.421586	0.755482	0.872592	0.728421	0.706777	0.520744	0.72241
TCGA-44-4112-01A-01R-1107-07	0.484914	0.714817	0.766645	0.680928	0.758045	0.785926	0.446997	0.767249	0.600579	0.790006	0.843204	0.634344	0.662691	0.823927	0.566141	0.754153	0.361569	0.760183	0.782188	0.672352	0.652693	0.478414	0.655098
TCGA-69-7765-01A-11R-2170-07	0.600162	0.70511	0.779896	0.662573	0.759846	0.798343	0.438711	0.727858	0.657059	0.82826	0.873637	0.607545	0.643595	0.819021	0.568294	0.756037	0.385083	0.753222	0.783347	0.668019	0.66935	0.466398	0.695021
TCGA-55-7281-01A-11R-2039-07	0.524274	0.693932	0.790958	0.697939	0.742788	0.785324	0.476624	0.747023	0.599968	0.852928	0.916798	0.645429	0.637554	0.844375	0.557801	0.797239	0.380443	0.742305	0.815311	0.690926	0.665099	0.556545	0.679247
TCGA-50-6597-01A-11R-1858-07	0.63797	0.655819	0.837851	0.635975	0.743705	0.763074	0.378176	0.682728	0.606903	0.783847	0.847868	0.533797	0.494601	0.854174	0.484114	0.692787	0.383793	0.724067	0.640443	0.674516	0.635253	0.493136	0.669768
TCGA-73-4677-01A-01R-1206-07	0.571175	0.656792	0.756579	0.645939	0.721273	0.77726	0.482873	0.762176	0.584147	0.805688	0.836645	0.591694	0.667428	0.817657	0.548678	0.714724	0.46841	0.720475	0.72738	0.627617	0.63455	0.511569	0.656977
TCGA-05-4434-01A-01R-1206-07	0.657062	0.760357	0.823517	0.691722	0.775202	0.782199	0.407406	0.759111	0.661606	0.826176	0.940566	0.691554	0.651926	0.857424	0.580149	0.754785	0.476695	0.786234	0.88316	0.753378	0.695641	0.546417	0.673054
TCGA-MP-A4SW-01A-21R-A24X-07	0.638308	0.695153	0.764203	0.633639	0.743604	0.780727	0.436915	0.713802	0.636375	0.820827	0.888708	0.591238	0.61255	0.835044	0.517427	0.729247	0.394622	0.746415	0.769858	0.657366	0.647577	0.555538	0.6264
TCGA-55-6972-01A-11R-1949-07	0.275768	0.517137	0.652349	0.493466	0.645112	0.679577	0.389855	0.651212	0.284409	0.695493	0.579628	0.339842	0.36185	0.742364	0.381262	0.579697	0.246595	0.617586	0.440481	0.460739	0.487669	0.348966	0.500628
TCGA-78-7633-01A-11R-2066-07	0.365399	0.59664	0.67826	0.60194	0.688161	0.748914	0.461585	0.739492	0.436066	0.775348	0.759111	0.533706	0.627492	0.812477	0.521083	0.688367	0.387787	0.72304	0.644696	0.640439	0.615949	0.465238	0.66834
TCGA-44-2659-01A-01R-0946-07	0.581753	0.646312	0.817295	0.646461	0.769865	0.743406	0.378713	0.70952	0.641244	0.797844	0.87998	0.558579	0.633042	0.807013	0.529548	0.743008	0.304702	0.724006	0.752779	0.672905	0.665639	0.497704	0.64542
TCGA-55-6983-01A-11R-1949-07	0.740831	0.725678	0.851929	0.679108	0.765675	0.839672	0.460746	0.71963	0.709277	0.81762	0.868674	0.612442	0.614265	0.847686	0.525178	0.778422	0.37537	0.748265	0.751516	0.693425	0.684772	0.53609	0.691624
TCGA-97-A4M0-01A-11R-A24X-07	0.548513	0.679325	0.831501	0.687416	0.739686	0.781319	0.43953	0.701143	0.610619	0.80388	0.912793	0.579133	0.646431	0.828707	0.500368	0.74936	0.370372	0.73232	0.737026	0.656753	0.658953	0.488806	0.607176
TCGA-50-5068-01A-01R-1628-07	0.704883	0.773929	0.88988	0.712509	0.760051	0.758581	0.511628	0.732401	0.717766	0.812712	0.900216	0.604977	0.708237	0.859101	0.549062	0.774996	0.448013	0.719286	0.800367	0.711892	0.681428	0.531281	0.714156
TCGA-86-A4P8-01A-11R-A24X-07	0.555982	0.671425	0.8474	0.68362	0.745574	0.725964	0.576151	0.763664	0.640502	0.848184	0.961226	0.632154	0.704983	0.859421	0.603902	0.790093	0.372625	0.776781	0.782738	0.725301	0.684522	0.499945	0.646527
TCGA-86-A4D0-01A-11R-A24H-07	0.426042	0.753924	0.753366	0.579954	0.71586	0.817567	0.366166	0.696699	0.439298	0.734593	0.753903	0.439642	0.473656	0.78025	0.472498	0.723042	0.317232	0.743879	0.644002	0.595616	0.582478	0.55485	0.671395
TCGA-55-8085-01A-11R-2241-07	0.633021	0.783787	0.837041	0.651542	0.731204	0.772431	0.374842	0.718915	0.652995	0.770205	0.903149	0.5752	0.519339	0.821683	0.542862	0.754713	0.389195	0.753111	0.762454	0.624114	0.657265	0.492154	0.671347
TCGA-50-5935-01A-11R-1755-07	0.508039	0.670195	0.789968	0.652776	0.753162	0.762616	0.420727	0.725712	0.572501	0.826002	0.888804	0.582137	0.541587	0.847307	0.560987	0.740582	0.362475	0.698548	0.759356	0.659477	0.668406	0.547853	0.670298
TCGA-53-7813-01A-11R-2170-07	0.585944	0.730476	0.801069	0.633137	0.728329	0.821688	0.405909	0.629616	0.618459	0.76942	0.77924	0.414566	0.460492	0.753368	0.418314	0.72129	0.268862	0.700161	0.600662	0.523421	0.577694	0.537329	0.737154
TCGA-73-4662-01A-01R-1206-07	0.665521	0.723536	0.80203	0.676791	0.747403	0.817845	0.463574	0.741982	0.680287	0.801211	0.887798	0.601327	0.675481	0.845452	0.503334	0.736913	0.386326	0.769982	0.797687	0.678123	0.656288	0.512323	0.652641
TCGA-62-8399-01A-21R-2326-07	0.475709	0.700195	0.704227	0.639989	0.711314	0.755983	0.515088	0.724453	0.538229	0.849981	0.846788	0.556976	0.673335	0.795601	0.496026	0.716039	0.493005	0.768073	0.714827	0.650066	0.623818	0.454255	0.634505
TCGA-44-7671-01A-11R-2066-07	0.473591	0.62561	0.679185	0.641676	0.726486	0.759886	0.487872	0.74868	0.480598	0.803396	0.778599	0.565252	0.572951	0.836401	0.493136	0.721906	0.443629	0.745384	0.695952	0.657918	0.617096	0.477165	0.672749
TCGA-97-7552-01A-11R-2039-07	0.78727	0.743409	0.889018	0.668302	0.762068	0.77274	0.481605	0.72791	0.783977	0.834067	0.900253	0.627527	0.643777	0.842739	0.590483	0.797716	0.504497	0.789621	0.808746	0.721706	0.705587	0.585536	0.706418
TCGA-44-6145-01A-11R-1755-07	0.728153	0.777539	0.871146	0.707233	0.767675	0.759691	0.427294	0.767957	0.716633	0.807466	0.921668	0.642726	0.620951	0.835148	0.613308	0.790456	0.588087	0.782964	0.799247	0.681495	0.700119	0.499688	0.726472
TCGA-44-7670-01A-11R-2066-07	0.488687	0.740309	0.686504	0.62041	0.745	0.803663	0.402062	0.71554	0.525676	0.812526	0.752248	0.532073	0.532888	0.802035	0.497873	0.702195	0.341002	0.784151	0.722254	0.623371	0.615999	0.537154	0.672605
TCGA-49-AARO-01A-12R-A41B-07	0.636239	0.709926	0.822231	0.694545	0.753689	0.790807	0.451322	0.729874	0.62711	0.835498	0.946646	0.634522	0.510626	0.861834	0.588309	0.764605	0.428844	0.757135	0.843016	0.688982	0.659298	0.502468	0.617379
TCGA-44-2657-01A-01R-1107-07	0.835384	0.73665	0.885703	0.672794	0.783198	0.762612	0.482578	0.763752	0.807777	0.826321	0.93326	0.64642	0.706589	0.864177	0.625556	0.770744	0.347558	0.767589	0.80516	0.750843	0.695345	0.474975	0.655327
TCGA-55-8204-01A-11R-2241-07	0.584272	0.715661	0.741797	0.637591	0.800598	0.736625	0.437115	0.693079	0.590681	0.82839	0.825849	0.577789	0.581496	0.800399	0.537341	0.732249	0.520397	0.785919	0.725446	0.643971	0.634136	0.507339	0.689421
TCGA-64-1676-01A-01R-0946-07	0.515154	0.702109	0.823078	0.661613	0.774825	0.75176	0.425194	0.754211	0.585069	0.800233	0.920008	0.633284	0.633864	0.845316	0.571584	0.74219	0.370752	0.739188	0.808533	0.693786	0.640761	0.455328	0.666913
TCGA-91-8496-01A-11R-2403-07	0.4483	0.640253	0.803217	0.744287	0.760002	0.745351	0.478383	0.773986	0.591226	0.844185	0.91666	0.654599	0.745622	0.875201	0.544651	0.762293	0.471236	0.772397	0.781746	0.719712	0.66944	0.500151	0.634103
TCGA-35-3615-01A-01R-0946-07	0.528549	0.575366	0.736699	0.623037	0.706859	0.744479	0.377502	0.721096	0.553904	0.766181	0.803512	0.553235	0.596829	0.77896	0.444191	0.712695	0.355553	0.706954	0.69465	0.625147	0.614236	0.466136	0.628372
TCGA-55-8096-01A-11R-2241-07	0.554053	0.603426	0.71938	0.652227	0.773237	0.778714	0.330105	0.752646	0.613621	0.807327	0.92628	0.604428	0.576632	0.848778	0.526044	0.748829	0.308598	0.747052	0.835093	0.66942	0.649799	0.517415	0.628031
TCGA-67-6215-01A-11R-1755-07	0.411723	0.650132	0.678691	0.694041	0.753372	0.770657	0.367824	0.717275	0.456465	0.800237	0.85907	0.553564	0.55732	0.811559	0.484353	0.732712	0.334556	0.750777	0.713289	0.656115	0.62081	0.512708	0.62085
TCGA-53-A4EZ-01A-12R-A24X-07	0.50097	0.699744	0.719252	0.589115	0.722034	0.827273	0.343525	0.686622	0.500381	0.84313	0.75449	0.470117	0.366088	0.811624	0.437828	0.663997	0.256639	0.727492	0.652268	0.559812	0.556002	0.48459	0.629178
TCGA-MP-A4SY-01A-21R-A24X-07	0.348376	0.627742	0.666786	0.626178	0.747934	0.799199	0.337793	0.720146	0.484713	0.8131	0.851334	0.56817	0.525877	0.80519	0.507729	0.746256	0.381014	0.708302	0.805798	0.645308	0.634122	0.437814	0.597754
TCGA-73-4676-01A-01R-1755-07	0.427917	0.762048	0.720723	0.667833	0.725105	0.758155	0.452291	0.764174	0.523968	0.848283	0.827678	0.599863	0.677408	0.861196	0.528936	0.742302	0.46088	0.740978	0.752063	0.645104	0.633221	0.413777	0.691888
TCGA-86-8075-01A-11R-2241-07	0.55267	0.717281	0.697257	0.665758	0.75036	0.731679	0.46275	0.754815	0.618523	0.824361	0.877817	0.597521	0.636794	0.829312	0.544455	0.764803	0.362359	0.805612	0.840289	0.676109	0.676487	0.516645	0.712595
TCGA-78-8660-01A-11R-2403-07	0.590795	0.772948	0.866784	0.664947	0.739219	0.734224	0.432245	0.743	0.635028	0.81022	0.906566	0.631368	0.604642	0.825169	0.602584	0.761047	0.360571	0.737048	0.806903	0.680704	0.674252	0.532519	0.68749
TCGA-91-6840-01A-11R-1949-07	0.548513	0.717981	0.794301	0.592723	0.730427	0.770084	0.417466	0.684574	0.579422	0.778623	0.827184	0.508571	0.529689	0.810518	0.537584	0.718548	0.31724	0.712187	0.731659	0.610663	0.632139	0.471228	0.637202
TCGA-44-2665-01A-01R-0946-07	0.388908	0.671171	0.709865	0.67649	0.800365	0.759442	0.35927	0.760919	0.492375	0.808018	0.91575	0.62912	0.575669	0.807268	0.547735	0.741124	0.406882	0.777874	0.828258	0.700477	0.648108	0.505071	0.663323
TCGA-44-6775-01A-11R-1858-07	0.545781	0.71359	0.73466	0.700355	0.758105	0.759768	0.403528	0.769034	0.614409	0.850458	0.918208	0.673522	0.636545	0.837371	0.54921	0.793164	0.443578	0.810585	0.875006	0.699908	0.683087	0.506169	0.713169
TCGA-75-7025-01A-12R-1949-07	0.618054	0.56794	0.770097	0.663808	0.764796	0.733664	0.511858	0.700943	0.621665	0.832322	0.874819	0.597076	0.630378	0.860443	0.516413	0.75295	0.346951	0.756711	0.761082	0.671901	0.645591	0.501755	0.606913
TCGA-44-A479-01A-31R-A24H-07	0.700729	0.789448	0.885013	0.642537	0.752104	0.815041	0.439735	0.715586	0.713722	0.79547	0.927154	0.581412	0.517128	0.828921	0.562068	0.786206	0.307253	0.757558	0.782649	0.672307	0.666966	0.586018	0.642327
TCGA-44-3917-01B-02R-A277-07	0.305455	0.690926	0.551345	0.458644	0.536361	0.617874	0.390576	0.544578	0.459355	0.619958	0.627906	0.238162	0.285746	0.64627	0.270439	0.570981	0	0.51996	0.619637	0.468419	0.451222	0.337306	0.612937
TCGA-78-7146-01A-11R-2039-07	0.346002	0.749797	0.706287	0.623814	0.763716	0.732899	0.294687	0.725412	0.452504	0.746896	0.830677	0.534944	0.549921	0.786978	0.518008	0.699304	0.333949	0.735991	0.750059	0.598216	0.617396	0.452581	0.579133
TCGA-91-8499-01A-11R-2403-07	0.491654	0.735599	0.814971	0.584652	0.734638	0.737846	0.419007	0.736865	0.530217	0.810097	0.826829	0.540473	0.477701	0.785323	0.509704	0.75098	0.248437	0.769395	0.713	0.665199	0.618677	0.439228	0.715393
TCGA-55-6970-01A-11R-1949-07	0.647686	0.78357	0.793841	0.689748	0.755527	0.794285	0.494518	0.747657	0.671466	0.787411	0.881816	0.651065	0.663264	0.83153	0.584716	0.724014	0.529004	0.767798	0.762393	0.711681	0.668538	0.486628	0.733197
TCGA-05-4420-01A-01R-1206-07	0.41113	0.678645	0.691033	0.646656	0.699589	0.836071	0.356411	0.709723	0.438879	0.838229	0.807129	0.498958	0.514392	0.823384	0.501831	0.681834	0.565168	0.796222	0.674324	0.57023	0.583827	0.474036	0.655933
TCGA-86-7701-01A-11R-2170-07	0.719845	0.821822	0.860291	0.655329	0.749128	0.815878	0.420169	0.708257	0.714168	0.780774	0.877042	0.555319	0.568512	0.827419	0.540484	0.777176	0.429391	0.72056	0.743076	0.667677	0.673352	0.620643	0.69864
TCGA-NJ-A55R-01A-11R-A262-07	0.602917	0.59406	0.642033	0.586873	0.701264	0.798377	0.349094	0.639836	0.561281	0.737716	0.745652	0.495613	0.511914	0.796383	0.450493	0.696356	0.320786	0.712023	0.603396	0.585474	0.580292	0.514712	0.564993
TCGA-05-4397-01A-01R-1206-07	0.356618	0.742204	0.691253	0.598199	0.740005	0.768962	0.29136	0.741974	0.490993	0.791258	0.823148	0.541942	0.341005	0.834026	0.511831	0.679353	0.339753	0.79423	0.72573	0.615084	0.57813	0.445489	0.646464
TCGA-53-7626-01A-12R-2066-07	0.681292	0.76884	0.848095	0.70042	0.768075	0.741995	0.553571	0.754064	0.694325	0.84273	0.925102	0.626251	0.796569	0.839737	0.600764	0.775491	0.508161	0.76222	0.807901	0.719367	0.68163	0.534321	0.692616
TCGA-95-7944-01A-11R-2187-07	0.545339	0.760555	0.902753	0.662336	0.781607	0.784175	0.355178	0.754082	0.595415	0.743642	0.912937	0.6584	0.464815	0.820639	0.628404	0.778177	0.390549	0.74973	0.768653	0.697815	0.686774	0.458548	0.707189
TCGA-44-2656-01B-06R-A277-07	0.329792	0.711464	0.653825	0.574012	0.589228	0.564142	0.406496	0.600061	0.604304	0.701537	0.733985	0.323156	0.445096	0.672042	0.377373	0.638696	0.0977192	0.595053	0.686432	0.506405	0.477215	0.287005	0.60973
TCGA-73-A9RS-01A-11R-A41B-07	0.381414	0.721949	0.743684	0.576847	0.734402	0.790295	0.405593	0.66144	0.463658	0.731724	0.772918	0.454612	0.50997	0.772659	0.500111	0.656592	0.3839	0.714018	0.585877	0.532806	0.545062	0.470452	0.631249
TCGA-44-7667-01A-31R-2066-07	0.384853	0.716529	0.703046	0.58892	0.695752	0.7849	0.364454	0.729247	0.446773	0.776851	0.809054	0.526738	0.499004	0.77596	0.608921	0.696432	0.347277	0.786859	0.675538	0.54764	0.592312	0.477499	0.639215
TCGA-NJ-A55O-01A-11R-A262-07	0.526654	0.641383	0.738253	0.612656	0.738745	0.818576	0.4657	0.75309	0.558544	0.805541	0.860993	0.593039	0.572572	0.812454	0.542513	0.719509	0.351894	0.747605	0.74081	0.646954	0.647482	0.477953	0.701929
TCGA-55-8301-01A-11R-2287-07	0.698762	0.788282	0.886454	0.682234	0.767756	0.763209	0.422443	0.748751	0.751955	0.80999	0.94965	0.598355	0.626527	0.839247	0.602562	0.764755	0.322539	0.754975	0.82365	0.693278	0.68914	0.473979	0.663623
TCGA-05-4415-01A-22R-1858-07	0.457807	0.780972	0.760053	0.601405	0.727201	0.783027	0.382698	0.785577	0.49757	0.747952	0.82733	0.518672	0.508353	0.786654	0.521237	0.721044	0.449659	0.750653	0.732507	0.594952	0.606929	0.467765	0.719502
TCGA-91-6835-01A-11R-1858-07	0.752766	0.794557	0.885504	0.693399	0.763004	0.747551	0.508424	0.749997	0.786172	0.859956	0.939117	0.647527	0.716378	0.861681	0.572949	0.805896	0.485819	0.788947	0.856346	0.711642	0.720957	0.536042	0.697525
TCGA-55-7725-01A-11R-2170-07	0.620046	0.71019	0.823419	0.703287	0.765517	0.685733	0.503222	0.692285	0.665742	0.798949	0.866126	0.567936	0.615391	0.787612	0.550579	0.731818	0.340217	0.725775	0.729982	0.633307	0.641394	0.45775	0.676359
TCGA-55-8506-01A-11R-2403-07	0.458582	0.691859	0.741355	0.644293	0.733535	0.848989	0.401318	0.69837	0.538852	0.794871	0.858192	0.53792	0.636864	0.830349	0.531077	0.720809	0.404601	0.760413	0.745805	0.667953	0.613368	0.526306	0.650049
TCGA-50-5931-01A-11R-1755-07	0.376555	0.62984	0.621302	0.514162	0.755701	0.711471	0.417939	0.649281	0.320481	0.745187	0.672694	0.403298	0.359815	0.730104	0.46041	0.664188	0.160351	0.758745	0.559332	0.565568	0.554371	0.440865	0.627051
TCGA-44-5645-01A-01R-1628-07	0.674793	0.662998	0.787036	0.687985	0.715804	0.738431	0.465585	0.739982	0.683806	0.802285	0.895517	0.563663	0.632832	0.835682	0.506259	0.782431	0.456857	0.735299	0.802846	0.699029	0.670561	0.555254	0.663294
TCGA-55-A494-01A-11R-A24X-07	0.0300413	0.537575	0.601478	0.494436	0.653574	0.806039	0.21885	0.594936	0.207	0.757936	0.601415	0.354887	0.33408	0.794669	0.368009	0.64568	0.281537	0.713013	0.531067	0.519158	0.54691	0.488085	0.605862
TCGA-50-5930-01A-11R-1755-07	0.659682	0.736549	0.803365	0.632397	0.738934	0.756235	0.462618	0.746004	0.669477	0.801949	0.892786	0.620175	0.603034	0.817544	0.550595	0.721119	0.496233	0.723768	0.772022	0.631475	0.671427	0.470934	0.670242
TCGA-38-4627-01A-01R-1206-07	0.557641	0.691951	0.779677	0.689698	0.781592	0.737953	0.426738	0.811836	0.581332	0.856925	0.923218	0.683051	0.718321	0.852799	0.592669	0.794041	0.446859	0.794866	0.852298	0.738169	0.708237	0.530893	0.682508
TCGA-67-4679-01B-01R-1755-07	0.458967	0.633313	0.728145	0.684006	0.749446	0.768044	0.497746	0.705762	0.532996	0.8703	0.878461	0.609241	0.745167	0.815895	0.509227	0.74774	0.426623	0.766623	0.742932	0.683336	0.641386	0.498182	0.634277
TCGA-55-7903-01A-11R-2170-07	0.440271	0.718809	0.816425	0.625757	0.755275	0.771209	0.355979	0.691122	0.533575	0.806067	0.856318	0.538252	0.624617	0.799191	0.527519	0.726131	0.292398	0.737031	0.724284	0.623841	0.619041	0.452389	0.66921
TCGA-55-8619-01A-11R-2403-07	0.729264	0.698739	0.843835	0.708671	0.752841	0.784627	0.481318	0.763671	0.715117	0.845767	0.946902	0.69701	0.693487	0.868225	0.599346	0.789767	0.550994	0.803046	0.831677	0.723507	0.702224	0.573337	0.659828
TCGA-05-5428-01A-01R-1628-07	0.385424	0.717787	0.743049	0.67111	0.741516	0.821264	0.350232	0.775724	0.524959	0.808675	0.854948	0.586767	0.665264	0.821249	0.557885	0.714754	0.459406	0.715639	0.769026	0.633758	0.604428	0.456236	0.645217
TCGA-55-7724-01A-11R-2170-07	0.636609	0.798793	0.784661	0.726984	0.795166	0.672628	0.518373	0.772391	0.690576	0.851486	0.881433	0.660186	0.728725	0.78081	0.612009	0.769399	0.511625	0.778126	0.795226	0.674801	0.648768	0.479442	0.713759
TCGA-97-7938-01A-11R-2170-07	0.531291	0.647551	0.72171	0.622752	0.748732	0.736842	0.505409	0.687107	0.559008	0.817066	0.80968	0.55084	0.672699	0.791742	0.522136	0.760512	0.428808	0.743727	0.708116	0.649741	0.625399	0.520636	0.67937
TCGA-50-6590-01A-12R-1858-07	0.675789	0.778255	0.816265	0.662736	0.763588	0.784805	0.394758	0.760495	0.712607	0.757853	0.944255	0.610971	0.524462	0.809635	0.591492	0.75497	0.294433	0.709168	0.863546	0.659009	0.682052	0.474184	0.632859
TCGA-69-8255-01A-11R-2287-07	0.600376	0.815237	0.886115	0.604501	0.697144	0.79769	0.375121	0.72308	0.636085	0.730544	0.872149	0.541591	0.484489	0.858262	0.576411	0.72785	0.447881	0.721093	0.70926	0.589238	0.617319	0.440017	0.665546
TCGA-73-7498-01A-12R-2187-07	0.591586	0.544004	0.738665	0.629654	0.72179	0.787754	0.400568	0.708397	0.581659	0.783825	0.860573	0.572926	0.621447	0.816941	0.505984	0.734041	0.326149	0.713418	0.716707	0.656	0.625145	0.460246	0.627543
TCGA-78-7148-01A-11R-2039-07	0.473934	0.718354	0.800884	0.662023	0.747132	0.808101	0.364543	0.736513	0.513003	0.764053	0.825312	0.529395	0.556175	0.832522	0.54654	0.725565	0.478879	0.700509	0.695465	0.629147	0.639516	0.481454	0.724372
TCGA-95-A4VN-01A-11R-A262-07	0.590636	0.798328	0.854918	0.669324	0.748148	0.799505	0.469775	0.732127	0.63953	0.84765	0.92552	0.611985	0.649109	0.833267	0.597418	0.762962	0.486982	0.759748	0.807763	0.692221	0.677786	0.52748	0.675563
TCGA-78-7152-01A-11R-2039-07	0.664625	0.717805	0.812889	0.653158	0.74522	0.831511	0.418063	0.702755	0.664788	0.783666	0.849356	0.558831	0.523441	0.820595	0.514116	0.764326	0.29704	0.718295	0.731675	0.674125	0.66459	0.482269	0.674518
TCGA-MP-A4TD-01A-32R-A262-07	0.663155	0.697773	0.776114	0.608784	0.74429	0.82913	0.470107	0.697893	0.640801	0.787173	0.854748	0.56441	0.542749	0.814983	0.523307	0.729898	0.348025	0.743926	0.74753	0.625627	0.656282	0.523605	0.657448
TCGA-55-7914-01A-11R-2170-07	0.61206	0.676429	0.788462	0.597769	0.744258	0.74777	0.377469	0.6725	0.639408	0.773014	0.826906	0.513403	0.542486	0.786891	0.483579	0.728874	0.19904	0.705983	0.629563	0.634638	0.654356	0.522267	0.662146
TCGA-44-A47A-01A-21R-A24H-07	0.452087	0.720123	0.743092	0.662036	0.77494	0.787239	0.399176	0.706536	0.561279	0.836507	0.882578	0.615319	0.529924	0.823988	0.479624	0.735513	0.380634	0.743958	0.766429	0.661202	0.63831	0.545466	0.642938
TCGA-97-A4M3-01A-11R-A24X-07	0.463758	0.617863	0.681608	0.621565	0.699709	0.823081	0.499139	0.678344	0.497362	0.759463	0.785439	0.535061	0.6108	0.794796	0.506853	0.706267	0.368188	0.711511	0.668447	0.619613	0.633307	0.494802	0.623266
TCGA-67-3773-01A-01R-0946-07	0.513621	0.671914	0.830274	0.68412	0.790082	0.721228	0.49629	0.728529	0.587757	0.821648	0.903485	0.631374	0.720544	0.802055	0.544201	0.749009	0.376664	0.727406	0.781759	0.711329	0.643002	0.573533	0.625204
TCGA-50-6593-01A-11R-1755-07	0.51312	0.685536	0.679228	0.681414	0.749958	0.84742	0.444545	0.736122	0.575982	0.866582	0.882182	0.603875	0.602883	0.838453	0.492898	0.784742	0.464698	0.743904	0.797671	0.695358	0.655765	0.535503	0.624894
TCGA-73-4659-01A-01R-1206-07	0.479345	0.700634	0.692997	0.658371	0.734695	0.840811	0.493552	0.772284	0.533705	0.82927	0.871664	0.652897	0.697161	0.837361	0.551629	0.73087	0.577784	0.754004	0.792005	0.680291	0.653662	0.505473	0.711244
TCGA-38-4630-01A-01R-1206-07	0.3564	0.733129	0.720811	0.551693	0.754453	0.755645	0.353333	0.710094	0.417409	0.71815	0.749966	0.461314	0.459368	0.728898	0.473402	0.710804	0.159806	0.78661	0.739855	0.587398	0.552597	0.429106	0.608841
TCGA-78-7540-01A-11R-2066-07	0.486156	0.598204	0.715281	0.61264	0.73712	0.815594	0.414851	0.734036	0.534759	0.787097	0.802707	0.532128	0.540412	0.833497	0.533143	0.732938	0.433646	0.753204	0.690114	0.661745	0.609069	0.571639	0.668088
TCGA-J2-A4AD-01A-11R-A24H-07	0.303695	0.631776	0.630296	0.562974	0.730681	0.753843	0.343736	0.682449	0.3618	0.78897	0.738519	0.430043	0.437272	0.762151	0.418959	0.69209	0.342517	0.738245	0.602459	0.513339	0.566623	0.421374	0.596233
TCGA-44-6778-01A-11R-1858-07	0.707729	0.839325	0.879275	0.691346	0.743106	0.752531	0.528862	0.761596	0.767354	0.834062	0.954588	0.664157	0.733453	0.846047	0.606901	0.809921	0.482071	0.796226	0.872407	0.737433	0.682303	0.483995	0.733572
TCGA-38-A44F-01A-11R-A24H-07	0.724905	0.676717	0.830452	0.695779	0.752923	0.785318	0.509572	0.722623	0.693137	0.839025	0.913209	0.657387	0.641386	0.84181	0.57732	0.781284	0.489097	0.789359	0.810511	0.712279	0.687109	0.565513	0.650981
TCGA-50-6592-01A-11R-1755-07	0.548275	0.778717	0.832346	0.653529	0.754391	0.792307	0.406588	0.777275	0.636593	0.782299	0.933299	0.603624	0.60864	0.82251	0.594055	0.760845	0.439639	0.799415	0.806816	0.682916	0.685733	0.542449	0.697312
TCGA-44-6775-01A-11R-A278-07	0.479505	0.702753	0.674989	0.634847	0.71035	0.723641	0.357015	0.742328	0.583095	0.825106	0.889903	0.620052	0.562801	0.817679	0.440622	0.776182	0.341016	0.781244	0.860683	0.67915	0.63885	0.483377	0.711474
TCGA-95-8494-01A-11R-2326-07	0.364987	0.699568	0.702053	0.681898	0.724427	0.802168	0.449934	0.720248	0.499349	0.799241	0.868192	0.533655	0.552615	0.817479	0.486818	0.705263	0.357478	0.71876	0.764857	0.636037	0.605463	0.428623	0.620568
TCGA-44-2656-01A-02R-0946-07	0.642759	0.768118	0.884078	0.720074	0.75774	0.831657	0.459197	0.765194	0.726887	0.848947	0.929316	0.644736	0.690468	0.861712	0.602547	0.766874	0.419825	0.768945	0.837121	0.694562	0.674016	0.505412	0.677461
TCGA-50-5055-01A-01R-1628-07	0.87182	0.774805	0.89809	0.71075	0.789326	0.804453	0.513682	0.749662	0.838268	0.818618	0.934571	0.660221	0.694912	0.881381	0.599765	0.793617	0.411019	0.766846	0.835169	0.75156	0.737456	0.559918	0.680912
TCGA-75-5147-01A-01R-1628-07	0.615899	0.757132	0.796114	0.683791	0.771513	0.783348	0.388879	0.744744	0.620092	0.842191	0.899135	0.630578	0.62848	0.817449	0.501634	0.752174	0.419704	0.814121	0.786691	0.670153	0.676229	0.534407	0.676078
TCGA-86-8278-01A-11R-2287-07	0.500818	0.648777	0.760632	0.664219	0.758353	0.805092	0.396081	0.695862	0.553191	0.772679	0.870462	0.558442	0.573566	0.799781	0.499357	0.773926	0.434782	0.748157	0.745128	0.651853	0.646211	0.515246	0.651793
TCGA-05-4250-01A-01R-1107-07	0.518352	0.8006	0.839244	0.680978	0.762193	0.814151	0.447697	0.761534	0.59538	0.806437	0.882118	0.601841	0.615353	0.841771	0.582867	0.774143	0.425005	0.767854	0.819633	0.697313	0.687283	0.509704	0.666487
TCGA-4B-A93V-01A-11R-A39D-07	0.509233	0.694747	0.785229	0.558531	0.674422	0.84593	0.463273	0.652882	0.595496	0.760276	0.823031	0.436607	0.432751	0.822601	0.47746	0.702728	0.310472	0.69934	0.642544	0.530747	0.580165	0.526689	0.669703
TCGA-86-7713-01A-11R-2066-07	0.456346	0.686597	0.670051	0.569524	0.704767	0.821421	0.434739	0.707413	0.497088	0.781836	0.768233	0.453907	0.489484	0.800413	0.489237	0.68999	0.405448	0.715495	0.65992	0.59737	0.608038	0.51543	0.761105
TCGA-55-6982-01A-11R-1949-07	0.599396	0.715025	0.725772	0.679584	0.768691	0.828684	0.371143	0.730638	0.61345	0.806358	0.892241	0.574908	0.540644	0.830719	0.513405	0.759481	0.397613	0.772254	0.829486	0.698317	0.655975	0.517586	0.671142
TCGA-67-6217-01A-11R-1755-07	0.634803	0.647486	0.810743	0.664633	0.740305	0.802859	0.496139	0.727881	0.643328	0.826882	0.866482	0.548395	0.62102	0.83689	0.495067	0.7466	0.35303	0.728582	0.759826	0.66472	0.647565	0.52637	0.634066
TCGA-44-6146-01A-11R-A278-07	0.275872	0.56376	0.621706	0.524185	0.646615	0.742767	0.381822	0.617732	0.36258	0.747098	0.702604	0.394213	0.486848	0.761813	0.390473	0.692609	0.387116	0.69554	0.561966	0.593987	0.54274	0.546823	0.641195
TCGA-49-4512-01A-21R-1858-07	0.534545	0.59468	0.702904	0.648953	0.748466	0.792637	0.379527	0.701175	0.574088	0.802857	0.881673	0.621271	0.602232	0.853263	0.466776	0.750458	0.346871	0.737349	0.763539	0.643793	0.624191	0.498493	0.597292
TCGA-64-5774-01A-01R-1628-07	0.487164	0.707054	0.707761	0.620175	0.672976	0.822289	0.370862	0.696485	0.473423	0.763337	0.78087	0.424782	0.384743	0.778359	0.563559	0.721799	0.421411	0.745378	0.653092	0.567063	0.605774	0.573228	0.688817
TCGA-97-8177-01A-11R-2287-07	0.633097	0.679088	0.816344	0.702553	0.772847	0.788662	0.476345	0.758064	0.656057	0.861368	0.939565	0.675601	0.744202	0.851628	0.549695	0.773793	0.440342	0.792807	0.827272	0.70442	0.673468	0.503172	0.65373
TCGA-78-8640-01A-11R-2403-07	0.527305	0.700829	0.760063	0.605899	0.733523	0.787147	0.341585	0.728346	0.613303	0.795855	0.830556	0.51969	0.565959	0.828276	0.505607	0.71569	0.33685	0.729148	0.71633	0.576216	0.618381	0.435711	0.622931
TCGA-95-7947-01A-11R-2187-07	0.580274	0.7474	0.779343	0.606427	0.761109	0.73551	0.419201	0.726977	0.620777	0.811109	0.835671	0.531444	0.560785	0.827023	0.513441	0.736398	0.426862	0.73549	0.708403	0.589444	0.620083	0.543376	0.672815
TCGA-44-6777-01A-11R-1858-07	0.666928	0.724591	0.78732	0.716822	0.762401	0.804789	0.486897	0.810526	0.728965	0.861493	0.978046	0.719473	0.727853	0.880686	0.622915	0.795139	0.492628	0.792807	0.915517	0.762309	0.717209	0.52291	0.683341
TCGA-55-7816-01A-11R-2170-07	0.478171	0.577459	0.781852	0.639054	0.751765	0.687453	0.395864	0.776666	0.629526	0.906644	0.930839	0.663474	0.614706	0.864128	0.581725	0.810037	0.380966	0.787825	0.796184	0.725912	0.687686	0.428561	0.635948
TCGA-49-AAR4-01A-12R-A41B-07	0.625409	0.770549	0.899645	0.638019	0.747558	0.800715	0.4337	0.700345	0.620539	0.808681	0.900129	0.541113	0.518753	0.833182	0.564448	0.766454	0.327684	0.773851	0.757243	0.643718	0.650803	0.432568	0.63627
TCGA-55-7907-01A-11R-2170-07	0.530272	0.704695	0.820389	0.644815	0.737097	0.833227	0.398222	0.732151	0.57367	0.81059	0.863521	0.578283	0.603414	0.830551	0.521054	0.760163	0.339918	0.723407	0.739977	0.65631	0.674612	0.495752	0.669974
TCGA-86-8359-01A-11R-2326-07	0.493261	0.707152	0.87079	0.673861	0.783872	0.804764	0.415239	0.677928	0.515643	0.780295	0.865874	0.552111	0.547494	0.797216	0.547227	0.751133	0.587273	0.767718	0.717427	0.663442	0.668238	0.493333	0.724038
TCGA-50-5051-01A-21R-1858-07	0.547851	0.679973	0.69103	0.61049	0.732217	0.854631	0.429292	0.651984	0.504731	0.788173	0.762318	0.469597	0.53903	0.829875	0.463104	0.70435	0.35264	0.720728	0.627603	0.556012	0.585272	0.506267	0.662866
TCGA-05-4402-01A-01R-1206-07	0.578486	0.67424	0.721999	0.678452	0.759013	0.786099	0.363619	0.757184	0.628654	0.830159	0.871918	0.596791	0.592028	0.826558	0.530549	0.75956	0.454834	0.776774	0.780243	0.684451	0.656056	0.46833	0.687391
TCGA-50-8459-01A-11R-2326-07	0.681195	0.673206	0.762533	0.729897	0.752352	0.819458	0.451119	0.757933	0.681059	0.854413	0.952187	0.726088	0.665155	0.859735	0.579014	0.790443	0.413049	0.782892	0.893343	0.741118	0.705172	0.506324	0.642259
TCGA-NJ-A7XG-01A-12R-A39D-07	0.350247	0.529056	0.638677	0.613961	0.741098	0.749059	0.35945	0.608537	0.351422	0.78024	0.750259	0.407963	0.490345	0.773091	0.404914	0.681606	0.284636	0.65275	0.536242	0.564994	0.56356	0.487957	0.605563
TCGA-49-4488-01A-01R-1755-07	0.593177	0.729669	0.804846	0.703776	0.784896	0.842124	0.421671	0.737421	0.609027	0.798558	0.865529	0.563138	0.596321	0.850134	0.553219	0.727748	0.412112	0.702618	0.756869	0.671192	0.641242	0.503931	0.65197
TCGA-64-5815-01A-01R-1628-07	0.547259	0.72168	0.749388	0.707169	0.78034	0.813139	0.448167	0.785789	0.621857	0.803748	0.927539	0.65894	0.670455	0.826013	0.558977	0.781835	0.37572	0.761314	0.863779	0.703807	0.693262	0.537945	0.701287
TCGA-86-8056-01A-11R-2241-07	0.547813	0.630826	0.711298	0.658255	0.72367	0.71971	0.50702	0.716448	0.596799	0.853263	0.858796	0.560491	0.642786	0.812877	0.49864	0.745754	0.429254	0.77948	0.768538	0.656099	0.639973	0.544334	0.651362
TCGA-78-8655-01A-11R-2403-07	0.555206	0.667664	0.799136	0.697828	0.753874	0.775883	0.362245	0.73665	0.5884	0.802693	0.900532	0.620933	0.70746	0.831547	0.547338	0.767547	0.436766	0.740154	0.770109	0.643368	0.65221	0.503658	0.659532
TCGA-MP-A4TF-01A-11R-A262-07	0.438511	0.666606	0.717123	0.621383	0.736659	0.806949	0.359638	0.725786	0.493702	0.746056	0.783731	0.487888	0.446265	0.771141	0.496752	0.692919	0.397715	0.729534	0.671427	0.580975	0.568076	0.501014	0.674902
TCGA-55-8203-01A-11R-2241-07	0.679683	0.732318	0.810066	0.654952	0.719368	0.847097	0.336799	0.69424	0.679524	0.768278	0.861225	0.544797	0.532183	0.812071	0.497769	0.750128	0.404361	0.714324	0.744977	0.633269	0.640626	0.549137	0.676142
TCGA-91-6848-01A-11R-1949-07	0.569085	0.817863	0.828413	0.693368	0.717125	0.749738	0.459913	0.763837	0.622869	0.78275	0.912845	0.690369	0.59977	0.817903	0.623814	0.738216	0.430569	0.813286	0.843109	0.69458	0.701954	0.445715	0.675747
TCGA-86-8073-01A-11R-2241-07	0.439777	0.643445	0.700062	0.602613	0.7073	0.743265	0.396765	0.716567	0.524523	0.835385	0.830837	0.573524	0.615237	0.814795	0.501004	0.733913	0.309894	0.761439	0.75832	0.628449	0.634588	0.447662	0.642463
TCGA-64-5775-01A-01R-1628-07	0.323768	0.703407	0.652038	0.645253	0.727836	0.664773	0.329489	0.767796	0.520945	0.751922	0.844868	0.628148	0.537312	0.804789	0.552394	0.707383	0.264307	0.740332	0.74988	0.608122	0.589642	0.407278	0.641108
TCGA-44-7659-01A-11R-2066-07	0.576793	0.594819	0.724346	0.633226	0.733586	0.746336	0.487601	0.698792	0.600896	0.832223	0.847022	0.528215	0.541559	0.792288	0.481989	0.72902	0.331244	0.726511	0.676751	0.599689	0.591352	0.491562	0.583537
TCGA-55-A4DG-01A-11R-A24H-07	0.654998	0.618576	0.764252	0.59562	0.734784	0.743316	0.4506	0.723463	0.647357	0.781485	0.838294	0.542664	0.597875	0.81189	0.456628	0.707184	0.240145	0.721891	0.671799	0.625724	0.598198	0.481152	0.626932
TCGA-55-6985-01A-11R-1949-07	0.613052	0.750074	0.819771	0.689014	0.765586	0.790723	0.508519	0.724826	0.649974	0.837922	0.904343	0.609777	0.663172	0.831775	0.628258	0.759007	0.51117	0.771163	0.808251	0.691713	0.672961	0.515224	0.712554
TCGA-86-8054-01A-11R-2241-07	0.370111	0.713301	0.671261	0.591861	0.742094	0.763923	0.400636	0.724145	0.456359	0.823996	0.786149	0.5299	0.537301	0.760866	0.483411	0.711306	0.36093	0.736602	0.694412	0.626999	0.581299	0.509176	0.704943
TCGA-38-4629-01A-02R-1206-07	0.573622	0.765076	0.83992	0.713978	0.773968	0.776678	0.429138	0.789785	0.657706	0.808468	0.943091	0.688956	0.653674	0.832047	0.646267	0.776852	0.420609	0.796667	0.871869	0.734541	0.692318	0.505672	0.677815
TCGA-78-7147-01A-11R-2039-07	0.421338	0.666995	0.768076	0.622572	0.756344	0.748757	0.342983	0.712353	0.440013	0.796127	0.81306	0.500957	0.554525	0.822715	0.469759	0.720803	0.34052	0.755636	0.67718	0.61594	0.612606	0.443128	0.688127
TCGA-55-8092-01A-11R-2241-07	0.637042	0.705889	0.845761	0.591303	0.716431	0.742651	0.391439	0.694908	0.682526	0.726702	0.887427	0.545427	0.486363	0.78902	0.474183	0.719784	0.326633	0.733424	0.72912	0.581538	0.655738	0.471185	0.660838
TCGA-75-6205-01A-11R-1755-07	0.682871	0.802183	0.872118	0.684531	0.774383	0.773366	0.456767	0.760619	0.723071	0.833676	0.958567	0.690973	0.701661	0.845978	0.613661	0.783212	0.430727	0.784518	0.871307	0.715219	0.708662	0.487372	0.707108
TCGA-86-A456-01A-11R-A24H-07	0.459575	0.705591	0.785457	0.648333	0.745961	0.776703	0.526622	0.733745	0.587319	0.828229	0.896921	0.583554	0.693952	0.844361	0.505401	0.7566	0.340294	0.787298	0.76715	0.653928	0.650375	0.503904	0.671689
TCGA-55-8302-01A-11R-2326-07	0.564589	0.685115	0.763321	0.641612	0.74852	0.830598	0.348701	0.739999	0.597768	0.805121	0.86142	0.573353	0.582747	0.827783	0.520552	0.743031	0.398865	0.728536	0.745645	0.664027	0.642797	0.478968	0.634549
TCGA-05-4384-01A-01R-1755-07	0.435079	0.598976	0.704688	0.671481	0.71325	0.77376	0.469359	0.757622	0.511548	0.817179	0.862991	0.581107	0.660508	0.833008	0.528808	0.724974	0.488982	0.762362	0.758889	0.669145	0.61669	0.491466	0.64116
TCGA-55-8511-01A-11R-2403-07	0.692193	0.774469	0.812258	0.665862	0.742545	0.816709	0.433652	0.709694	0.70619	0.788668	0.900373	0.557766	0.604984	0.838532	0.574658	0.750267	0.465567	0.759515	0.769055	0.651112	0.681098	0.572937	0.668152
TCGA-97-7941-01A-11R-2187-07	0.552547	0.588497	0.756564	0.630435	0.729282	0.796562	0.411712	0.739992	0.554187	0.827777	0.855495	0.584316	0.629157	0.859506	0.537641	0.771157	0.419334	0.750701	0.761131	0.657801	0.660324	0.553218	0.633863
TCGA-62-8397-01A-11R-2326-07	0.506497	0.548449	0.692097	0.655197	0.748698	0.763121	0.434036	0.743958	0.562903	0.826341	0.869252	0.58631	0.590879	0.8398	0.448308	0.734126	0.367033	0.765019	0.718687	0.641858	0.615294	0.529162	0.600414
TCGA-91-6830-01A-11R-1949-07	0.517175	0.715965	0.793352	0.697853	0.768051	0.716759	0.467571	0.753116	0.588186	0.842675	0.855764	0.633389	0.695928	0.820038	0.609699	0.777447	0.525029	0.818368	0.776832	0.690039	0.689694	0.484343	0.657347
TCGA-44-3398-01A-01R-1107-07	0.595602	0.725514	0.826102	0.723477	0.773181	0.754537	0.483052	0.788176	0.633881	0.852851	0.915676	0.680839	0.690081	0.832988	0.57935	0.762754	0.509944	0.753532	0.84712	0.708772	0.69471	0.510269	0.697582
TCGA-55-7913-01B-11R-2241-07	0.384562	0.710581	0.696243	0.587287	0.722883	0.795278	0.284305	0.704809	0.420155	0.767586	0.766602	0.444237	0.427702	0.80478	0.447167	0.657528	0.488712	0.765819	0.642036	0.565574	0.577847	0.494131	0.693415
TCGA-44-2656-01A-02R-A278-07	0.567903	0.808589	0.820572	0.679763	0.691828	0.72682	0.458016	0.722671	0.713142	0.810791	0.868317	0.538882	0.636328	0.792578	0.483633	0.750468	0.287237	0.681535	0.795092	0.611455	0.597374	0.438789	0.69954
TCGA-55-1592-01A-01R-0946-07	0.442038	0.672344	0.694904	0.640794	0.728551	0.752481	0.402354	0.750149	0.558012	0.860303	0.863242	0.586112	0.674859	0.823286	0.499237	0.742514	0.392714	0.776513	0.786885	0.66328	0.628404	0.471612	0.626918
TCGA-91-A4BD-01A-11R-A24H-07	0.520554	0.608063	0.774166	0.696339	0.741604	0.76198	0.48754	0.738275	0.569801	0.857717	0.916159	0.66409	0.719782	0.848638	0.523707	0.710917	0.499216	0.754593	0.726439	0.619188	0.618538	0.518775	0.605262
TCGA-78-7149-01A-11R-2039-07	0.471233	0.56148	0.712752	0.579537	0.716261	0.806973	0.383355	0.681674	0.461858	0.739453	0.757153	0.486946	0.486176	0.815534	0.525571	0.698331	0.385689	0.694168	0.588173	0.564747	0.606485	0.501098	0.579494
TCGA-78-7535-01A-11R-2066-07	0.357942	0.638322	0.692686	0.616848	0.707765	0.801269	0.389496	0.690095	0.462846	0.791832	0.887484	0.53599	0.532393	0.874266	0.507453	0.751626	0.386135	0.72691	0.703797	0.659231	0.60307	0.460253	0.663343
TCGA-49-6742-01A-11R-1858-07	0.347333	0.662437	0.666788	0.596929	0.745374	0.793535	0.384024	0.758483	0.381794	0.756938	0.76787	0.582828	0.517955	0.834156	0.462341	0.685868	0.503515	0.752581	0.596692	0.572958	0.606419	0.491036	0.696256
TCGA-05-4249-01A-01R-1107-07	0.607395	0.613465	0.734051	0.671875	0.756077	0.773949	0.468015	0.695807	0.636566	0.834936	0.863035	0.594888	0.669403	0.828559	0.494163	0.759248	0.451856	0.745426	0.774464	0.677073	0.635505	0.570536	0.626583
TCGA-64-1679-01A-21R-2066-07	0.445966	0.674399	0.657581	0.684618	0.753535	0.786474	0.357843	0.735926	0.548049	0.805849	0.889663	0.599223	0.548085	0.844396	0.554374	0.770862	0.423129	0.782125	0.826824	0.665793	0.647435	0.489811	0.6669
TCGA-69-7760-01A-11R-2170-07	0.27541	0.617164	0.585977	0.532928	0.753988	0.771922	0.33831	0.704055	0.343659	0.747667	0.719543	0.448891	0.477977	0.812343	0.413326	0.714417	0.192818	0.733696	0.629968	0.53657	0.532174	0.457934	0.644878
TCGA-05-4405-01A-21R-1858-07	0.544723	0.631954	0.71153	0.63952	0.745779	0.810505	0.41153	0.70721	0.594098	0.834878	0.849655	0.585549	0.679044	0.808904	0.503911	0.757682	0.364531	0.738469	0.736729	0.671498	0.645743	0.527099	0.643682
TCGA-55-6987-01A-11R-1949-07	0.766361	0.808234	0.906524	0.698346	0.766357	0.742463	0.476843	0.762061	0.765263	0.824084	0.955038	0.686326	0.643401	0.839198	0.63832	0.78141	0.503017	0.778026	0.849734	0.717157	0.719831	0.527288	0.738826
TCGA-05-5429-01A-01R-1628-07	0.466304	0.701201	0.732459	0.601697	0.711212	0.778036	0.427173	0.737779	0.522017	0.797533	0.79401	0.558243	0.59183	0.802893	0.501573	0.718004	0.411285	0.767788	0.642368	0.620557	0.616247	0.582822	0.68249
TCGA-55-A48X-01A-11R-A24H-07	0.774907	0.7001	0.825473	0.644412	0.74064	0.761842	0.451736	0.726975	0.74835	0.827521	0.884268	0.575974	0.6323	0.82367	0.514185	0.756222	0.403767	0.738859	0.75088	0.682479	0.658133	0.483385	0.637678
TCGA-86-8673-01A-11R-2403-07	0.49405	0.686806	0.791448	0.61548	0.743326	0.797576	0.327226	0.701557	0.483958	0.758466	0.850247	0.543358	0.47504	0.82939	0.554008	0.7223	0.463516	0.738583	0.699748	0.58029	0.624549	0.493058	0.671333
TCGA-86-8674-01A-21R-2403-07	0.446029	0.598833	0.688893	0.577623	0.709593	0.805815	0.407165	0.642583	0.418961	0.749746	0.716722	0.456972	0.404825	0.780006	0.440388	0.687269	0.402542	0.679589	0.544769	0.574403	0.583483	0.481987	0.609711
TCGA-49-6744-01A-11R-1858-07	0.662716	0.754256	0.850818	0.703929	0.792747	0.810882	0.481527	0.774853	0.678175	0.830823	0.937447	0.680449	0.729722	0.848773	0.595591	0.799395	0.467691	0.790655	0.845616	0.716615	0.698739	0.505065	0.696467
TCGA-44-5643-01A-01R-1628-07	0.607719	0.792886	0.804764	0.614286	0.777103	0.724471	0.391079	0.701716	0.618126	0.788941	0.805084	0.529051	0.509786	0.795639	0.57076	0.706727	0.32299	0.784181	0.688157	0.61754	0.630123	0.433984	0.657091
TCGA-05-4382-01A-01R-1206-07	0.58931	0.70511	0.757227	0.641432	0.727696	0.760659	0.378369	0.776154	0.689725	0.808698	0.938124	0.639107	0.610485	0.823392	0.598944	0.770553	0.444986	0.795058	0.880427	0.680181	0.697951	0.503125	0.636233
TCGA-49-AARQ-01A-11R-A41B-07	0.478925	0.714827	0.778165	0.601951	0.765799	0.786333	0.381736	0.658031	0.551845	0.798398	0.826535	0.469124	0.449413	0.807299	0.561596	0.727002	0.274333	0.737666	0.589743	0.595339	0.583671	0.476143	0.622845
TCGA-55-8094-01A-11R-2241-07	0.272468	0.62458	0.639309	0.49539	0.717684	0.777643	0.301826	0.664346	0.276966	0.697626	0.632189	0.357143	0.386565	0.791918	0.459677	0.575695	0.384261	0.742577	0.573875	0.531837	0.482119	0.519048	0.646606
TCGA-MP-A4TC-01A-11R-A24X-07	0.483814	0.762314	0.789952	0.650953	0.751885	0.802973	0.370998	0.744569	0.583811	0.813156	0.89437	0.575898	0.582505	0.816943	0.571881	0.782306	0.42839	0.741988	0.840485	0.65609	0.66203	0.521007	0.689992
TCGA-49-AAR0-01A-21R-A39D-07	0.628871	0.695383	0.805277	0.620068	0.746914	0.822518	0.471714	0.728352	0.617906	0.820727	0.898603	0.618726	0.580264	0.833867	0.531625	0.743765	0.361302	0.723807	0.758314	0.67598	0.642148	0.503896	0.649926
TCGA-05-4427-01A-21R-1858-07	0.499971	0.748421	0.753721	0.667702	0.768745	0.811678	0.471088	0.740663	0.590166	0.786089	0.872227	0.579337	0.611334	0.824516	0.552219	0.755354	0.322714	0.769118	0.791084	0.627607	0.628288	0.417091	0.677566
TCGA-75-6214-01A-41R-1949-07	0.298936	0.656775	0.66949	0.589798	0.776144	0.79927	0.271483	0.735612	0.390372	0.803408	0.76132	0.474715	0.391876	0.778896	0.511475	0.728387	0.555091	0.754746	0.669795	0.592137	0.595493	0.510248	0.663355
TCGA-69-7763-01A-11R-2170-07	0.575415	0.629662	0.727426	0.649876	0.723644	0.786244	0.497712	0.731673	0.599622	0.795055	0.827453	0.561325	0.637878	0.797083	0.561368	0.756844	0.42317	0.721496	0.729295	0.684102	0.648674	0.483665	0.653306
TCGA-86-8076-01A-31R-2241-07	0.724828	0.702648	0.864386	0.680259	0.758468	0.773082	0.48667	0.720997	0.67946	0.821898	0.904884	0.638996	0.655257	0.844547	0.524115	0.766334	0.526254	0.772658	0.776819	0.683833	0.689928	0.543212	0.688294
TCGA-62-A46V-01A-11R-A24H-07	0.281286	0.599681	0.637716	0.619445	0.76222	0.798838	0.351175	0.712183	0.360842	0.81492	0.826435	0.523892	0.549137	0.818793	0.441492	0.742779	0.317199	0.728321	0.724068	0.621167	0.587981	0.494986	0.559103
TCGA-55-A48Y-01A-11R-A24H-07	0.565763	0.724436	0.7513	0.622335	0.729194	0.806926	0.406384	0.726494	0.606966	0.728054	0.832905	0.584274	0.533614	0.799245	0.540389	0.729901	0.411595	0.751773	0.71631	0.652285	0.647455	0.473425	0.677718
TCGA-71-6725-01A-11R-1858-07	0.374101	0.555558	0.564202	0.61581	0.699435	0.769873	0.391752	0.67342	0.483194	0.744907	0.773184	0.485026	0.533201	0.834489	0.431258	0.702959	0.436556	0.719159	0.644389	0.585856	0.546093	0.484071	0.592633
TCGA-55-6642-01A-11R-1858-07	0.624073	0.717173	0.819316	0.644078	0.751508	0.842125	0.425194	0.748252	0.710368	0.796075	0.872212	0.565289	0.598485	0.825827	0.58638	0.78238	0.46114	0.786436	0.791545	0.606393	0.686186	0.50366	0.708374
TCGA-78-7220-01A-11R-2039-07	0.325547	0.709963	0.705127	0.608003	0.717634	0.779595	0.313528	0.70808	0.392477	0.775083	0.761795	0.499228	0.523744	0.782785	0.525654	0.67205	0.411522	0.739438	0.645086	0.602625	0.622727	0.518523	0.702745
TCGA-L9-A8F4-01A-11R-A39D-07	0.63043	0.74313	0.851173	0.606298	0.729744	0.810821	0.399058	0.716924	0.672982	0.752339	0.914812	0.586627	0.547843	0.815352	0.52126	0.735611	0.323404	0.7521	0.788654	0.646666	0.637903	0.436484	0.580187
TCGA-35-5375-01A-01R-1628-07	0.56997	0.76909	0.834803	0.657609	0.776784	0.725384	0.418509	0.680915	0.621236	0.806139	0.842267	0.56317	0.578333	0.77968	0.560236	0.723242	0.379974	0.734303	0.750226	0.639812	0.622166	0.480057	0.625549
TCGA-50-5939-01A-11R-1628-07	0.658036	0.766415	0.740396	0.68361	0.762307	0.776073	0.511816	0.777928	0.681558	0.803386	0.901056	0.667767	0.672373	0.829093	0.623174	0.766693	0.562332	0.791662	0.866403	0.701859	0.682105	0.516171	0.708858
TCGA-55-8510-01A-11R-2403-07	0.591065	0.717017	0.81373	0.689423	0.766466	0.799974	0.418606	0.753777	0.643721	0.839334	0.944161	0.63397	0.680808	0.86023	0.596666	0.77825	0.465371	0.762617	0.817729	0.716365	0.695158	0.554276	0.646126
TCGA-38-6178-01A-11R-1755-07	0.556059	0.67767	0.698743	0.64229	0.761909	0.765123	0.438601	0.729772	0.578908	0.801282	0.829151	0.553321	0.627881	0.822368	0.515564	0.758684	0.389384	0.740574	0.730392	0.64407	0.648253	0.464965	0.667564
TCGA-MN-A4N4-01A-12R-A24X-07	0.475643	0.622071	0.717922	0.6241	0.777363	0.762941	0.337988	0.709104	0.516472	0.786081	0.854855	0.507971	0.600692	0.781633	0.519355	0.742047	0.407591	0.738261	0.723835	0.612721	0.610747	0.432017	0.551329
TCGA-44-7662-01A-11R-2066-07	0.506574	0.74672	0.800109	0.63078	0.76144	0.833955	0.372203	0.765499	0.597369	0.803197	0.88995	0.55914	0.611083	0.822043	0.623608	0.762519	0.432834	0.761229	0.818757	0.65723	0.64718	0.478749	0.657149
TCGA-MP-A4T4-01A-11R-A262-07	0.63656	0.755514	0.880794	0.629961	0.774973	0.800886	0.400149	0.724503	0.689198	0.818054	0.934082	0.586523	0.611537	0.827645	0.598697	0.767706	0.385984	0.779801	0.838416	0.699075	0.689322	0.452843	0.634668
TCGA-95-A4VP-01A-21R-A262-07	0.671514	0.747253	0.825364	0.633799	0.735758	0.825727	0.482209	0.694423	0.628993	0.812926	0.867163	0.596498	0.608602	0.834138	0.528611	0.776308	0.48494	0.774594	0.722324	0.651608	0.641262	0.593926	0.6871
TCGA-55-8206-01A-11R-2241-07	0.59623	0.617243	0.734924	0.711989	0.731842	0.741026	0.513811	0.735879	0.647324	0.846035	0.91987	0.672152	0.768879	0.875762	0.526696	0.777116	0.498972	0.779901	0.775787	0.723626	0.667024	0.498181	0.603121
TCGA-86-8585-01A-11R-2403-07	0.623259	0.791132	0.844293	0.629681	0.739333	0.790335	0.394337	0.736973	0.673253	0.771626	0.941523	0.591109	0.58692	0.826845	0.573704	0.713318	0.391265	0.745818	0.762309	0.611235	0.646579	0.457743	0.622142
TCGA-95-7562-01A-11R-2241-07	0.460287	0.7392	0.744023	0.614401	0.753749	0.731496	0.377278	0.700426	0.577513	0.803186	0.867113	0.521658	0.55717	0.786585	0.505987	0.730287	0.364001	0.726476	0.745236	0.668488	0.6373	0.443157	0.703343
TCGA-05-4426-01A-01R-1206-07	0.399767	0.647136	0.71777	0.664117	0.750371	0.746847	0.336769	0.720953	0.45578	0.833241	0.866817	0.602572	0.580436	0.840724	0.539321	0.749046	0.451033	0.761804	0.80976	0.663036	0.625236	0.45213	0.623812
TCGA-55-8508-01A-11R-2403-07	0.623352	0.639926	0.748108	0.639625	0.714744	0.84482	0.394511	0.703595	0.644569	0.8025	0.862595	0.542436	0.469318	0.814478	0.577165	0.740951	0.533278	0.786381	0.720708	0.62935	0.641515	0.506476	0.627961
TCGA-99-8025-01A-11R-2241-07	0.527261	0.625847	0.699022	0.625886	0.731585	0.802569	0.413751	0.668766	0.547098	0.828728	0.798217	0.509576	0.455777	0.804183	0.478003	0.730605	0.388148	0.718682	0.654362	0.641281	0.603676	0.529966	0.622802
TCGA-44-7672-01A-11R-2066-07	0.742111	0.78673	0.844987	0.712444	0.767253	0.806704	0.456333	0.760721	0.723967	0.805613	0.949657	0.66245	0.66825	0.841985	0.649557	0.786284	0.448372	0.757085	0.856609	0.722862	0.710633	0.561808	0.689907
TCGA-NJ-A4YG-01A-22R-A262-07	0.510544	0.643143	0.76863	0.691429	0.762655	0.770014	0.41185	0.72822	0.546278	0.805656	0.867274	0.614198	0.601271	0.805886	0.537628	0.750788	0.373939	0.717834	0.739005	0.648491	0.627415	0.513895	0.620719
TCGA-44-8117-01A-11R-2241-07	0.475122	0.653584	0.730752	0.598968	0.713939	0.785616	0.437812	0.714778	0.512779	0.775999	0.826547	0.530681	0.613987	0.77672	0.458433	0.728765	0.312843	0.737395	0.744153	0.627887	0.598842	0.504695	0.621963
TCGA-62-A46O-01A-11R-A24H-07	0.405247	0.659336	0.568252	0.526768	0.7152	0.730871	0.326361	0.662461	0.370655	0.770481	0.654598	0.340824	0.362961	0.714311	0.399639	0.615125	0.310823	0.705115	0.486162	0.47198	0.527009	0.417763	0.683148
TCGA-93-A4JO-01A-21R-A24X-07	0.65712	0.72274	0.843527	0.671964	0.737492	0.76204	0.458443	0.690331	0.658973	0.832184	0.930119	0.587004	0.67469	0.829339	0.512739	0.764248	0.359136	0.75039	0.801218	0.670815	0.638902	0.469686	0.643829
TCGA-44-2666-01A-01R-0946-07	0.472731	0.638796	0.694205	0.602192	0.746843	0.736983	0.421504	0.723607	0.546097	0.817961	0.780946	0.565098	0.710353	0.797913	0.504196	0.702577	0.347272	0.726027	0.69144	0.613552	0.617549	0.452244	0.68217
TCGA-67-3774-01A-01R-0946-07	0.600701	0.689003	0.805809	0.693608	0.754007	0.811415	0.517147	0.744217	0.615425	0.814845	0.876841	0.596977	0.68205	0.823943	0.564452	0.741095	0.483889	0.755213	0.752786	0.683563	0.668108	0.474108	0.676983
TCGA-86-8358-01A-11R-2326-07	0.42667	0.754133	0.727347	0.569157	0.683277	0.769484	0.369355	0.732002	0.510227	0.751529	0.767142	0.453084	0.363865	0.769672	0.521902	0.751109	0.19645	0.702041	0.73343	0.592428	0.580657	0.4899	0.654804
TCGA-62-8394-01A-11R-2326-07	0.472191	0.738578	0.727283	0.611296	0.739815	0.769796	0.349181	0.746226	0.530104	0.79582	0.829477	0.540632	0.556851	0.823871	0.512703	0.744395	0.338891	0.765996	0.726468	0.625362	0.659575	0.483503	0.686512
TCGA-MP-A4T6-01A-32R-A262-07	0.526144	0.58622	0.764201	0.605902	0.725049	0.799422	0.366964	0.655397	0.56038	0.732983	0.816547	0.539244	0.495841	0.816488	0.415988	0.672018	0.370544	0.724452	0.666859	0.614229	0.594273	0.503993	0.576616
TCGA-55-8514-01A-11R-2403-07	0.464471	0.570367	0.695202	0.622618	0.71289	0.83865	0.390179	0.672547	0.534734	0.794952	0.836564	0.552763	0.57349	0.842505	0.458476	0.703401	0.327071	0.739358	0.707127	0.62156	0.598877	0.499423	0.583623
TCGA-44-6147-01A-11R-A278-07	0.571185	0.64729	0.665817	0.561799	0.690378	0.687847	0.445395	0.643235	0.623868	0.76084	0.817623	0.47887	0.571843	0.784849	0.35841	0.696477	0.323991	0.715554	0.711281	0.622995	0.60743	0.429159	0.6063
TCGA-64-1681-01A-11R-2066-07	0.58821	0.687753	0.722121	0.686873	0.748096	0.751463	0.482038	0.733026	0.599069	0.835482	0.852605	0.568995	0.623613	0.856284	0.532363	0.759784	0.381286	0.769227	0.747823	0.675552	0.641827	0.553872	0.652957
TCGA-50-5944-01A-11R-1755-07	0.449059	0.592397	0.696493	0.668424	0.735552	0.735434	0.441747	0.742326	0.51985	0.828978	0.824988	0.586417	0.640956	0.81821	0.502395	0.775577	0.380729	0.740241	0.725933	0.687884	0.62195	0.475341	0.66996
TCGA-44-A47B-01A-11R-A24H-07	0.392959	0.72447	0.790897	0.614122	0.752679	0.825831	0.410274	0.700977	0.518369	0.780423	0.849697	0.517954	0.57523	0.79856	0.550013	0.73757	0.231517	0.741675	0.738544	0.623761	0.606768	0.46366	0.632095
TCGA-L4-A4E6-01A-11R-A24H-07	0.583513	0.637096	0.790876	0.71292	0.767702	0.725472	0.548643	0.795124	0.638754	0.847146	0.974475	0.715712	0.758599	0.881162	0.61486	0.762583	0.382294	0.78092	0.835721	0.717095	0.69096	0.505911	0.63051
TCGA-49-AARR-01A-11R-A41B-07	0.670531	0.590166	0.782218	0.657735	0.754684	0.736132	0.536985	0.728426	0.624627	0.85382	0.88428	0.617723	0.63605	0.817929	0.535968	0.783591	0.39018	0.81002	0.755232	0.666604	0.651907	0.497769	0.636769
TCGA-49-4507-01A-01R-1206-07	0.546319	0.803698	0.891274	0.650455	0.792171	0.779006	0.375714	0.722919	0.570713	0.713868	0.889908	0.603639	0.547466	0.802999	0.641863	0.75061	0.503909	0.7273	0.725838	0.680476	0.650189	0.489606	0.693325
TCGA-75-7027-01A-11R-1949-07	0.449326	0.722511	0.708873	0.609176	0.736673	0.775094	0.371639	0.703812	0.513355	0.763779	0.787496	0.544347	0.515018	0.793622	0.507084	0.708214	0.376032	0.747918	0.675814	0.616528	0.61126	0.486606	0.694517
TCGA-38-4625-01A-01R-1206-07	0.584957	0.787719	0.796643	0.649295	0.729072	0.763129	0.443384	0.753672	0.658279	0.77733	0.874057	0.658893	0.62829	0.852715	0.561068	0.727886	0.4625	0.792587	0.803929	0.641648	0.644676	0.443939	0.659458
TCGA-44-8120-01A-11R-2241-07	0.54103	0.627395	0.727204	0.645438	0.727636	0.761751	0.44825	0.70201	0.598004	0.791582	0.82979	0.573224	0.691963	0.830141	0.529739	0.76666	0.386475	0.746611	0.75592	0.657058	0.647801	0.492456	0.665534
TCGA-44-6776-01A-11R-1858-07	0.495555	0.589444	0.721781	0.603466	0.717314	0.753525	0.455119	0.736701	0.488309	0.78036	0.735814	0.488987	0.585205	0.796618	0.478034	0.692619	0.344512	0.687923	0.635764	0.629113	0.602374	0.427656	0.65146
TCGA-62-8402-01A-11R-2326-07	0.48048	0.762676	0.852677	0.655818	0.73675	0.79269	0.364196	0.712531	0.586669	0.780101	0.863652	0.546402	0.444565	0.806193	0.517298	0.779901	0.446835	0.755182	0.734522	0.673314	0.642735	0.557035	0.695065
TCGA-75-5125-01A-01R-1755-07	0.554258	0.780915	0.820012	0.68983	0.749894	0.77275	0.426915	0.749764	0.627009	0.812187	0.927721	0.589808	0.606474	0.850756	0.586532	0.758043	0.473637	0.784837	0.827695	0.702844	0.639365	0.535374	0.649112
TCGA-64-1678-01A-01R-0946-07	0.452586	0.703591	0.752707	0.543067	0.672253	0.780381	0.273367	0.660549	0.456019	0.742551	0.705878	0.402323	0.340391	0.78866	0.538661	0.658158	0.209054	0.676148	0.559814	0.498449	0.504541	0.43119	0.644163
TCGA-50-5066-02A-11R-2090-07	0.50007	0.717505	0.734111	0.593257	0.736154	0.788082	0.386111	0.702017	0.577423	0.836058	0.839747	0.517283	0.546073	0.802722	0.509435	0.736305	0.324239	0.749504	0.724383	0.656445	0.612372	0.383593	0.678506
TCGA-97-7554-01A-11R-2039-07	0.623269	0.721566	0.746958	0.649485	0.740902	0.737291	0.450447	0.756914	0.632076	0.793898	0.869357	0.589771	0.602447	0.801964	0.533534	0.758792	0.384716	0.737947	0.798072	0.684887	0.655205	0.528621	0.676538
TCGA-78-7167-01A-11R-2066-07	0.417686	0.452794	0.676889	0.592455	0.673084	0.795526	0.344133	0.641631	0.419812	0.760744	0.723922	0.470074	0.499396	0.784468	0.469808	0.692001	0.30143	0.713515	0.573991	0.602339	0.577159	0.409456	0.571762
TCGA-50-6595-01A-12R-1858-07	0.464952	0.757434	0.798657	0.6812	0.769034	0.771493	0.444193	0.780662	0.600602	0.790656	0.88319	0.604551	0.585588	0.818719	0.637899	0.770989	0.474532	0.761474	0.850846	0.71181	0.679049	0.494313	0.69975
TCGA-64-1677-01A-01R-0946-07	0.630929	0.804544	0.841805	0.61243	0.769751	0.754431	0.397104	0.716257	0.622804	0.772362	0.837096	0.534414	0.518211	0.78703	0.530216	0.73018	0.318387	0.70495	0.689739	0.581463	0.607086	0.475438	0.68857
TCGA-97-A4M6-01A-11R-A24X-07	0.668424	0.691007	0.829701	0.71865	0.789282	0.802643	0.428854	0.728069	0.668537	0.811412	0.912677	0.631908	0.626336	0.861979	0.524575	0.778157	0.477336	0.776223	0.783811	0.675145	0.674673	0.516157	0.652513
TCGA-97-8547-01A-11R-2403-07	0.316237	0.60195	0.678351	0.631914	0.741062	0.786457	0.296108	0.727803	0.422081	0.764588	0.887089	0.57221	0.605198	0.850265	0.496209	0.744487	0.319714	0.772456	0.802749	0.688725	0.6245	0.500859	0.635065
TCGA-62-A470-01A-11R-A24H-07	0.374283	0.658669	0.682499	0.609555	0.715971	0.790022	0.472136	0.728089	0.467638	0.789087	0.80297	0.516266	0.531697	0.791648	0.430039	0.696846	0.338637	0.73748	0.695837	0.620528	0.553427	0.48615	0.622913
TCGA-62-8395-01A-11R-2326-07	0.528852	0.563495	0.72976	0.627988	0.724586	0.786374	0.449458	0.703188	0.5471	0.803313	0.805842	0.550385	0.609351	0.818571	0.512164	0.727695	0.366464	0.736853	0.713529	0.655682	0.637914	0.466629	0.60894
TCGA-55-7727-01A-11R-2170-07	0.645357	0.783292	0.787365	0.671031	0.754095	0.727681	0.431232	0.713904	0.689542	0.811288	0.825034	0.523269	0.650716	0.790427	0.504472	0.719354	0.286643	0.73611	0.749137	0.599021	0.631422	0.465834	0.732011
TCGA-73-4675-01A-01R-1206-07	0.478819	0.597478	0.67381	0.653612	0.708616	0.832314	0.364012	0.704703	0.49077	0.782983	0.825386	0.598069	0.5882	0.832908	0.471717	0.716088	0.347073	0.748412	0.734469	0.631999	0.622898	0.470866	0.604855
TCGA-44-2668-01A-01R-0946-07	0.549501	0.834949	0.827862	0.70081	0.780875	0.786393	0.403833	0.778092	0.636754	0.815627	0.936886	0.653948	0.614985	0.827245	0.643166	0.783623	0.607813	0.828612	0.857153	0.705924	0.702947	0.559414	0.692637
TCGA-38-4628-01A-01R-1206-07	0.383128	0.622447	0.674226	0.665843	0.763973	0.796544	0.358683	0.78115	0.519529	0.851657	0.849053	0.622163	0.634862	0.861682	0.515953	0.727883	0.421096	0.772752	0.747692	0.656936	0.655554	0.533481	0.644672
TCGA-O1-A52J-01A-11R-A262-07	0.364981	0.621283	0.723082	0.655836	0.73342	0.751737	0.412884	0.717791	0.470879	0.838622	0.931063	0.612765	0.640062	0.870982	0.500136	0.723618	0.357667	0.781467	0.776191	0.671822	0.635972	0.48149	0.576155
TCGA-05-4396-01A-21R-1858-07	0.411311	0.61619	0.680705	0.621002	0.725614	0.815295	0.379721	0.673609	0.468626	0.76698	0.748688	0.438962	0.495517	0.789522	0.508979	0.719188	0.453373	0.737635	0.643767	0.627485	0.636896	0.503244	0.692752
TCGA-44-7660-01A-11R-2066-07	0.450278	0.703162	0.715833	0.580674	0.728344	0.773412	0.310557	0.666697	0.525033	0.767546	0.808119	0.470659	0.352921	0.794097	0.492436	0.688222	0.226342	0.709825	0.656285	0.596238	0.58157	0.441883	0.615069
TCGA-86-8279-01A-11R-2287-07	0.342289	0.588401	0.632685	0.584261	0.728598	0.823055	0.335831	0.726646	0.437367	0.802157	0.81211	0.488623	0.542882	0.796352	0.494144	0.737781	0.316869	0.725729	0.71326	0.605481	0.546141	0.453738	0.641723
TCGA-97-7937-01A-11R-2170-07	0.344608	0.592022	0.634251	0.579829	0.734121	0.832599	0.332568	0.667154	0.489229	0.798522	0.781274	0.474521	0.499534	0.774566	0.417813	0.693506	0.260443	0.693178	0.681395	0.591402	0.544835	0.451675	0.62781
TCGA-05-5420-01A-01R-1628-07	0.734688	0.820943	0.909993	0.71467	0.777042	0.760942	0.475658	0.784386	0.760973	0.810377	0.955753	0.728603	0.701415	0.864864	0.591804	0.745722	0.571436	0.772515	0.827736	0.679971	0.704715	0.560339	0.719874
TCGA-78-7542-01A-21R-2066-07	0.459241	0.716141	0.771342	0.646623	0.766097	0.762607	0.330621	0.732363	0.557414	0.793305	0.805626	0.476112	0.419111	0.806609	0.566522	0.712572	0.371795	0.742196	0.68798	0.615566	0.607029	0.478298	0.670589
TCGA-67-3771-01A-01R-0946-07	0.59203	0.746749	0.781867	0.67039	0.745255	0.826807	0.358319	0.722245	0.636096	0.824017	0.899049	0.565942	0.530144	0.812501	0.490093	0.744781	0.318225	0.793901	0.816813	0.643606	0.631098	0.492128	0.598742
TCGA-38-7271-01A-11R-2039-07	0.854135	0.784827	0.903165	0.722634	0.768748	0.764504	0.573289	0.7742	0.848666	0.812786	0.950779	0.697375	0.730168	0.880641	0.591713	0.799295	0.456225	0.767949	0.861612	0.763747	0.726944	0.57252	0.729625
TCGA-78-7163-01A-12R-2066-07	0.439848	0.532147	0.770887	0.567386	0.708956	0.762047	0.28489	0.630582	0.446013	0.789628	0.735045	0.394024	0.416493	0.783654	0.46921	0.638616	0.251752	0.667033	0.551616	0.493128	0.572852	0.490787	0.590595
TCGA-73-4658-01A-01R-1755-07	0.572422	0.749934	0.818074	0.733631	0.768905	0.820703	0.542555	0.763877	0.650727	0.834232	0.93729	0.675253	0.726994	0.868639	0.559321	0.803453	0.521084	0.761965	0.871418	0.732293	0.708353	0.557083	0.66285
TCGA-97-8171-01A-11R-2287-07	0.321137	0.538018	0.588742	0.532824	0.653779	0.752832	0.312343	0.693587	0.403232	0.737928	0.721873	0.426484	0.405394	0.7793	0.392663	0.647999	0.143811	0.702742	0.562587	0.543737	0.506374	0.402797	0.561603
TCGA-44-6148-01A-11R-1755-07	0.596361	0.531578	0.705873	0.648142	0.749391	0.706902	0.54693	0.699836	0.587857	0.824754	0.8552	0.583659	0.666482	0.814824	0.509797	0.762868	0.40553	0.805379	0.71924	0.649606	0.626171	0.501017	0.634611
TCGA-MP-A4T7-01A-11R-A24X-07	0.501495	0.708446	0.754396	0.638139	0.751786	0.802956	0.461489	0.721699	0.550039	0.80598	0.867148	0.62155	0.595937	0.824944	0.526038	0.712402	0.481447	0.7364	0.734992	0.64709	0.638778	0.509615	0.701134
TCGA-49-4514-01A-21R-1858-07	0.641284	0.75968	0.829999	0.652809	0.744069	0.805041	0.402344	0.728162	0.588525	0.7519	0.821114	0.537543	0.520889	0.838613	0.547754	0.717287	0.43993	0.747327	0.644862	0.610913	0.659758	0.521765	0.706577
TCGA-50-5946-01A-11R-1755-07	0.233847	0.67779	0.645207	0.496354	0.705232	0.778334	0.265365	0.665724	0.365018	0.746138	0.688411	0.355096	0.470211	0.746223	0.38271	0.711118	0.201895	0.700728	0.610489	0.57743	0.526098	0.494735	0.670496
TCGA-55-8621-01A-11R-2403-07	0.606023	0.687897	0.817113	0.692571	0.770008	0.767639	0.488071	0.782585	0.681213	0.885262	0.950589	0.650274	0.709874	0.842007	0.61387	0.787512	0.498429	0.788967	0.843129	0.711764	0.686007	0.494069	0.669362
TCGA-55-8614-01A-11R-2403-07	0.497605	0.684918	0.713826	0.635096	0.789613	0.746541	0.474137	0.693136	0.534682	0.821283	0.800498	0.517035	0.580969	0.815848	0.538849	0.73962	0.397105	0.738585	0.720816	0.637712	0.604703	0.467892	0.659715
TCGA-71-8520-01A-11R-2403-07	0.372074	0.66215	0.669541	0.638538	0.747321	0.787796	0.37312	0.701605	0.463444	0.788848	0.798599	0.531527	0.589279	0.823375	0.449902	0.736574	0.324229	0.722881	0.723763	0.611667	0.639553	0.532693	0.697451
TCGA-69-7978-01A-11R-2187-07	0.639918	0.785976	0.856762	0.693041	0.759934	0.818302	0.412982	0.751903	0.718628	0.814586	0.9716	0.635384	0.651523	0.833023	0.665284	0.784839	0.407924	0.784436	0.905175	0.714954	0.716993	0.560836	0.66814
TCGA-L9-A443-01A-12R-A24H-07	0.42992	0.656865	0.77006	0.612306	0.721872	0.798454	0.393585	0.659193	0.470177	0.800932	0.842017	0.526161	0.530628	0.802705	0.513729	0.730672	0.380498	0.747963	0.629952	0.605856	0.644121	0.500892	0.599915
TCGA-55-7573-01A-11R-2039-07	0.705324	0.631993	0.773602	0.694193	0.754122	0.730879	0.492945	0.70734	0.678964	0.826862	0.860085	0.546554	0.611343	0.824897	0.50787	0.784848	0.359459	0.752621	0.759241	0.666754	0.649134	0.525639	0.634602
TCGA-78-7154-01A-11R-2039-07	0.430637	0.763389	0.745281	0.607453	0.723255	0.797372	0.411623	0.696392	0.495635	0.827197	0.757014	0.514949	0.557251	0.82111	0.543091	0.691043	0.295621	0.718387	0.674452	0.607029	0.620791	0.527607	0.685464
TCGA-44-3918-01B-02R-A277-07	0.278751	0.646322	0.623967	0.527181	0.578779	0.642354	0.419758	0.564625	0.512575	0.658303	0.765837	0.304974	0.447595	0.601844	0.354741	0.643851	0.155346	0.602484	0.670069	0.518281	0.510805	0.38868	0.541045
TCGA-S2-AA1A-01A-12R-A39D-07	0.780105	0.666007	0.855305	0.644521	0.743695	0.762407	0.53055	0.697208	0.755503	0.765938	0.912057	0.598354	0.647198	0.834827	0.543713	0.752854	0.322761	0.755189	0.768231	0.684882	0.697044	0.58246	0.664062
TCGA-05-5423-01A-01R-1628-07	0.607403	0.719051	0.836165	0.721903	0.761011	0.732513	0.530881	0.762159	0.650229	0.868375	0.912988	0.665396	0.733093	0.871057	0.544371	0.749665	0.466168	0.750017	0.81089	0.72399	0.679741	0.551808	0.691864
TCGA-50-6591-01A-11R-1755-07	0.0532303	0.569192	0.470695	0.517096	0.686818	0.680674	0.336522	0.657089	0.212047	0.685034	0.607736	0.371654	0.301082	0.756403	0.38186	0.658877	0.0184022	0.695645	0.557765	0.554244	0.541525	0.321116	0.701461
TCGA-49-4505-01A-01R-1206-07	0.60949	0.676656	0.817429	0.684971	0.802448	0.810415	0.510635	0.75798	0.633721	0.829476	0.912021	0.636171	0.705451	0.861266	0.583741	0.766021	0.47392	0.76672	0.798775	0.68974	0.663594	0.507209	0.635618
TCGA-97-8552-01A-11R-2403-07	0.616918	0.581597	0.754784	0.684692	0.723212	0.752191	0.480916	0.736263	0.611669	0.840107	0.903836	0.627044	0.649899	0.853967	0.492567	0.766254	0.487204	0.779181	0.739857	0.693811	0.63471	0.504864	0.586644
TCGA-MP-A4TJ-01A-51R-A262-07	0.749605	0.793771	0.895693	0.682785	0.749069	0.814605	0.523917	0.725381	0.760447	0.853795	0.941875	0.626598	0.670538	0.842003	0.586144	0.770017	0.519428	0.793216	0.822955	0.70758	0.682864	0.535033	0.690196
TCGA-73-4670-01A-01R-1206-07	0.455084	0.723484	0.67358	0.658337	0.751426	0.817849	0.366212	0.71663	0.510252	0.770191	0.828449	0.554665	0.558789	0.786512	0.502351	0.70021	0.584662	0.721203	0.723746	0.615042	0.623578	0.467489	0.639803
TCGA-55-A493-01A-11R-A24H-07	0.630683	0.811899	0.842705	0.673969	0.743422	0.795998	0.386362	0.752534	0.657533	0.762073	0.94077	0.594486	0.533132	0.830817	0.58702	0.744382	0.301037	0.762899	0.858897	0.701042	0.670104	0.466045	0.631842
TCGA-49-6745-01A-11R-1858-07	0.55459	0.760673	0.817134	0.704338	0.763643	0.787215	0.482616	0.766594	0.602195	0.842097	0.913332	0.637694	0.700267	0.839283	0.630998	0.785273	0.451283	0.740225	0.845647	0.681713	0.705498	0.500654	0.715331
TCGA-38-4631-01A-01R-1755-07	0.490689	0.757408	0.768136	0.617437	0.722383	0.798909	0.318409	0.736963	0.564633	0.779397	0.812588	0.569939	0.512785	0.824828	0.476547	0.713514	0.539135	0.776889	0.669975	0.595496	0.612733	0.491156	0.625556
TCGA-38-4626-01A-01R-1206-07	0.470612	0.694443	0.740035	0.682348	0.763345	0.73327	0.537433	0.796408	0.545613	0.880076	0.946396	0.734252	0.750734	0.865425	0.636588	0.786707	0.604071	0.838722	0.826144	0.707264	0.67779	0.529317	0.687518
TCGA-44-6147-01B-06R-A277-07	0.492571	0.634701	0.546943	0.501066	0.577004	0.493061	0.497506	0.485738	0.669139	0.64997	0.64016	0.328276	0.470786	0.628325	0.302434	0.616959	0.134227	0.612452	0.567121	0.467931	0.485258	0.288591	0.596632
TCGA-55-7227-01A-11R-2039-07	0.529215	0.727661	0.817687	0.688198	0.746429	0.774431	0.426809	0.712453	0.598503	0.815676	0.907112	0.608006	0.632015	0.833343	0.552421	0.790015	0.359922	0.704085	0.82587	0.706604	0.657508	0.52014	0.676113
TCGA-55-A57B-01A-12R-A39D-07	0.418142	0.654449	0.727426	0.661323	0.716239	0.754197	0.463781	0.707464	0.4693	0.823489	0.851874	0.549187	0.599828	0.83624	0.499124	0.766642	0.386798	0.753752	0.732184	0.676789	0.625334	0.518802	0.629368
TCGA-69-7979-01A-11R-2187-07	0.363713	0.615553	0.665417	0.617047	0.717302	0.791963	0.336807	0.71003	0.448938	0.779337	0.79155	0.494278	0.540486	0.784616	0.510922	0.708968	0.323973	0.71513	0.700792	0.60118	0.581181	0.444769	0.640463
TCGA-44-A4SS-01A-11R-A24X-07	0.544972	0.767092	0.845349	0.606147	0.741518	0.767144	0.45425	0.7552	0.60657	0.78822	0.905958	0.641362	0.595546	0.828321	0.622724	0.744811	0.338878	0.79425	0.846687	0.643451	0.667714	0.522803	0.681925
TCGA-05-4424-01A-22R-1858-07	0.526853	0.754283	0.75731	0.675522	0.748611	0.786888	0.490111	0.752473	0.592138	0.869856	0.889817	0.634534	0.68357	0.859909	0.537454	0.76892	0.436306	0.791207	0.81729	0.655107	0.660726	0.477969	0.679279
TCGA-MN-A4N5-01A-11R-A24X-07	0.511295	0.701009	0.817155	0.631286	0.764711	0.794555	0.365268	0.691033	0.539605	0.787263	0.861584	0.520036	0.519383	0.816504	0.532757	0.722907	0.348765	0.738301	0.682463	0.642281	0.644117	0.51981	0.630316
TCGA-99-8028-01A-11R-2241-07	0.702189	0.770958	0.898303	0.688941	0.786038	0.815982	0.502973	0.745126	0.74611	0.823855	0.985229	0.671377	0.680038	0.853386	0.625654	0.794675	0.375734	0.778825	0.86803	0.732279	0.725356	0.556108	0.723211
TCGA-75-5146-01A-01R-1628-07	0.662218	0.698333	0.805692	0.682331	0.735116	0.70733	0.49534	0.727056	0.661771	0.816409	0.832936	0.558337	0.604758	0.826023	0.509456	0.721995	0.451964	0.742276	0.714038	0.674969	0.675493	0.474755	0.700245
TCGA-55-1596-01A-01R-0946-07	0.473976	0.734148	0.755163	0.618499	0.757942	0.78877	0.378585	0.707441	0.52301	0.788238	0.783408	0.527889	0.536366	0.836286	0.493366	0.662365	0.387461	0.747745	0.676674	0.577945	0.597786	0.48127	0.657806
TCGA-55-7910-01A-11R-2170-07	0.490395	0.733462	0.67482	0.531406	0.690199	0.811702	0.465955	0.651477	0.525076	0.86651	0.804539	0.459148	0.512683	0.801119	0.443294	0.68905	0.388219	0.732853	0.629866	0.527627	0.562768	0.480611	0.673496
TCGA-80-5611-01A-01R-1628-07	0.480436	0.741696	0.772476	0.651308	0.759604	0.776163	0.359184	0.769471	0.600337	0.810632	0.927026	0.621784	0.599685	0.83023	0.527534	0.756321	0.412546	0.797136	0.808118	0.644496	0.635816	0.472915	0.65136
TCGA-91-6828-01A-11R-1858-07	0.569483	0.762624	0.811453	0.690643	0.752043	0.847037	0.488339	0.733229	0.643142	0.822178	0.921549	0.593164	0.695548	0.839017	0.58499	0.78835	0.524425	0.798637	0.832879	0.663202	0.658098	0.532094	0.715026
TCGA-69-7761-01A-11R-2170-07	0.667281	0.812076	0.83096	0.663398	0.741384	0.800437	0.477973	0.719925	0.727251	0.776477	0.905259	0.584055	0.551527	0.809053	0.56004	0.766068	0.485433	0.786421	0.813783	0.700671	0.697571	0.590626	0.696044
TCGA-91-6849-01A-11R-1949-07	0.68711	0.671446	0.794443	0.677762	0.696823	0.757428	0.539724	0.740884	0.686273	0.79267	0.889166	0.598441	0.606577	0.826141	0.51707	0.731509	0.474042	0.75118	0.763076	0.651513	0.646649	0.464135	0.636115
TCGA-MP-A4TH-01A-31R-A262-07	0.796726	0.653271	0.836144	0.671348	0.718353	0.818269	0.470895	0.695288	0.766581	0.766053	0.885543	0.559661	0.575328	0.834095	0.545683	0.757003	0.339123	0.715201	0.766831	0.698099	0.67382	0.553703	0.64182
TCGA-44-7669-01A-21R-2066-07	0.539349	0.789305	0.766334	0.629919	0.724349	0.773401	0.483215	0.750692	0.618903	0.849547	0.868377	0.59515	0.642536	0.786105	0.502407	0.767436	0.402351	0.763643	0.772646	0.668269	0.605471	0.476302	0.702858
TCGA-44-2662-01A-01R-A278-07	0.375555	0.744503	0.677172	0.628286	0.665971	0.733407	0.349224	0.758904	0.558088	0.842128	0.912807	0.569454	0.485635	0.821242	0.463885	0.708872	0.459897	0.729715	0.837372	0.646028	0.609595	0.528012	0.641306
TCGA-73-7499-01A-11R-2187-07	0.62578	0.765265	0.879069	0.644757	0.779171	0.779158	0.374144	0.742902	0.642763	0.771913	0.904331	0.586869	0.536114	0.80519	0.518493	0.773999	0.398969	0.746502	0.772368	0.642835	0.679072	0.488398	0.661264
TCGA-55-8505-01A-11R-2403-07	0.450864	0.62714	0.634221	0.615702	0.742945	0.807892	0.33976	0.704782	0.50566	0.770067	0.779982	0.550127	0.480449	0.82492	0.544186	0.710165	0.442755	0.75326	0.711151	0.574805	0.617477	0.475286	0.662587
TCGA-86-8671-01A-11R-2403-07	0.802218	0.744924	0.905438	0.68757	0.787768	0.783386	0.425415	0.739975	0.791078	0.816339	0.968867	0.673352	0.662891	0.884838	0.617794	0.809481	0.413858	0.791416	0.871965	0.759119	0.736705	0.549957	0.671878
TCGA-95-7948-01A-11R-2187-07	0.436639	0.562309	0.686607	0.603164	0.723249	0.684024	0.412281	0.686101	0.518203	0.745669	0.776618	0.488312	0.543689	0.802518	0.413228	0.715947	0.274037	0.689422	0.588802	0.569214	0.582737	0.414018	0.543887
TCGA-95-7043-01A-11R-1949-07	0.429831	0.634624	0.701135	0.515838	0.636509	0.701055	0.369758	0.640384	0.431891	0.774193	0.714944	0.527464	0.413079	0.781037	0.432771	0.688009	0.246034	0.689158	0.56257	0.542921	0.579704	0.439869	0.60912
TCGA-50-5044-01A-21R-1858-07	0.467399	0.722418	0.809971	0.677023	0.754	0.73249	0.434689	0.758276	0.524796	0.771007	0.859194	0.628256	0.576132	0.811651	0.623616	0.758852	0.328757	0.744412	0.755728	0.677792	0.646184	0.492283	0.67354
TCGA-J2-A4AG-01A-11R-A24H-07	0.697735	0.738558	0.826223	0.71144	0.751186	0.819487	0.520789	0.72424	0.695058	0.803139	0.886092	0.587432	0.689791	0.845861	0.560858	0.749789	0.3962	0.748929	0.794002	0.675188	0.665679	0.550842	0.697703
TCGA-86-7955-01A-11R-2187-07	0.38644	0.632106	0.683821	0.511048	0.686377	0.771347	0.285292	0.672662	0.429083	0.722302	0.680042	0.384553	0.386994	0.752148	0.453573	0.620051	0.270013	0.697246	0.531152	0.455759	0.498835	0.476654	0.614542
TCGA-62-A472-01A-11R-A24H-07	0.48508	0.734998	0.795993	0.635221	0.751524	0.828059	0.370731	0.740045	0.548938	0.822668	0.873981	0.553173	0.600028	0.816052	0.490062	0.731576	0.375759	0.712795	0.755859	0.651877	0.61973	0.484775	0.66779
TCGA-44-6146-01A-11R-1755-07	0.401142	0.596914	0.688352	0.594729	0.699644	0.784066	0.438814	0.666751	0.427607	0.786138	0.740967	0.48388	0.529058	0.784612	0.517395	0.724444	0.448669	0.732536	0.59509	0.628493	0.600721	0.569234	0.665313
TCGA-MP-A4SV-01A-11R-A24X-07	0.575062	0.78352	0.835223	0.644715	0.739463	0.836297	0.426879	0.694	0.646017	0.796135	0.892741	0.548166	0.539344	0.814294	0.543643	0.738389	0.29513	0.742129	0.767049	0.635296	0.652772	0.463403	0.656041
TCGA-49-AARN-01A-21R-A41B-07	0.630598	0.63315	0.744777	0.634375	0.762652	0.813246	0.403437	0.677156	0.613216	0.791064	0.845655	0.526587	0.486507	0.817641	0.504065	0.748163	0.40309	0.734242	0.668117	0.635067	0.640368	0.501062	0.686853
TCGA-50-5072-01A-21R-1858-07	0.451581	0.758391	0.693992	0.617055	0.756221	0.793096	0.38919	0.751201	0.489246	0.78223	0.808064	0.578233	0.613616	0.812146	0.569691	0.707582	0.521513	0.771791	0.723475	0.613326	0.655333	0.504225	0.727502
TCGA-55-5899-01A-11R-1628-07	0.461075	0.739261	0.804877	0.617177	0.735892	0.837658	0.386065	0.741779	0.516787	0.749956	0.842706	0.522246	0.577238	0.854974	0.562482	0.743217	0.249658	0.761241	0.772996	0.624906	0.626365	0.575061	0.6437
TCGA-97-A4LX-01A-11R-A24X-07	0.747575	0.747053	0.863011	0.689152	0.765915	0.79213	0.463709	0.764821	0.748961	0.806318	0.947111	0.645281	0.639641	0.850143	0.582908	0.782113	0.382995	0.765688	0.869931	0.726185	0.711079	0.534081	0.632023
TCGA-L9-A444-01A-21R-A24H-07	0.67252	0.708	0.905684	0.646504	0.746718	0.799993	0.404674	0.721618	0.701023	0.768629	0.942006	0.594715	0.563892	0.818832	0.585325	0.751407	0.285999	0.746143	0.767468	0.676865	0.674034	0.500846	0.648952
TCGA-55-8615-01A-11R-2403-07	0.347498	0.588456	0.635385	0.602089	0.689628	0.833152	0.325455	0.701031	0.384436	0.783759	0.789804	0.463759	0.478031	0.818457	0.47503	0.705463	0.374945	0.762626	0.682122	0.592299	0.603158	0.503764	0.657775
TCGA-50-7109-01A-11R-2039-07	0.545357	0.717696	0.824854	0.634438	0.710186	0.824515	0.37455	0.659828	0.618647	0.779452	0.842708	0.523724	0.538341	0.818168	0.514591	0.741733	0.393257	0.776377	0.700663	0.612985	0.625851	0.492491	0.703149
TCGA-91-7771-01A-11R-2170-07	0.645957	0.730877	0.837295	0.661589	0.7565	0.77167	0.488021	0.749401	0.665675	0.795013	0.9124	0.606268	0.682048	0.825692	0.557892	0.76448	0.380462	0.766185	0.803447	0.678979	0.676806	0.501522	0.703265
TCGA-97-A4M1-01A-11R-A24X-07	0.422412	0.517484	0.747633	0.673376	0.745577	0.762045	0.44354	0.7441	0.485606	0.832662	0.866508	0.630516	0.696455	0.834367	0.537037	0.747982	0.387943	0.767129	0.731532	0.651608	0.630628	0.445431	0.600528
TCGA-44-5644-01A-21R-2039-07	0.333825	0.633703	0.659997	0.5383	0.675024	0.830225	0.388296	0.673712	0.373581	0.714966	0.727062	0.368744	0.400111	0.767133	0.421751	0.677454	0.434602	0.705441	0.591389	0.543361	0.518793	0.533356	0.606252
TCGA-78-7536-01A-11R-2066-07	0.40079	0.776652	0.768484	0.620922	0.73667	0.817279	0.368661	0.697615	0.525249	0.885553	0.86674	0.523739	0.508218	0.785531	0.466126	0.741936	0.338682	0.731127	0.746179	0.559154	0.594045	0.451937	0.64703
TCGA-MP-A4TI-01A-21R-A24X-07	0.636836	0.828223	0.891513	0.729651	0.796724	0.782893	0.476665	0.781722	0.69391	0.8059	0.982064	0.694015	0.646736	0.847989	0.644873	0.80442	0.452921	0.767358	0.908992	0.716566	0.721269	0.502212	0.693772
TCGA-05-4403-01A-01R-1206-07	0.544365	0.657533	0.778927	0.705029	0.754466	0.823758	0.466729	0.781016	0.610183	0.831683	0.896591	0.65604	0.652284	0.849533	0.547289	0.773798	0.514962	0.81213	0.810042	0.72589	0.671325	0.556882	0.682118
TCGA-44-2666-01B-02R-A277-07	0.249368	0.427286	0.370406	0.401441	0.565169	0.592701	0.311475	0.454173	0.393278	0.669031	0.481945	0.227379	0.457284	0.595619	0.238906	0.559158	0.0135101	0.596703	0.492567	0.388759	0.37979	0.203244	0.578713
TCGA-99-7458-01A-11R-2039-07	0.590725	0.732527	0.842509	0.695135	0.760624	0.780322	0.474284	0.734458	0.648179	0.830392	0.906021	0.604159	0.687549	0.842129	0.561397	0.783114	0.383015	0.738032	0.815417	0.707426	0.695689	0.530834	0.682662
TCGA-64-5778-01A-01R-1628-07	0.690744	0.778192	0.90001	0.657255	0.754805	0.731705	0.444309	0.718192	0.685848	0.781714	0.89489	0.575615	0.557268	0.806256	0.532955	0.72619	0.369207	0.738485	0.728969	0.701033	0.656326	0.522391	0.700232
TCGA-78-7145-01A-11R-2039-07	0.416902	0.714595	0.687837	0.666706	0.757223	0.858246	0.439018	0.736254	0.494101	0.830723	0.838276	0.614377	0.660678	0.837865	0.487754	0.737179	0.35798	0.749753	0.75902	0.659643	0.624007	0.50359	0.683197
TCGA-NJ-A4YP-01A-11R-A262-07	0.457734	0.704504	0.782702	0.621963	0.734018	0.837813	0.307095	0.719886	0.500359	0.74215	0.846915	0.557382	0.541816	0.779507	0.554672	0.748467	0.373218	0.739091	0.708589	0.60984	0.648116	0.454934	0.665879
TCGA-55-7283-01A-11R-2039-07	0.452347	0.694106	0.793768	0.658873	0.772132	0.781029	0.483853	0.746748	0.505185	0.812072	0.84822	0.586009	0.661655	0.826736	0.538121	0.758674	0.455025	0.738425	0.740753	0.681191	0.643307	0.488576	0.6915
TCGA-55-8208-01A-11R-2241-07	0.753641	0.786697	0.86556	0.695913	0.782783	0.770467	0.431059	0.756842	0.758784	0.83667	0.965891	0.698622	0.635342	0.862468	0.591386	0.788973	0.505717	0.781822	0.863026	0.737923	0.709433	0.534152	0.674098
TCGA-78-7537-01A-11R-2066-07	0.527849	0.570289	0.738445	0.606066	0.745704	0.768125	0.407944	0.69833	0.520082	0.747652	0.785105	0.55335	0.5339	0.797678	0.498225	0.725659	0.287929	0.724757	0.66857	0.610063	0.617057	0.467784	0.661326
TCGA-78-7166-01A-12R-2066-07	0.544422	0.680961	0.780753	0.591765	0.726024	0.818695	0.307666	0.692756	0.515402	0.732907	0.780354	0.498015	0.36087	0.806352	0.527493	0.681338	0.412627	0.693229	0.609742	0.551257	0.608828	0.487135	0.644779
TCGA-55-7995-01A-11R-2187-07	0.628832	0.764703	0.869162	0.644983	0.768996	0.793455	0.363263	0.724198	0.707173	0.852576	0.946641	0.591502	0.525226	0.833186	0.534098	0.767656	0.287678	0.778875	0.802176	0.688111	0.674745	0.456839	0.637336
TCGA-49-4494-01A-01R-1206-07	0.513933	0.744696	0.815981	0.696778	0.731634	0.790776	0.372926	0.744959	0.513726	0.794139	0.854012	0.585222	0.564544	0.827909	0.535178	0.729296	0.374592	0.720412	0.747961	0.62711	0.639721	0.510506	0.696405
TCGA-49-4501-01A-01R-1206-07	0.657544	0.675454	0.81511	0.675699	0.763229	0.786459	0.4654	0.747718	0.651313	0.79926	0.867884	0.630175	0.688598	0.856984	0.556995	0.750001	0.380524	0.804097	0.762511	0.719476	0.69205	0.536897	0.660091
TCGA-91-6847-01A-11R-1949-07	0.215392	0.603935	0.685394	0.474959	0.747244	0.689318	0.246264	0.668379	0.286411	0.757898	0.660887	0.389735	0.364587	0.763006	0.416794	0.697179	0.171813	0.695626	0.510756	0.525303	0.520522	0.433221	0.666231
TCGA-75-5126-01A-01R-1755-07	0.538322	0.787029	0.826567	0.741356	0.792957	0.735771	0.498796	0.808838	0.627459	0.862015	0.950292	0.722978	0.742376	0.860651	0.62728	0.77975	0.627341	0.82884	0.880201	0.718373	0.711037	0.521419	0.704596
TCGA-86-A4JF-01A-11R-A24X-07	0.541457	0.749246	0.799847	0.635283	0.781331	0.792829	0.479656	0.725752	0.616562	0.808374	0.874242	0.608131	0.635259	0.846847	0.508409	0.722709	0.501673	0.770964	0.754114	0.678067	0.634988	0.529844	0.70391
TCGA-49-AAR2-01A-11R-A39D-07	0.569669	0.691578	0.771472	0.592452	0.697303	0.806881	0.331203	0.619309	0.570686	0.782656	0.837593	0.484735	0.410405	0.833405	0.456333	0.6746	0.38237	0.730016	0.567613	0.568056	0.590476	0.489648	0.593224
TCGA-75-6211-01A-11R-1755-07	0.552081	0.722267	0.749951	0.599769	0.693551	0.831657	0.381037	0.667302	0.539702	0.792774	0.786197	0.498552	0.501737	0.823717	0.542078	0.729241	0.39708	0.754291	0.69394	0.62588	0.592669	0.491527	0.662802
TCGA-78-7159-01A-11R-2039-07	0.543671	0.707484	0.754864	0.643585	0.72274	0.830006	0.341019	0.713204	0.57084	0.807628	0.828135	0.53267	0.492285	0.799937	0.593477	0.715589	0.482607	0.778058	0.69009	0.555208	0.594463	0.529893	0.707423
TCGA-55-6971-01A-11R-1949-07	0.729962	0.78448	0.855217	0.68047	0.757675	0.821964	0.488862	0.735653	0.734086	0.816	0.944889	0.658659	0.725043	0.839939	0.574056	0.770841	0.494377	0.78173	0.848727	0.713619	0.69703	0.548702	0.715234
TCGA-50-5933-01A-11R-1755-07	0.429747	0.74424	0.761616	0.672088	0.771175	0.806593	0.446682	0.776331	0.627079	0.807412	0.927134	0.638298	0.664025	0.824987	0.602641	0.762402	0.391492	0.763416	0.888992	0.69735	0.684495	0.495749	0.657427
TCGA-95-A4VK-01A-11R-A262-07	0.652416	0.6817	0.806706	0.601663	0.725243	0.777528	0.399758	0.661464	0.614258	0.740049	0.842157	0.515149	0.462609	0.813103	0.451199	0.7229	0.432069	0.717602	0.66254	0.613574	0.637465	0.481851	0.637956
TCGA-64-5779-01A-01R-1628-07	0.657867	0.77985	0.800849	0.605335	0.694384	0.842115	0.407105	0.647979	0.646585	0.790437	0.804112	0.522892	0.498822	0.777493	0.465301	0.732067	0.194086	0.740992	0.646256	0.589533	0.598357	0.43745	0.641168
TCGA-05-4410-01A-21R-1858-07	0.679818	0.715604	0.816057	0.664061	0.752443	0.812084	0.455861	0.735813	0.698188	0.803065	0.917242	0.571178	0.531359	0.835156	0.539832	0.761392	0.468284	0.760213	0.736814	0.681476	0.662306	0.533478	0.656692
TCGA-44-A47G-01A-21R-A24H-07	0.712374	0.777504	0.86106	0.729945	0.766835	0.779201	0.477334	0.729333	0.706054	0.829991	0.950477	0.645522	0.675431	0.842971	0.588536	0.761807	0.418347	0.797074	0.834679	0.689561	0.711206	0.509262	0.676353
TCGA-97-8179-01A-11R-2287-07	0.368703	0.610846	0.686244	0.670612	0.695549	0.723057	0.424013	0.698342	0.428128	0.796889	0.79945	0.527745	0.582973	0.824937	0.492063	0.73926	0.330946	0.701257	0.692994	0.62207	0.595678	0.475845	0.658628
TCGA-78-7155-01A-11R-2039-07	0.344364	0.708312	0.698193	0.550059	0.741049	0.741181	0.320235	0.680296	0.383682	0.770683	0.726539	0.509576	0.523543	0.762876	0.48036	0.667478	0.140194	0.70312	0.666681	0.547192	0.557057	0.305841	0.65374
TCGA-75-6206-01A-11R-1755-07	0.458339	0.573055	0.701816	0.674455	0.73439	0.751509	0.510077	0.737248	0.555952	0.796184	0.858815	0.597896	0.650663	0.806063	0.556172	0.728751	0.42207	0.732964	0.740597	0.667449	0.644392	0.475715	0.647642
TCGA-05-4418-01A-01R-1206-07	0.635115	0.748906	0.819357	0.659903	0.747769	0.798479	0.383316	0.77758	0.660376	0.772189	0.905026	0.633597	0.572232	0.825437	0.571442	0.712894	0.509032	0.792161	0.762544	0.676103	0.684376	0.542737	0.701578
TCGA-44-2661-01A-01R-1107-07	0.718275	0.730826	0.885111	0.739011	0.784922	0.750892	0.514491	0.778218	0.739546	0.855796	0.949648	0.706737	0.771222	0.857218	0.56672	0.782229	0.486262	0.779448	0.86076	0.746989	0.704667	0.549656	0.661794
TCGA-80-5608-01A-31R-1949-07	0.4704	0.701707	0.78148	0.66566	0.722331	0.832707	0.39873	0.707883	0.507251	0.805713	0.825588	0.531649	0.562849	0.811985	0.620325	0.716988	0.527924	0.769837	0.694591	0.652536	0.617059	0.549559	0.720324
TCGA-55-6984-01A-11R-1949-07	0.616148	0.700352	0.738801	0.64367	0.72906	0.805961	0.442441	0.689736	0.606179	0.774785	0.815813	0.549463	0.494718	0.80734	0.492973	0.730602	0.502367	0.747784	0.670847	0.631931	0.628918	0.590963	0.701453
TCGA-75-7031-01A-11R-1949-07	0.485212	0.72962	0.822724	0.666496	0.749291	0.825366	0.423624	0.707836	0.50875	0.821596	0.854498	0.534976	0.563121	0.795172	0.508516	0.717464	0.302756	0.730574	0.741525	0.639225	0.630008	0.497497	0.66841
TCGA-99-8032-01A-11R-2241-07	0.598245	0.696231	0.73778	0.625033	0.745003	0.842948	0.423006	0.713972	0.596101	0.833539	0.847974	0.539727	0.579694	0.791972	0.520867	0.743555	0.37374	0.768119	0.732497	0.609221	0.635749	0.549236	0.689679
TCGA-55-8512-01A-11R-2403-07	0.387094	0.516793	0.689616	0.631585	0.74007	0.765411	0.50602	0.702891	0.479648	0.833324	0.79441	0.53128	0.614337	0.790253	0.518381	0.734717	0.589037	0.818247	0.673748	0.622885	0.596729	0.486192	0.572188
TCGA-97-A4M2-01A-12R-A24X-07	0.611763	0.65099	0.8364	0.692905	0.748485	0.771599	0.468954	0.732824	0.679287	0.8724	0.945001	0.649834	0.657743	0.839798	0.583562	0.76746	0.488701	0.775191	0.792664	0.704278	0.678597	0.502062	0.624132
TCGA-50-6673-01A-11R-1949-07	0.56259	0.676922	0.70257	0.660198	0.753713	0.764132	0.448729	0.787522	0.552979	0.798155	0.856825	0.57106	0.644774	0.845253	0.555206	0.740177	0.420185	0.782223	0.750067	0.677232	0.667997	0.534633	0.664408
TCGA-67-3772-01A-01R-0946-07	0.653689	0.675678	0.793782	0.689566	0.753054	0.7565	0.435787	0.776556	0.618135	0.82494	0.876273	0.630613	0.665299	0.853617	0.519779	0.74561	0.40021	0.776578	0.794325	0.669968	0.662543	0.546754	0.676573
TCGA-86-7954-01A-11R-2187-07	0.580891	0.737532	0.814085	0.660906	0.779853	0.79159	0.435835	0.738564	0.628239	0.833176	0.934859	0.625964	0.623109	0.838321	0.527526	0.763942	0.444078	0.764612	0.810162	0.705791	0.674985	0.504384	0.669184
TCGA-44-6775-01C-02R-A277-07	0.406027	0.659245	0.471205	0.568364	0.568765	0.465324	0.497453	0.568086	0.577405	0.715953	0.67861	0.352755	0.452135	0.607954	0.323313	0.632718	0.150259	0.616784	0.660656	0.501479	0.481029	0.31591	0.672053
TCGA-L9-A743-01A-43R-A39D-07	0.684726	0.794695	0.844389	0.707066	0.760042	0.809658	0.524658	0.737507	0.683229	0.83914	0.9419	0.644501	0.635947	0.842968	0.575491	0.773079	0.49942	0.785076	0.835914	0.692888	0.699161	0.553997	0.704715
TCGA-05-4433-01A-22R-1858-07	0.533133	0.695456	0.808276	0.703276	0.744477	0.805348	0.424651	0.765064	0.618345	0.824647	0.919616	0.61708	0.649444	0.836019	0.581246	0.749992	0.530152	0.780068	0.775964	0.700154	0.664584	0.553566	0.708539
TCGA-91-A4BC-01A-11R-A24H-07	0.631404	0.772702	0.900578	0.596819	0.746718	0.769938	0.39756	0.70467	0.636471	0.80214	0.924571	0.58866	0.551756	0.828677	0.560509	0.76431	0.368669	0.747547	0.736337	0.624343	0.678771	0.512309	0.653345
TCGA-91-6829-01A-21R-1858-07	0.414109	0.642566	0.69051	0.596779	0.774591	0.697926	0.362609	0.763804	0.49369	0.809885	0.832011	0.5951	0.660202	0.794728	0.548637	0.755161	0.254557	0.768609	0.782274	0.6611	0.657474	0.441702	0.669525
TCGA-44-6779-01A-11R-1858-07	0.53073	0.780286	0.876371	0.670208	0.793842	0.800503	0.412483	0.786716	0.625771	0.813796	0.931022	0.630028	0.655275	0.835467	0.631859	0.782448	0.539685	0.794412	0.85091	0.703378	0.687615	0.492986	0.710561
TCGA-05-4432-01A-01R-1206-07	0.600136	0.740417	0.779616	0.632845	0.722282	0.846278	0.403996	0.726861	0.64252	0.845776	0.869636	0.587118	0.627522	0.848581	0.540997	0.769058	0.465291	0.784782	0.775513	0.655084	0.651506	0.557699	0.68353
TCGA-05-4398-01A-01R-1206-07	0.593226	0.746794	0.777913	0.696867	0.749071	0.790932	0.408729	0.746051	0.634308	0.810415	0.931318	0.621862	0.595136	0.850783	0.583689	0.7418	0.446947	0.754359	0.838333	0.707554	0.682201	0.529942	0.61415
TCGA-L4-A4E5-01A-11R-A24X-07	0.446952	0.670592	0.706377	0.592016	0.707677	0.828597	0.356675	0.677112	0.508104	0.784995	0.78016	0.472146	0.419887	0.831214	0.440411	0.70889	0.325441	0.718934	0.672928	0.591616	0.581227	0.420996	0.654151
TCGA-53-7624-01A-11R-2066-07	0.40847	0.756652	0.724729	0.605095	0.741084	0.743071	0.285434	0.714972	0.4976	0.765455	0.781574	0.51477	0.367773	0.76152	0.553569	0.705871	0.252814	0.730519	0.681034	0.599536	0.59199	0.391643	0.674112
TCGA-55-6968-01A-11R-1949-07	0.581403	0.784108	0.802578	0.644452	0.726425	0.764297	0.360852	0.748659	0.662185	0.817277	0.885628	0.561603	0.457996	0.815864	0.61831	0.784768	0.329951	0.781685	0.811469	0.669034	0.638841	0.537503	0.667246
TCGA-93-A4JP-01A-11R-A24X-07	0.393068	0.650413	0.710072	0.648462	0.771789	0.723773	0.485014	0.765337	0.556501	0.847463	0.881598	0.5882	0.660397	0.839959	0.537844	0.759128	0.435725	0.81246	0.751487	0.683008	0.635263	0.485268	0.669075
TCGA-44-2655-01A-01R-0946-07	0.651782	0.676052	0.772992	0.681246	0.725675	0.764546	0.424237	0.747797	0.628225	0.817413	0.831368	0.593724	0.640834	0.839879	0.514948	0.735451	0.43514	0.723691	0.720844	0.669664	0.639488	0.521392	0.652563
TCGA-55-1594-01A-01R-0946-07	0.561915	0.700991	0.783019	0.622996	0.731781	0.731341	0.362239	0.711638	0.564039	0.819763	0.826555	0.569037	0.524648	0.820767	0.509474	0.738201	0.363218	0.749826	0.740762	0.642919	0.600235	0.568495	0.622996
TCGA-50-5941-01A-11R-1755-07	0.713779	0.790989	0.866032	0.694789	0.792271	0.764417	0.48551	0.76643	0.723387	0.826341	0.935201	0.649947	0.723603	0.85257	0.636586	0.801828	0.538685	0.773143	0.856033	0.745871	0.694979	0.590713	0.703769
TCGA-49-6767-01A-11R-1858-07	0.360739	0.740905	0.829337	0.602409	0.730839	0.760401	0.325946	0.73774	0.555954	0.778118	0.900901	0.517707	0.379019	0.838037	0.558104	0.730358	0.286159	0.73124	0.757741	0.641917	0.628019	0.475588	0.614598
TCGA-75-5122-01A-01R-1755-07	0.615673	0.83898	0.922472	0.750383	0.798255	0.777289	0.536441	0.809207	0.722301	0.842142	1	0.736826	0.730478	0.873349	0.644346	0.787481	0.511839	0.787973	0.912855	0.722912	0.736746	0.514589	0.712315
TCGA-78-7539-01A-11R-2066-07	0.558203	0.6788	0.860352	0.679128	0.767699	0.812387	0.459287	0.717852	0.621763	0.78856	0.890383	0.582971	0.621456	0.841894	0.527105	0.72965	0.344809	0.741684	0.767697	0.675913	0.643761	0.581325	0.652555
TCGA-55-7726-01A-11R-2170-07	0.479649	0.731739	0.681089	0.692314	0.753469	0.783122	0.457822	0.736254	0.567328	0.783597	0.847803	0.589833	0.593162	0.762712	0.556188	0.750205	0.429606	0.765519	0.798202	0.665151	0.653226	0.49001	0.68573
TCGA-78-7162-01A-21R-2066-07	0.643159	0.701821	0.835847	0.65202	0.752814	0.736995	0.517115	0.76572	0.636567	0.837139	0.849348	0.612217	0.725732	0.830366	0.603371	0.750705	0.361323	0.755328	0.753194	0.695914	0.6755	0.528642	0.696958
TCGA-55-6979-01A-11R-1949-07	0.665074	0.794709	0.855325	0.687703	0.773654	0.75795	0.449191	0.764617	0.686879	0.826715	0.961239	0.643652	0.672633	0.830729	0.600721	0.788544	0.382294	0.792837	0.860687	0.719832	0.716335	0.53651	0.726194
TCGA-86-8669-01A-11R-2403-07	0.572712	0.698876	0.778925	0.631845	0.740446	0.78059	0.437843	0.701392	0.605413	0.851704	0.847738	0.57388	0.576012	0.837295	0.521081	0.740121	0.384962	0.764868	0.743154	0.669727	0.640374	0.60608	0.661298
TCGA-44-3918-01A-01R-1107-07	0.643213	0.74648	0.886755	0.672503	0.795804	0.853766	0.471241	0.780539	0.717459	0.818932	0.943314	0.643044	0.644311	0.815987	0.600541	0.78408	0.479844	0.742059	0.82791	0.72771	0.70561	0.571113	0.663489
TCGA-75-6212-01A-11R-1755-07	0.733932	0.69472	0.765957	0.734806	0.772931	0.766289	0.522186	0.757942	0.707799	0.809228	0.911152	0.65501	0.682685	0.852209	0.532861	0.750346	0.410549	0.751625	0.793365	0.681545	0.666893	0.5154	0.634045
TCGA-44-5645-01B-04R-A277-07	0.327273	0.481418	0.459396	0.544748	0.521302	0.496817	0.417032	0.51326	0.517675	0.633668	0.674949	0.248077	0.418676	0.590129	0.264798	0.611763	0.113371	0.573883	0.623861	0.476126	0.440358	0.289094	0.548151
TCGA-44-3396-01A-01R-1206-07	0.641217	0.787829	0.833562	0.699091	0.743142	0.772564	0.484179	0.768363	0.664333	0.815373	0.918878	0.636855	0.648092	0.826826	0.566394	0.764463	0.568062	0.807811	0.845696	0.686082	0.673119	0.563406	0.670817
TCGA-50-8457-01A-11R-2326-07	0.729966	0.636068	0.822456	0.660383	0.758063	0.753037	0.507461	0.714323	0.72196	0.817019	0.900984	0.618436	0.680737	0.845303	0.567932	0.770182	0.38181	0.756074	0.797543	0.679321	0.673278	0.504154	0.627144
TCGA-49-AARE-01A-11R-A41B-07	0.571736	0.707299	0.771444	0.569514	0.746333	0.800253	0.361083	0.700524	0.558009	0.745367	0.84189	0.48842	0.44643	0.802059	0.528345	0.688202	0.378841	0.752034	0.682914	0.536623	0.616151	0.463646	0.564149
TCGA-49-4487-01A-21R-1858-07	0.759667	0.853427	0.883415	0.666612	0.772409	0.760865	0.444138	0.72746	0.760913	0.789782	0.914735	0.621153	0.631568	0.843277	0.562136	0.765735	0.344318	0.761244	0.777404	0.678346	0.688073	0.480601	0.724785
TCGA-44-6774-01A-21R-1858-07	0.532946	0.702672	0.720634	0.664378	0.77742	0.812037	0.495855	0.765484	0.579992	0.850987	0.896654	0.648173	0.672898	0.832648	0.597572	0.787286	0.434373	0.791104	0.840097	0.707934	0.698139	0.512616	0.665296
TCGA-L9-A5IP-01A-21R-A39D-07	0.357433	0.737774	0.748187	0.637944	0.736202	0.78007	0.387111	0.706292	0.506906	0.763003	0.8111	0.514646	0.488183	0.780069	0.545535	0.713729	0.559906	0.745817	0.695512	0.615577	0.635057	0.51005	0.65728
TCGA-69-8253-01A-11R-2287-07	0.624056	0.643462	0.753382	0.662604	0.728886	0.777104	0.434927	0.730205	0.591424	0.801954	0.811145	0.571739	0.648561	0.818808	0.529263	0.678748	0.4632	0.725775	0.705126	0.634318	0.632011	0.472635	0.625569
TCGA-L9-A7SV-01A-11R-A39D-07	0.400125	0.652313	0.697149	0.529544	0.665598	0.825169	0.431817	0.639752	0.461548	0.770102	0.724662	0.378035	0.368406	0.781878	0.448666	0.671294	0.163946	0.695561	0.586491	0.557095	0.532712	0.423735	0.571284
TCGA-97-8172-01A-11R-2287-07	0.749244	0.641895	0.828911	0.673818	0.730316	0.788242	0.408747	0.712151	0.735735	0.808363	0.909368	0.59982	0.670998	0.84184	0.529629	0.769068	0.310038	0.733824	0.787536	0.713063	0.674284	0.517624	0.613902
TCGA-86-A4P7-01A-11R-A24X-07	0.644149	0.689446	0.82462	0.647254	0.743227	0.74165	0.498265	0.730904	0.664499	0.809117	0.908199	0.615041	0.702149	0.83879	0.533798	0.763667	0.390327	0.780067	0.770108	0.687673	0.671838	0.54582	0.669227
TCGA-55-7574-01A-11R-2039-07	0.784807	0.778455	0.863616	0.661736	0.746329	0.781944	0.513753	0.730215	0.767806	0.790976	0.913581	0.618886	0.68076	0.830473	0.534497	0.767217	0.356156	0.752941	0.797072	0.679513	0.701566	0.512657	0.677029
TCGA-NJ-A4YI-01A-11R-A262-07	0.34888	0.559285	0.636272	0.661148	0.694688	0.785798	0.294037	0.692096	0.451284	0.790243	0.856037	0.573477	0.578816	0.813882	0.445308	0.718804	0.310635	0.731135	0.711697	0.598145	0.60197	0.492635	0.555669
TCGA-44-2668-01B-02R-A277-07	0.374463	0.788152	0.628737	0.613194	0.622039	0.622402	0.394378	0.622477	0.530358	0.757518	0.872232	0.470013	0.450498	0.711852	0.457638	0.663029	0.514527	0.736557	0.758047	0.575402	0.578236	0.468428	0.59145
TCGA-55-8620-01A-11R-2403-07	0.577721	0.695974	0.771419	0.630904	0.695785	0.787942	0.341676	0.679024	0.577849	0.709751	0.796475	0.478084	0.469784	0.789075	0.478855	0.749695	0.297072	0.703904	0.714324	0.602718	0.574558	0.541591	0.587128
TCGA-55-7728-01A-11R-2187-07	0.66469	0.683405	0.802206	0.691585	0.737997	0.813738	0.47137	0.742646	0.711124	0.804611	0.979473	0.657561	0.619402	0.867795	0.543834	0.755155	0.472931	0.777037	0.812137	0.699042	0.66022	0.621376	0.647577
TCGA-69-7973-01A-11R-2187-07	0.536943	0.729333	0.706376	0.612932	0.721219	0.81096	0.402794	0.699425	0.530315	0.817582	0.804631	0.574733	0.630308	0.814022	0.561081	0.7169	0.390727	0.769768	0.669068	0.637693	0.63987	0.544868	0.726018
TCGA-50-5932-01A-11R-1755-07	0.461243	0.594703	0.681083	0.610001	0.717745	0.785169	0.422842	0.730916	0.557709	0.773168	0.785302	0.527254	0.568057	0.798201	0.52613	0.723517	0.360226	0.710165	0.674198	0.617953	0.594185	0.462988	0.630001
TCGA-05-4430-01A-02R-1206-07	0.569623	0.703615	0.791402	0.700249	0.769522	0.785765	0.458271	0.775702	0.599386	0.8618	0.899791	0.667478	0.716964	0.849497	0.582482	0.784749	0.499742	0.764379	0.839559	0.725208	0.68012	0.52301	0.668919
TCGA-49-4486-01A-01R-1206-07	0.444126	0.56726	0.718341	0.604296	0.681681	0.72227	0.452092	0.736468	0.435288	0.743327	0.724432	0.474342	0.530123	0.791458	0.453443	0.629243	0.360158	0.655344	0.569924	0.535699	0.56946	0.47442	0.619498
TCGA-78-8662-01A-11R-2403-07	0.353381	0.656175	0.681209	0.562612	0.705193	0.758247	0.444459	0.696712	0.419161	0.758427	0.705228	0.417448	0.46241	0.804321	0.474892	0.711256	0.26705	0.674223	0.580906	0.58269	0.58013	0.433585	0.647091
TCGA-95-8039-01A-11R-2241-07	0.569594	0.720478	0.813585	0.69212	0.756396	0.77524	0.442088	0.737308	0.582583	0.811838	0.887398	0.608601	0.645297	0.846587	0.506473	0.778195	0.356686	0.765061	0.789001	0.69329	0.673008	0.522361	0.676425
TCGA-MP-A4TA-01A-21R-A24X-07	0.497063	0.738273	0.774395	0.627004	0.72787	0.754479	0.321174	0.728113	0.525602	0.766009	0.866103	0.558577	0.493059	0.804955	0.547009	0.704574	0.395933	0.767345	0.714621	0.565129	0.646636	0.447266	0.651385
TCGA-55-7284-01B-11R-2241-07	0.482392	0.655561	0.763795	0.665561	0.744929	0.784433	0.450337	0.740032	0.547516	0.816862	0.87668	0.595763	0.686712	0.826168	0.563861	0.78037	0.476589	0.791957	0.743504	0.7039	0.662997	0.556747	0.688676
TCGA-69-7764-01A-11R-2170-07	0.541977	0.700466	0.795669	0.590256	0.697299	0.725193	0.444884	0.668634	0.602251	0.733204	0.764848	0.468159	0.488605	0.763166	0.476184	0.713329	0.238456	0.692689	0.631017	0.595002	0.613197	0.46087	0.712194
TCGA-44-A4SU-01A-11R-A24X-07	0.65066	0.618391	0.752026	0.598135	0.725455	0.778254	0.3601	0.668411	0.621277	0.783074	0.816464	0.460195	0.532935	0.794844	0.469064	0.721066	0.243315	0.721659	0.703476	0.624541	0.629395	0.434601	0.608027
TCGA-49-4506-01A-01R-1206-07	0.604351	0.807266	0.866697	0.679535	0.74353	0.790957	0.404739	0.729743	0.626045	0.764308	0.86444	0.584853	0.508618	0.829463	0.517255	0.713165	0.48604	0.702627	0.734587	0.650051	0.65772	0.473523	0.689692
TCGA-78-7161-01A-11R-2039-07	0.307634	0.553975	0.675164	0.544484	0.699617	0.839933	0.400129	0.639111	0.331758	0.752907	0.749579	0.41856	0.418112	0.784762	0.424416	0.675606	0.385662	0.722145	0.562005	0.551247	0.531213	0.528212	0.664127
TCGA-49-AAQV-01A-11R-A39D-07	0.639021	0.717912	0.79776	0.655087	0.794156	0.791551	0.400104	0.694897	0.599419	0.835844	0.877534	0.52086	0.524395	0.839624	0.516993	0.716805	0.456052	0.753739	0.704037	0.63224	0.638865	0.548398	0.657015
TCGA-62-A46P-01A-11R-A24H-07	0.461134	0.58886	0.73843	0.601947	0.750033	0.82297	0.430181	0.702971	0.446804	0.767753	0.794663	0.527013	0.551369	0.80975	0.46398	0.718914	0.41106	0.7298	0.633813	0.58715	0.580887	0.53045	0.658859
TCGA-49-6761-01A-31R-1949-07	0.60384	0.737232	0.820353	0.657492	0.781374	0.843105	0.434153	0.744099	0.632918	0.770528	0.874418	0.547193	0.558055	0.823146	0.614121	0.752342	0.381338	0.742034	0.760144	0.651968	0.667779	0.472196	0.646127
TCGA-44-3919-01A-02R-1107-07	0.649012	0.724967	0.825549	0.692985	0.751459	0.750506	0.396036	0.732557	0.667835	0.825205	0.911066	0.611354	0.635403	0.825811	0.536527	0.773446	0.405291	0.753772	0.816697	0.72006	0.673961	0.528305	0.698298
TCGA-69-7980-01A-11R-2187-07	0.516293	0.69975	0.789107	0.643607	0.745867	0.766495	0.465949	0.715471	0.571117	0.795591	0.869635	0.584237	0.641419	0.811006	0.539332	0.744183	0.319924	0.74346	0.740454	0.675416	0.646206	0.498946	0.636243
TCGA-93-7348-01A-21R-2039-07	0.62077	0.663669	0.744545	0.648074	0.76381	0.762931	0.515377	0.674336	0.625247	0.818045	0.836429	0.546294	0.557763	0.821167	0.484469	0.737081	0.383525	0.757416	0.73	0.63421	0.656664	0.571992	0.657263
TCGA-75-7030-01A-11R-1949-07	0.67785	0.671257	0.777402	0.676829	0.752658	0.797593	0.498868	0.708208	0.63445	0.83187	0.839337	0.598375	0.605542	0.826101	0.583677	0.776457	0.461279	0.768083	0.769142	0.676473	0.686563	0.603279	0.666017
TCGA-86-8074-01A-11R-2241-07	0.480926	0.683851	0.71156	0.655639	0.754202	0.76776	0.355315	0.729226	0.558929	0.808983	0.878829	0.59057	0.562063	0.818655	0.533457	0.753808	0.355424	0.757259	0.808437	0.671602	0.655627	0.457235	0.667906
TCGA-78-7158-01A-11R-2039-07	0.349138	0.576006	0.661465	0.597854	0.729484	0.72166	0.328716	0.690472	0.452411	0.771007	0.789129	0.477906	0.525207	0.768611	0.434122	0.716701	0.241384	0.751211	0.644279	0.592548	0.57284	0.523083	0.610295
TCGA-05-5425-01A-02R-1628-07	0.613116	0.814535	0.857576	0.667809	0.775223	0.77599	0.488369	0.776014	0.669688	0.814804	0.924781	0.684279	0.636011	0.839931	0.608765	0.772657	0.558917	0.785908	0.806278	0.704531	0.694486	0.496523	0.714462
TCGA-91-6831-01A-11R-1858-07	0.485192	0.751156	0.739945	0.630101	0.747078	0.838838	0.387952	0.726958	0.570987	0.787816	0.877239	0.57393	0.556475	0.794403	0.571481	0.758968	0.434097	0.763398	0.803541	0.592794	0.620019	0.462389	0.688089
TCGA-97-8175-01A-11R-2287-07	0.495548	0.691226	0.735928	0.70014	0.749542	0.777069	0.364265	0.752327	0.566199	0.806118	0.885077	0.606505	0.613934	0.830373	0.536751	0.747424	0.473349	0.755092	0.799887	0.646084	0.615416	0.517223	0.673311
TCGA-86-8672-01A-21R-2403-07	0.551799	0.744226	0.834055	0.653012	0.751597	0.812284	0.370877	0.726266	0.612477	0.77123	0.918917	0.559927	0.556692	0.809535	0.563975	0.756357	0.40104	0.702757	0.80625	0.670293	0.668954	0.491799	0.676034
TCGA-44-5645-01A-01R-A278-07	0.598122	0.643487	0.716233	0.628885	0.655914	0.67107	0.40698	0.686092	0.636508	0.75501	0.85214	0.473177	0.566959	0.790417	0.393024	0.753587	0.346379	0.678409	0.766421	0.637977	0.622635	0.488358	0.650331
TCGA-50-6594-01A-11R-1755-07	0.375765	0.68769	0.713836	0.610523	0.769524	0.718876	0.316077	0.715875	0.518296	0.812764	0.797314	0.492547	0.422299	0.811268	0.542904	0.716003	0.307736	0.715186	0.69587	0.649984	0.635242	0.423694	0.577281
TCGA-86-7714-01A-12R-2170-07	0.408457	0.613442	0.680164	0.685356	0.740127	0.754662	0.401192	0.678523	0.510813	0.812667	0.834067	0.563599	0.629431	0.816694	0.45744	0.761553	0.457765	0.715087	0.742221	0.608061	0.617783	0.475625	0.662473
TCGA-86-6562-01A-11R-1755-07	0.509014	0.70668	0.709371	0.62382	0.736698	0.767073	0.422296	0.756372	0.572174	0.810803	0.838683	0.614144	0.724099	0.824963	0.559311	0.747411	0.487998	0.746053	0.768982	0.618974	0.665541	0.516008	0.705408
TCGA-55-8090-01A-11R-2241-07	0.524111	0.691955	0.718554	0.652473	0.747741	0.820281	0.426753	0.732822	0.546872	0.821319	0.846906	0.588586	0.688498	0.831911	0.534227	0.750735	0.389738	0.762727	0.779813	0.656248	0.630966	0.559094	0.675564
TCGA-55-7911-01A-11R-2170-07	0.561767	0.818546	0.879401	0.649853	0.727085	0.728857	0.415891	0.708868	0.634296	0.788306	0.878841	0.511985	0.520475	0.809124	0.493154	0.746739	0.327701	0.726868	0.741987	0.658597	0.618355	0.537427	0.725013
TCGA-55-8507-01A-11R-2403-07	0.414509	0.67018	0.691481	0.612791	0.704167	0.772741	0.377964	0.723374	0.500946	0.819109	0.832117	0.580176	0.546767	0.810943	0.480621	0.750248	0.445226	0.807993	0.732098	0.599923	0.604082	0.490601	0.658282
TCGA-93-8067-01A-11R-2287-07	0.472618	0.725731	0.751449	0.627935	0.757537	0.792606	0.436079	0.716429	0.487417	0.787383	0.799371	0.545273	0.574781	0.775763	0.546245	0.718945	0.434789	0.741427	0.713034	0.651898	0.627246	0.480658	0.69545
TCGA-44-3918-01A-01R-A278-07	0.538443	0.784762	0.798898	0.605529	0.706239	0.723098	0.456795	0.72414	0.686889	0.747214	0.86171	0.498029	0.555904	0.696026	0.461869	0.756783	0.336834	0.678262	0.774458	0.599547	0.604831	0.490805	0.679714
TCGA-97-7553-01A-21R-2039-07	0.647905	0.77618	0.840311	0.732444	0.767384	0.727763	0.530442	0.78235	0.707218	0.872327	0.955865	0.678188	0.733377	0.869196	0.640848	0.803109	0.599714	0.804451	0.848362	0.742994	0.696667	0.551568	0.706849
TCGA-55-8205-01A-11R-2241-07	0.638497	0.811703	0.857406	0.694896	0.753502	0.746637	0.494999	0.768268	0.725208	0.821811	0.974524	0.666393	0.634997	0.852241	0.620906	0.795246	0.451253	0.791695	0.869175	0.727828	0.719036	0.534721	0.702557
TCGA-05-4390-01A-02R-1755-07	0.504875	0.714733	0.683939	0.652194	0.720811	0.838785	0.361599	0.748524	0.55478	0.786266	0.845804	0.549832	0.45649	0.822701	0.549919	0.721628	0.432555	0.759394	0.741128	0.674545	0.62286	0.493249	0.703538
TCGA-86-8668-01A-11R-2403-07	0.653331	0.625142	0.753335	0.655624	0.710214	0.747259	0.429739	0.721327	0.632597	0.787989	0.868537	0.577006	0.592731	0.828721	0.517773	0.782652	0.345312	0.757018	0.77506	0.704733	0.66444	0.533018	0.636957
TCGA-62-8398-01A-11R-2326-07	0.487506	0.749148	0.755278	0.660793	0.747525	0.793086	0.383014	0.738292	0.531369	0.782795	0.846852	0.603173	0.568162	0.840206	0.510496	0.709052	0.454288	0.745614	0.762912	0.673445	0.668366	0.571185	0.735976
TCGA-55-8513-01A-11R-2403-07	0.656772	0.62432	0.71448	0.711294	0.743719	0.780797	0.514783	0.731356	0.679376	0.859313	0.938448	0.646459	0.648781	0.84109	0.532919	0.782972	0.523911	0.81019	0.784349	0.708851	0.660539	0.516972	0.634177
TCGA-83-5908-01A-21R-2287-07	0.562711	0.860128	0.898487	0.657062	0.781195	0.78702	0.449663	0.730744	0.666346	0.805401	0.900744	0.548055	0.590213	0.83251	0.648179	0.776834	0.349735	0.772714	0.781847	0.676231	0.679136	0.520568	0.705246
TCGA-05-4422-01A-01R-1206-07	0.625024	0.740434	0.851461	0.642248	0.732493	0.767335	0.381675	0.663398	0.624298	0.783679	0.86246	0.529497	0.441953	0.815184	0.516141	0.693327	0.294359	0.713287	0.684661	0.639129	0.66229	0.482722	0.639028
TCGA-44-2662-01A-01R-0946-07	0.499408	0.747451	0.744418	0.692504	0.730484	0.770368	0.410514	0.781612	0.604802	0.868698	0.943598	0.636391	0.604003	0.847079	0.562784	0.729534	0.524744	0.793898	0.86668	0.678924	0.649247	0.567181	0.661355
TCGA-50-5045-01A-01R-1628-07	0.757699	0.77512	0.874761	0.725028	0.77999	0.795746	0.513041	0.799802	0.747339	0.839992	0.95599	0.676403	0.722903	0.866961	0.617974	0.786387	0.468597	0.789954	0.859284	0.765411	0.719908	0.569287	0.688249
TCGA-44-6146-01B-04R-A277-07	0.105296	0.436836	0.419484	0.424788	0.524132	0.566809	0.400994	0.476228	0.310652	0.664255	0.506738	0.221127	0.373551	0.610175	0.284602	0.600541	0.14268	0.577156	0.477428	0.447728	0.413115	0.379555	0.603039
TCGA-44-4112-01B-06R-A277-07	0.257449	0.634333	0.513185	0.508398	0.537614	0.57036	0.41206	0.564216	0.487899	0.664969	0.646101	0.331258	0.465974	0.625097	0.319157	0.633388	0.0917649	0.625319	0.598307	0.487128	0.465335	0.28449	0.60216
TCGA-91-6836-01A-21R-1858-07	0.487444	0.74841	0.722342	0.62859	0.747282	0.798985	0.356346	0.717645	0.51205	0.761449	0.78568	0.522745	0.577297	0.794268	0.541383	0.676721	0.389681	0.742755	0.711235	0.579713	0.601468	0.419768	0.693023
TCGA-55-6975-01A-11R-1949-07	0.576978	0.746566	0.735794	0.596623	0.743532	0.810899	0.460626	0.734872	0.576921	0.742262	0.814339	0.566596	0.549696	0.808703	0.568485	0.734022	0.441563	0.739563	0.705869	0.587439	0.641955	0.493387	0.69458
TCGA-55-A491-01A-11R-A24H-07	0.625134	0.673929	0.768897	0.641434	0.770056	0.782094	0.411604	0.70121	0.64112	0.851872	0.879631	0.584889	0.581211	0.834466	0.551296	0.739792	0.343764	0.76541	0.769499	0.637463	0.664246	0.530556	0.637863
TCGA-93-7347-01A-11R-2187-07	0.675552	0.719015	0.871809	0.696825	0.78253	0.789855	0.443467	0.738542	0.688178	0.860609	0.933769	0.655726	0.665611	0.852265	0.595456	0.767245	0.401357	0.740253	0.834242	0.730618	0.710424	0.564434	0.683705
TCGA-MP-A4T9-01A-11R-A24X-07	0.530763	0.712181	0.775736	0.643803	0.76516	0.770945	0.483736	0.76118	0.561269	0.838524	0.876062	0.604028	0.664222	0.855688	0.582147	0.752349	0.38964	0.778173	0.787099	0.690468	0.672	0.5074	0.643119
TCGA-49-AAR9-01A-21R-A41B-07	0.256345	0.704602	0.687385	0.536881	0.722427	0.821079	0.313338	0.646116	0.410396	0.72074	0.718584	0.429459	0.437542	0.785914	0.479876	0.738686	0.159536	0.741105	0.59749	0.534003	0.587508	0.53409	0.622203
TCGA-75-6203-01A-11R-1755-07	0.546101	0.656394	0.829142	0.721641	0.759918	0.71174	0.517756	0.798043	0.638318	0.833612	0.949226	0.666255	0.741556	0.885064	0.656816	0.808305	0.458962	0.787281	0.808111	0.716772	0.694126	0.501742	0.68873
TCGA-55-8091-01A-11R-2241-07	0.492105	0.668868	0.773203	0.668951	0.757172	0.789426	0.4903	0.749701	0.57566	0.838463	0.907497	0.643338	0.664271	0.823617	0.561809	0.761123	0.485422	0.77281	0.83899	0.69285	0.682753	0.576778	0.680188
TCGA-97-7547-01A-11R-2039-07	0.623636	0.563251	0.707794	0.603025	0.739387	0.757472	0.410816	0.691	0.618017	0.844772	0.821579	0.553079	0.651907	0.859242	0.503037	0.744049	0.308486	0.736096	0.747898	0.670455	0.671804	0.505576	0.624293
TCGA-05-4417-01A-22R-1858-07	0.65649	0.76474	0.8306	0.67543	0.745452	0.84428	0.501574	0.758098	0.669355	0.846904	0.907617	0.643069	0.667271	0.834434	0.572698	0.773039	0.512633	0.787564	0.819102	0.69953	0.686305	0.555879	0.717863
TCGA-62-A46R-01A-11R-A24H-07	0.535668	0.743422	0.774008	0.678875	0.740954	0.778206	0.441228	0.717711	0.624385	0.848308	0.889411	0.565356	0.620077	0.839292	0.486827	0.730793	0.381282	0.741169	0.732666	0.638276	0.616326	0.476487	0.660647
TCGA-49-4490-01A-21R-1858-07	0.45471	0.604494	0.735459	0.625007	0.761408	0.743338	0.367045	0.656181	0.482083	0.800343	0.848435	0.532994	0.536339	0.841875	0.504654	0.739261	0.358232	0.732292	0.665638	0.641182	0.648378	0.471322	0.607358
TCGA-05-4395-01A-01R-1206-07	0.41581	0.760403	0.791015	0.647311	0.740669	0.788194	0.347207	0.749383	0.520491	0.754443	0.851506	0.575265	0.51683	0.802749	0.566735	0.697868	0.50465	0.733838	0.741291	0.644892	0.633975	0.522537	0.690131
TCGA-62-A46Y-01A-11R-A24H-07	0.546529	0.696503	0.809566	0.730488	0.748223	0.742353	0.452623	0.760806	0.593869	0.874307	0.908612	0.592833	0.625758	0.839385	0.5206	0.754191	0.422072	0.783662	0.78758	0.638841	0.64438	0.515435	0.662143
TCGA-97-A4M7-01A-11R-A24X-07	0.628456	0.694862	0.788992	0.680648	0.77008	0.784464	0.50002	0.714292	0.630073	0.860802	0.901025	0.602961	0.685451	0.839274	0.521094	0.772647	0.450836	0.750926	0.804475	0.690837	0.656775	0.533968	0.673149

[truncated: 6 more sheets: Table S11, Table S12, Table S13, Table S14, Table S15, Table S16]
